# Supplementary material for: Mortality risk of COVID-19 in elderly males with comorbidities: a multi-country study
Source: Aging (Albany NY). 2020 Dec 31;13(1):27–60. doi: 10.18632/aging.202456 (PMC7835001; doi:10.18632/aging.202456)
Supplement: Supplementary Dataset 1 [file aging-13-202456-s004.xlsx]

## Sheet: OriginalData-提交 20201104 
Supplementary Dataset 1. This dataset shares our retrieved online records of 981 COVID-19 patients.
Number	Outcomes (0: Survival 1: Death)	Gender (0: Female 1:Male)	Age (years)	Region	Symptoms onset date	Admission date	Outcomes (Survival or Death) date	Onset of symptoms to hospital admission	Hospital admission to outcomes (Survival or Death)	Onset of symptoms to outcomes (Survival or Death)	Taking Dexamethasone	Taking Remdesivir	Collection time of cases	Any comorbidity	Hypertension	Diabetes mellitus	Cardiovascular diseases	Cerebrovascular diseases	Chronic liver diseases	Digestive system diseases	Cancers	Chronic bronchitis	COPD	Tuberculosis	Any symptom	Fever	Cough	Shortness of breath	Fatigue	Myalgia	Chills	Diarrhea	Headache	Nausea	Appetite loss	Abnormal bilateral lungs	Ground-glass opacity	Patch shadowing	Oval shadowing	Pleural thickening or adhesions	Bronchiectasis	Pleural effusion	Any complication	Respiratory failure	Multiple organ failure	Shock	ARDS	Hypoxia	Coma
1	1	1	61	China	12/20/2019	12/27/2019	1/9/2020	8	14	21	0	0	before 2020/1/23	1	0	0	0	0	1	0	0	0	0	0	1	1	1	0	1	0	0	0	0	0	0	NA	NA	NA	NA	NA	NA	NA	1	0	0	1	0	0	1
2	1	1	69	China	12/30/2019	1/3/2020	1/15/2020	5	13	17	0	0	before 2020/1/23	1	0	0	1	0	0	0	0	0	0	0	1	1	1	0	0	0	0	0	0	0	0	1	1	0	0	0	0	0	1	1	0	1	1	0	1
3	1	1	89	China	1/8/2020	1/8/2020	1/18/2020	1	11	11	0	0	before 2020/1/23	1	1	0	0	1	0	0	0	0	0	0	1	1	0	0	0	0	0	0	0	0	0	1	1	1	0	1	0	1	1	1	0	0	0	1	0
4	1	1	89	China	1/13/2020	1/18/2020	1/19/2020	6	2	7	0	0	before 2020/1/23	1	1	1	1	0	0	0	0	0	0	0	1	0	0	1	0	0	0	0	0	0	0	NA	NA	NA	NA	NA	NA	NA	NA	NA	NA	NA	NA	NA	NA
5	1	1	66	China	1/10/2020	1/16/2020	1/20/2020	7	5	11	0	0	before 2020/1/23	1	1	1	0	0	0	0	0	0	1	0	1	1	1	0	1	0	0	0	1	0	0	1	1	0	1	0	0	0	1	1	0	0	0	0	0
6	1	1	75	China	1/6/2020	1/11/2020	1/20/2020	6	10	15	0	0	before 2020/1/23	1	1	0	0	0	0	0	0	0	0	0	1	1	1	0	1	0	0	0	1	1	1	NA	NA	NA	NA	NA	NA	NA	NA	NA	NA	NA	NA	NA	NA
7	1	0	48	China	12/10/2019	12/10/2019	1/20/2020	1	42	42	0	0	before 2020/1/23	1	0	1	0	1	0	0	0	0	0	0	1	1	1	1	1	1	0	0	0	0	0	1	0	0	0	0	1	0	1	0	0	0	0	1	0
8	1	1	82	China	1/9/2020	1/14/2020	1/21/2020	6	8	13	0	0	before 2020/1/23	0	0	0	0	0	0	0	0	0	0	0	1	0	0	0	1	1	1	0	0	0	0	NA	NA	NA	NA	NA	NA	NA	1	1	0	0	0	0	0
9	1	1	66	China	12/22/2019	12/31/2019	1/21/2020	10	22	31	0	0	before 2020/1/23	0	0	0	0	0	0	0	0	0	0	0	1	0	1	1	0	0	0	0	0	0	0	NA	NA	NA	NA	NA	NA	NA	1	0	0	1	1	1	0
10	1	1	81	China	1/15/2020	1/18/2020	1/22/2020	4	5	8	0	0	before 2020/1/23	0	0	0	0	0	0	0	0	0	0	0	1	1	0	0	0	0	0	0	0	0	0	NA	NA	NA	NA	NA	NA	NA	NA	NA	NA	NA	NA	NA	NA
11	1	0	82	China	1/3/2020	1/6/2020	1/22/2020	4	17	20	0	0	before 2020/1/23	1	0	0	0	0	0	0	0	0	0	0	1	1	1	1	1	0	0	0	0	0	0	NA	NA	NA	NA	NA	NA	NA	1	1	0	0	0	0	0
12	1	1	65	China	1/8/2020	1/11/2020	1/21/2020	4	11	14	0	0	before 2020/1/23	0	0	0	0	0	0	0	0	0	0	0	1	0	0	1	1	0	0	0	0	0	0	NA	NA	NA	NA	NA	NA	NA	1	1	0	0	0	0	0
13	1	0	80	China	1/9/2020	1/18/2020	1/22/2020	10	5	14	0	0	before 2020/1/23	1	1	1	0	0	0	0	0	0	0	0	1	1	1	1	0	0	0	0	0	0	0	NA	NA	NA	NA	NA	NA	NA	1	0	0	0	0	1	0
14	1	1	53	China	1/1/2020	1/1/2020	1/21/2020	1	21	21	0	0	before 2020/1/23	0	0	0	0	0	0	0	0	0	0	0	1	1	1	1	0	0	0	0	0	0	0	NA	NA	NA	NA	NA	NA	NA	1	1	0	1	0	0	0
15	1	1	86	China	1/2/2020	1/9/2020	1/21/2020	8	13	20	0	0	before 2020/1/23	1	1	1	0	0	0	0	1	0	0	0	1	0	0	0	1	0	0	0	0	0	0	1	1	0	0	0	0	0	1	0	0	0	0	1	1
16	1	0	70	China	1/13/2020	1/13/2020	1/21/2020	1	9	9	0	0	before 2020/1/23	0	0	0	0	0	0	0	0	0	0	0	1	1	0	0	0	0	0	0	0	0	0	NA	NA	NA	NA	NA	NA	NA	1	1	0	0	0	0	0
17	1	1	84	China	1/6/2020	1/9/2020	1/22/2020	4	14	17	0	0	before 2020/1/23	1	1	0	1	1	0	1	0	1	0	0	1	1	1	1	0	0	0	0	0	0	0	NA	NA	NA	NA	NA	NA	NA	NA	NA	NA	NA	NA	NA	NA
18	1	0	69	China	1/14/2020	1/14/2020	1/22/2020	1	9	9	0	0	before 2020/1/24	0	0	0	0	0	0	0	0	0	0	0	1	1	1	0	0	1	0	0	0	0	0	NA	NA	NA	NA	NA	NA	NA	1	1	0	0	0	0	0
19	1	1	36	China	1/6/2020	1/9/2020	1/23/2020	4	15	18	0	0	before 2020/1/24	0	0	0	0	0	0	0	0	0	0	0	1	1	0	0	1	0	0	0	0	0	0	NA	NA	NA	NA	NA	NA	NA	NA	NA	NA	NA	NA	NA	NA
20	1	1	73	China	12/29/2019	1/5/2020	1/22/2020	8	18	25	0	0	before 2020/1/24	0	0	0	0	0	0	0	0	0	0	0	1	1	1	0	0	0	0	0	0	0	0	NA	NA	NA	NA	NA	NA	NA	1	1	0	0	0	0	0
21	1	0	70	China	1/15/2020	1/18/2020	1/23/2020	4	6	9	0	0	before 2020/1/24	0	0	0	0	0	0	0	0	0	0	0	1	1	0	0	0	0	0	0	0	0	0	NA	NA	NA	NA	NA	NA	NA	NA	NA	NA	NA	NA	NA	NA
22	1	1	81	China	1/9/2020	1/13/2020	1/21/2020	5	9	13	0	0	before 2020/1/24	1	1	1	1	0	0	0	0	0	0	1	1	1	0	0	0	0	0	0	0	0	0	NA	NA	NA	NA	NA	NA	NA	1	0	1	1	0	1	0
23	1	1	80	China	1/9/2020	1/13/2020	1/22/2020	5	10	14	0	0	before 2020/1/23	1	1	0	0	1	0	0	0	1	0	0	1	0	0	1	0	0	0	0	0	0	0	NA	NA	NA	NA	NA	NA	NA	NA	NA	NA	NA	NA	NA	NA
24	1	1	70	China	1/15/2020	1/19/2020	1/23/2020	5	5	9	0	0	before 2020/1/25	0	0	0	0	0	0	0	0	0	0	0	1	1	1	1	0	0	0	0	0	0	0	NA	NA	NA	NA	NA	NA	NA	1	0	0	0	0	1	0
25	1	0	76	China	1/18/2020	1/18/2020	1/24/2020	1	7	7	0	0	before 2020/1/25	1	1	1	0	0	0	0	0	0	0	0	1	1	0	0	0	0	0	0	0	0	0	NA	NA	NA	NA	NA	NA	NA	1	1	0	0	0	0	1
26	1	1	72	China	1/11/2020	1/18/2020	1/23/2020	8	6	13	0	0	before 2020/1/25	1	0	0	0	0	0	0	0	1	0	0	1	1	1	1	0	0	0	0	0	0	0	NA	NA	NA	NA	NA	NA	NA	1	0	0	0	0	0	1
27	1	1	79	China	1/11/2020	1/17/2020	1/24/2020	7	8	14	0	0	before 2020/1/25	1	1	1	0	0	0	0	0	0	0	0	1	1	1	1	0	0	0	0	0	0	0	NA	NA	NA	NA	NA	NA	NA	1	1	1	0	0	0	0
28	1	1	55	China	1/8/2020	1/19/2020	1/24/2020	12	6	17	0	0	before 2020/1/25	0	0	0	0	0	0	0	0	0	0	0	1	1	1	1	0	0	0	0	0	0	0	NA	NA	NA	NA	NA	NA	NA	1	1	1	0	0	0	1
29	1	1	87	China	1/12/2020	1/19/2020	1/23/2020	8	5	12	0	0	before 2020/1/25	1	0	1	0	0	0	0	0	0	0	0	1	1	0	1	0	0	0	1	0	0	0	NA	NA	NA	NA	NA	NA	NA	1	0	0	0	0	0	0
30	1	0	66	China	1/9/2020	1/19/2020	1/21/2020	11	3	13	0	0	before 2020/1/25	1	1	0	0	0	0	0	0	0	0	0	1	1	0	1	0	0	0	0	0	0	0	NA	NA	NA	NA	NA	NA	NA	NA	NA	NA	NA	NA	NA	NA
31	1	1	58	China	1/3/2020	1/18/2020	1/24/2020	16	7	22	0	0	before 2020/1/25	1	1	0	0	0	0	0	0	0	0	0	1	1	1	1	0	0	0	0	0	0	0	NA	NA	NA	NA	NA	NA	NA	1	1	1	1	0	0	1
32	1	1	66	China	1/11/2020	1/11/2020	1/21/2020	1	11	11	0	0	before 2020/1/25	0	0	0	0	0	0	0	0	0	0	0	1	1	1	0	0	0	0	0	0	0	0	NA	NA	NA	NA	NA	NA	NA	1	1	0	1	0	0	0
33	1	1	78	China	1/13/2020	1/23/2020	1/24/2020	11	2	12	0	0	before 2020/1/25	1	0	0	1	0	0	0	0	0	0	0	1	1	1	1	0	0	0	0	0	0	0	NA	NA	NA	NA	NA	NA	NA	1	1	0	0	0	0	0
34	1	1	65	China	1/12/2020	1/16/2020	1/23/2020	5	8	12	0	0	before 2020/1/25	1	0	1	1	0	0	0	0	1	0	0	1	1	1	0	0	0	1	0	0	0	0	NA	NA	NA	NA	NA	NA	NA	1	1	0	0	0	0	0
35	1	1	67	China	1/10/2020	1/15/2020	1/24/2020	6	10	15	0	0	before 2020/1/25	1	0	0	0	0	0	0	0	1	0	0	1	1	0	0	0	0	0	0	0	0	0	NA	NA	NA	NA	NA	NA	NA	1	1	0	0	0	0	0
36	1	1	58	China	12/23/2019	1/1/2020	1/23/2020	10	23	32	0	0	before 2020/1/25	0	0	0	0	0	0	0	0	0	0	0	1	1	1	0	0	0	0	0	0	0	0	NA	NA	NA	NA	NA	NA	NA	1	1	0	1	0	0	0
37	1	0	67	China	1/5/2020	1/12/2020	1/23/2020	8	12	19	0	0	before 2020/1/25	1	1	1	0	0	0	0	0	0	0	0	1	1	0	1	0	0	0	0	0	0	0	NA	NA	NA	NA	NA	NA	NA	1	1	0	0	0	0	0
38	1	0	82	China	1/10/2020	1/17/2020	1/23/2020	8	7	14	0	0	before 2020/1/25	1	1	0	0	0	0	0	0	0	0	0	1	1	0	1	1	0	0	0	0	0	0	NA	NA	NA	NA	NA	NA	NA	1	1	0	0	0	0	0
39	1	0	80	China	1/27/2020	1/27/2020	1/27/2020	1	1	1	0	0	before 2020/2/8	1	1	0	0	1	0	0	0	0	0	0	1	0	0	0	0	0	0	0	0	0	0	NA	NA	NA	NA	NA	NA	NA	1	0	0	0	0	0	1
40	1	1	79	China	1/22/2020	1/22/2020	1/25/2020	1	4	4	0	0	before 2020/1/26	1	0	0	0	0	0	0	0	1	0	0	1	0	1	1	0	0	0	0	0	0	0	NA	NA	NA	NA	NA	NA	NA	1	1	0	0	0	0	0
41	1	1	50	China	1/15/2020	1/21/2020	1/27/2020	7	7	13	0	0	2020-01-27	0	0	0	0	0	0	0	0	0	0	0	1	1	0	0	0	0	0	0	0	0	0	NA	NA	NA	NA	NA	NA	NA	1	1	0	0	0	0	0
42	1	1	85	China	1/24/2020	1/24/2020	1/28/2020	1	5	5	0	0	2020-01-28	1	0	0	1	0	0	0	0	1	1	0	1	1	1	1	0	0	0	0	0	0	0	NA	NA	NA	NA	NA	NA	NA	1	1	0	0	0	0	0
43	1	0	80	China	1/22/2020	1/22/2020	1/29/2020	1	8	8	0	0	2020-01-29	1	1	0	1	0	0	0	0	0	0	0	1	1	1	0	0	0	0	0	0	0	0	NA	NA	NA	NA	NA	NA	NA	1	0	0	1	0	1	0
44	1	1	69	China	1/24/2020	1/24/2020	1/30/2020	1	7	7	0	0	2020-01-30	1	0	1	0	0	0	0	0	0	0	0	1	0	0	1	0	0	0	0	0	0	0	NA	NA	NA	NA	NA	NA	NA	1	1	1	1	0	0	0
45	1	0	73	China	1/13/2020	1/20/2020	1/26/2020	8	7	14	0	0	before 2020/1/27	1	0	0	0	0	0	0	1	0	0	0	1	1	1	0	0	0	0	0	0	0	0	NA	NA	NA	NA	NA	NA	NA	NA	NA	NA	NA	NA	NA	NA
46	1	1	55	China	2/2/2020	2/5/2020	2/6/2020	4	2	5	0	0	2020-02-06	1	0	1	0	0	0	0	0	0	0	0	1	1	0	1	0	0	0	0	0	0	0	NA	NA	NA	NA	NA	NA	NA	NA	NA	NA	NA	NA	NA	NA
47	1	0	83	China	1/31/2020	1/31/2020	2/7/2020	1	8	8	0	0	2020-02-07	0	0	0	0	0	0	0	0	0	0	0	1	1	0	0	1	0	0	0	0	0	0	NA	NA	NA	NA	NA	NA	NA	NA	NA	NA	NA	NA	NA	NA
48	1	0	65	China	1/26/2020	1/30/2020	2/8/2020	5	10	14	0	0	2020-02-08	1	1	0	0	0	0	0	0	0	0	0	1	0	1	0	0	0	0	0	0	0	0	NA	NA	NA	NA	NA	NA	NA	1	1	0	0	0	0	0
49	1	0	85	China	1/23/2020	1/23/2020	2/8/2020	1	17	17	0	0	2020-02-08	1	1	1	1	0	0	0	0	0	0	0	1	0	0	1	0	0	0	0	0	0	0	NA	NA	NA	NA	NA	NA	NA	1	1	1	0	1	0	0
50	1	1	51	China	1/24/2020	1/24/2020	2/2/2020	1	10	10	0	0	2020-02-02	1	0	1	1	0	1	0	0	0	0	1	1	0	0	1	0	0	0	0	0	0	0	NA	NA	NA	NA	NA	NA	NA	1	0	0	0	0	1	0
51	1	0	62	China	1/21/2020	1/29/2020	1/31/2020	9	3	11	0	0	before 2020/2/1	0	0	0	0	0	0	0	0	0	0	0	1	1	1	1	0	1	0	0	0	0	0	NA	NA	NA	NA	NA	NA	NA	1	0	0	0	1	0	0
52	1	0	61	China	2/3/2020	2/7/2020	2/11/2020	5	5	9	0	0	2020-02-11	1	1	0	0	0	0	0	0	0	0	0	1	0	1	0	0	0	0	1	0	0	0	1	1	1	0	1	1	1	1	1	0	0	0	0	0
53	1	0	75	China	1/19/2020	1/28/2020	2/8/2020	10	12	21	0	0	2020-02-08	1	0	1	1	0	0	0	0	0	0	0	1	1	0	0	0	0	0	0	0	0	0	NA	NA	NA	NA	NA	NA	NA	1	0	1	1	0	1	0
54	1	1	73	China	1/26/2020	2/1/2020	2/10/2020	7	10	16	0	0	before 2020/2/11	1	1	0	0	0	1	0	1	0	0	0	1	1	0	0	0	0	0	0	0	0	0	NA	NA	NA	NA	NA	NA	NA	1	1	0	0	0	0	0
55	1	1	65	China	2/3/2020	2/3/2020	2/7/2020	1	5	5	0	0	before 2020/2/9	1	1	0	0	0	0	0	0	0	0	0	1	1	1	1	0	0	0	0	0	0	0	NA	NA	NA	NA	NA	NA	NA	1	1	0	0	0	0	0
56	1	1	87	China	1/27/2020	2/3/2020	2/9/2020	8	7	14	0	0	2020-02-09	1	1	1	1	1	0	0	0	0	0	0	1	1	1	1	0	0	0	0	0	0	0	NA	NA	NA	NA	NA	NA	NA	1	0	1	0	0	0	0
57	1	0	72	China	1/18/2020	1/22/2020	2/5/2020	5	15	19	0	0	2020-02-05	1	0	1	0	0	0	0	0	0	0	0	1	1	1	1	0	0	0	0	0	0	0	NA	NA	NA	NA	NA	NA	NA	1	1	1	1	1	0	0
58	1	0	64	China	1/18/2020	1/31/2020	2/8/2020	14	9	22	0	0	2020-02-08	0	0	0	0	0	0	0	0	0	0	0	1	0	0	1	0	0	0	0	0	0	0	NA	NA	NA	NA	NA	NA	NA	1	0	1	0	0	0	0
59	1	1	34	China	1/24/2020	1/24/2020	2/5/2020	1	13	13	0	0	2020-02-05	1	1	0	0	0	0	0	0	0	0	0	1	1	1	0	0	0	0	0	0	0	0	NA	NA	NA	NA	NA	NA	NA	NA	NA	NA	NA	NA	NA	NA
60	1	0	66	China	2/2/2020	2/2/2020	2/5/2020	1	4	4	0	0	2020-02-05	1	1	1	1	0	0	0	0	0	0	0	1	1	1	0	0	0	0	0	0	0	0	NA	NA	NA	NA	NA	NA	NA	0	0	0	0	0	0	0
61	1	1	75	China	1/30/2020	2/1/2020	2/10/2020	3	10	12	0	0	before 2020/2/11	1	1	1	0	1	0	0	1	0	0	0	1	1	0	0	0	0	0	0	0	0	0	NA	NA	NA	NA	NA	NA	NA	NA	NA	NA	NA	NA	NA	NA
62	1	0	73	China	1/28/2020	1/31/2020	2/9/2020	4	10	13	0	0	2020-02-09	0	0	0	0	0	0	0	0	0	0	0	1	1	0	0	0	0	0	0	0	0	0	NA	NA	NA	NA	NA	NA	NA	1	0	1	1	1	0	0
63	1	1	81	China	1/30/2020	2/2/2020	2/6/2020	4	5	8	0	0	2020-02-06	1	0	0	0	1	0	0	0	0	0	0	1	1	1	0	0	0	0	0	0	0	0	NA	NA	NA	NA	NA	NA	NA	1	1	0	0	1	0	0
64	1	1	65	China	2/2/2020	2/2/2020	2/11/2020	1	10	10	0	0	2020-02-11	0	0	0	0	0	0	0	0	0	0	0	1	1	1	1	0	0	0	0	0	0	0	NA	NA	NA	NA	NA	NA	NA	1	1	0	0	0	0	1
65	1	0	79	China	1/29/2020	1/29/2020	2/13/2020	1	16	16	0	0	2020-02-13	1	0	0	1	0	0	0	0	0	0	0	1	0	1	0	1	0	0	0	0	0	1	NA	NA	NA	NA	NA	NA	NA	1	0	0	0	0	1	0
66	1	0	53	China	1/23/2020	1/27/2020	2/12/2020	5	17	21	0	0	before 2020/2/13	0	0	0	0	0	0	0	0	0	0	0	1	1	1	0	0	0	1	0	0	0	0	NA	NA	NA	NA	NA	NA	NA	1	0	0	1	0	0	0
67	1	1	78	China	1/21/2020	2/2/2020	2/6/2020	13	5	17	0	0	2020-02-06	1	0	0	0	0	0	0	0	0	1	0	1	0	1	1	0	0	0	0	0	0	0	NA	NA	NA	NA	NA	NA	NA	1	1	0	0	0	0	0
68	1	1	36	China	1/18/2020	1/26/2020	2/9/2020	9	15	23	0	0	before 2020/2/10	1	1	0	0	0	0	0	0	0	0	0	1	0	1	1	0	0	0	0	0	0	0	NA	NA	NA	NA	NA	NA	NA	1	0	0	1	0	0	0
69	1	0	31	China	1/21/2020	1/23/2020	1/26/2020	3	4	6	0	0	2020-01-26	0	0	0	0	0	0	0	0	0	0	0	1	0	1	0	0	0	0	0	0	0	0	NA	NA	NA	NA	NA	NA	NA	NA	NA	NA	NA	NA	NA	NA
70	1	1	45	China	1/13/2020	1/19/2020	1/27/2020	7	9	15	0	0	2020-01-27	0	0	0	0	0	0	0	0	0	0	0	1	1	1	0	0	0	0	0	0	0	0	NA	NA	NA	NA	NA	NA	NA	NA	NA	NA	NA	NA	NA	NA
71	1	0	79	China	1/27/2020	1/27/2020	2/14/2020	1	19	19	0	0	2020-02-14	0	0	0	0	0	0	0	0	0	0	0	1	1	0	0	0	0	0	0	1	1	0	NA	NA	NA	NA	NA	NA	NA	NA	NA	NA	NA	NA	NA	NA
72	1	1	68	China	2/3/2020	2/10/2020	2/13/2020	8	4	11	0	0	2020-02-13	1	0	0	1	0	0	0	1	0	0	0	1	1	0	1	0	0	0	0	0	0	0	NA	NA	NA	NA	NA	NA	NA	1	1	0	0	1	0	0
73	1	1	65	China	1/27/2020	1/28/2020	2/14/2020	2	18	19	0	0	2020-02-14	1	1	0	0	0	0	0	0	0	0	0	1	1	0	0	0	0	0	0	0	0	0	1	1	0	0	0	0	0	NA	NA	NA	NA	NA	NA	NA
74	1	1	86	China	2/11/2020	2/14/2020	2/18/2020	4	5	8	0	0	2020/2/18	1	1	0	1	1	0	0	0	0	0	0	1	0	0	1	1	0	0	0	0	0	0	NA	NA	NA	NA	NA	NA	NA	1	1	1	0	0	0	0
75	1	1	73	China	2/4/2020	2/5/2020	2/15/2020	2	11	12	0	0	2020/2/15	1	1	0	1	0	0	0	0	0	0	0	1	1	0	0	0	0	0	0	0	0	0	NA	NA	NA	NA	NA	NA	NA	NA	NA	NA	NA	NA	NA	NA
76	1	0	64	China	1/29/2020	2/5/2020	2/15/2020	8	11	18	0	0	2020/2/15	1	0	1	0	0	0	0	0	0	0	0	1	1	1	0	0	0	0	1	0	0	0	NA	NA	NA	NA	NA	NA	NA	NA	NA	NA	NA	NA	NA	NA
77	1	1	63	China	1/20/2020	1/20/2020	2/20/2020	1	32	32	0	0	2020/2/20	1	0	1	0	0	0	0	0	0	0	0	1	1	1	1	0	0	0	0	0	0	0	1	1	1	0	1	1	0	1	0	0	1	0	1	0
78	1	1	79	China	1/31/2020	1/31/2020	2/19/2020	1	20	20	0	0	2020/2/19	1	0	0	1	0	0	1	1	0	0	0	1	1	0	1	1	0	0	0	0	0	0	NA	NA	NA	NA	NA	NA	NA	1	0	1	0	1	0	0
79	1	0	88	China	1/24/2020	1/24/2020	2/18/2020	1	26	26	0	0	2020/2/18	1	0	0	0	1	0	1	0	0	0	0	1	1	0	0	0	0	0	0	0	0	0	NA	NA	NA	NA	NA	NA	NA	1	1	0	1	0	0	0
80	1	0	73	China	2/16/2020	2/16/2020	2/24/2020	1	9	9	0	0	2020/2/24	1	1	0	1	0	0	0	0	0	0	0	1	1	0	0	0	0	0	0	0	0	0	NA	NA	NA	NA	NA	NA	NA	1	0	1	1	0	0	0
81	1	0	84	China	2/1/2020	2/7/2020	2/24/2020	7	18	24	0	0	2020/2/24	1	1	0	0	1	0	0	0	0	0	0	1	1	0	0	1	0	0	0	0	0	0	NA	NA	NA	NA	NA	NA	NA	1	1	0	0	0	0	0
82	1	1	66	China	1/3/2020	1/10/2020	2/16/2020	8	38	45	0	0	2020/2/16	1	1	0	0	0	0	0	0	0	0	0	1	1	1	0	1	0	0	0	0	0	0	NA	NA	NA	NA	NA	NA	NA	1	0	1	1	1	0	0
83	1	1	63	China	1/8/2020	1/9/2020	2/16/2020	2	39	40	0	0	2020/2/16	1	0	0	0	0	0	0	0	0	0	0	1	0	1	1	0	0	0	0	0	0	0	NA	NA	NA	NA	NA	NA	NA	1	0	1	0	1	0	0
84	1	0	79	China	2/5/2020	2/5/2020	2/20/2020	1	16	16	0	0	2020/2/20	1	1	1	1	0	0	0	0	0	0	0	1	1	1	0	0	0	0	0	0	0	0	NA	NA	NA	NA	NA	NA	NA	1	1	1	0	0	0	0
85	1	1	68	China	1/28/2020	1/28/2020	2/26/2020	1	30	30	0	0	2020/2/26	1	1	0	0	0	1	0	0	1	0	0	1	1	0	0	0	0	0	0	0	0	0	NA	NA	NA	NA	NA	NA	NA	NA	NA	NA	NA	NA	NA	NA
86	1	0	86	China	1/24/2020	2/10/2020	2/17/2020	18	8	25	0	0	2020/2/17	1	1	0	1	0	0	0	0	0	0	0	1	1	1	0	0	0	0	0	0	0	0	NA	NA	NA	NA	NA	NA	NA	NA	NA	NA	NA	NA	NA	NA
87	1	0	61	China	1/24/2020	1/29/2020	3/5/2020	6	37	42	0	0	2020/3/5	0	0	0	0	0	0	0	0	0	0	0	1	1	0	1	1	1	0	0	0	0	0	NA	NA	NA	NA	NA	NA	NA	1	1	1	1	0	0	0
88	1	1	76	China	1/21/2020	1/26/2020	1/31/2020	6	6	11	0	0	before 2020/2/1	0	0	0	0	0	0	0	0	0	0	0	1	1	1	0	1	0	0	0	0	0	0	NA	NA	NA	NA	NA	NA	NA	NA	NA	NA	NA	NA	NA	NA
89	1	1	76	China	2/4/2020	2/4/2020	2/24/2020	1	21	21	0	0	before 2020/2/25	1	1	1	0	0	0	0	0	0	0	0	1	0	0	0	0	0	0	0	0	0	1	NA	NA	NA	NA	NA	NA	NA	NA	NA	NA	NA	NA	NA	NA
90	1	0	85	China	11/26/2019	11/26/2019	1/21/2020	1	57	57	0	0	before 2020/3/3	NA	NA	NA	NA	NA	NA	NA	NA	NA	NA	NA	NA	NA	NA	NA	NA	NA	NA	NA	NA	NA	NA	NA	NA	NA	NA	NA	NA	NA	NA	NA	NA	NA	NA	NA	NA
91	1	0	65	China	1/13/2020	1/13/2020	1/23/2020	1	11	11	0	0	before 2020/3/4	NA	NA	NA	NA	NA	NA	NA	NA	NA	NA	NA	NA	NA	NA	NA	NA	NA	NA	NA	NA	NA	NA	NA	NA	NA	NA	NA	NA	NA	NA	NA	NA	NA	NA	NA	NA
92	1	1	88	China	1/22/2020	1/22/2020	1/25/2020	1	4	4	0	0	before 2020/3/5	NA	NA	NA	NA	NA	NA	NA	NA	NA	NA	NA	NA	NA	NA	NA	NA	NA	NA	NA	NA	NA	NA	NA	NA	NA	NA	NA	NA	NA	NA	NA	NA	NA	NA	NA	NA
93	1	1	69	China	NA	NA	2/5/2020	NA	NA	NA	0	0	before 2020/3/6	NA	NA	NA	NA	NA	NA	NA	NA	NA	NA	NA	NA	NA	NA	NA	NA	NA	NA	NA	NA	NA	NA	NA	NA	NA	NA	NA	NA	NA	NA	NA	NA	NA	NA	NA	NA
94	1	0	74	China	NA	1/30/2020	2/8/2020	NA	10	NA	0	0	before 2020/3/7	NA	NA	NA	NA	NA	NA	NA	NA	NA	NA	NA	NA	NA	NA	NA	NA	NA	NA	NA	NA	NA	NA	NA	NA	NA	NA	NA	NA	NA	NA	NA	NA	NA	NA	NA	NA
95	1	1	74	China	NA	1/30/2020	2/10/2020	NA	12	NA	0	0	before 2020/3/8	NA	NA	NA	NA	NA	NA	NA	NA	NA	NA	NA	NA	NA	NA	NA	NA	NA	NA	NA	NA	NA	NA	NA	NA	NA	NA	NA	NA	NA	NA	NA	NA	NA	NA	NA	NA
96	1	0	75	China	2/6/2020	2/6/2020	2/11/2020	1	6	6	0	0	before 2020/3/9	NA	NA	NA	NA	NA	NA	NA	NA	NA	NA	NA	NA	NA	NA	NA	NA	NA	NA	NA	NA	NA	NA	NA	NA	NA	NA	NA	NA	NA	NA	NA	NA	NA	NA	NA	NA
97	1	1	55	China	2/7/2020	2/7/2020	2/10/2020	1	4	4	0	0	before 2020/3/10	NA	NA	NA	NA	NA	NA	NA	NA	NA	NA	NA	NA	NA	NA	NA	NA	NA	NA	NA	NA	NA	NA	NA	NA	NA	NA	NA	NA	NA	1	1	0	0	0	0	0
98	1	1	87	China	1/30/2020	1/30/2020	2/8/2020	1	10	10	0	0	before 2020/3/11	NA	NA	NA	NA	NA	NA	NA	NA	NA	NA	NA	NA	NA	NA	NA	NA	NA	NA	NA	NA	NA	NA	NA	NA	NA	NA	NA	NA	NA	NA	NA	NA	NA	NA	NA	NA
99	1	1	79	China	2/6/2020	2/6/2020	2/9/2020	1	4	4	0	0	before 2020/3/12	NA	NA	NA	NA	NA	NA	NA	NA	NA	NA	NA	NA	NA	NA	NA	NA	NA	NA	NA	NA	NA	NA	NA	NA	NA	NA	NA	NA	NA	NA	NA	NA	NA	NA	NA	NA
100	1	1	81	China	2/1/2020	2/1/2020	2/9/2020	1	9	9	0	0	before 2020/3/13	NA	NA	NA	NA	NA	NA	NA	NA	NA	NA	NA	NA	NA	NA	NA	NA	NA	NA	NA	NA	NA	NA	NA	NA	NA	NA	NA	NA	NA	NA	NA	NA	NA	NA	NA	NA
101	1	0	79	China	1/25/2020	1/25/2020	2/9/2020	1	16	16	0	0	before 2020/3/14	NA	NA	NA	NA	NA	NA	NA	NA	NA	NA	NA	NA	NA	NA	NA	NA	NA	NA	NA	NA	NA	NA	NA	NA	NA	NA	NA	NA	NA	1	1	0	0	0	0	0
102	1	1	67	China	2/3/2020	2/3/2020	2/7/2020	1	5	5	0	0	before 2020/3/15	NA	NA	NA	NA	NA	NA	NA	NA	NA	NA	NA	NA	NA	NA	NA	NA	NA	NA	NA	NA	NA	NA	NA	NA	NA	NA	NA	NA	NA	1	1	0	0	1	0	0
103	1	0	94	China	2/6/2020	2/6/2020	2/7/2020	1	2	2	0	0	before 2020/3/16	NA	NA	NA	NA	NA	NA	NA	NA	NA	NA	NA	NA	NA	NA	NA	NA	NA	NA	NA	NA	NA	NA	NA	NA	NA	NA	NA	NA	NA	NA	NA	NA	NA	NA	NA	NA
104	1	1	82	China	2/3/2020	2/3/2020	2/10/2020	1	8	8	0	0	before 2020/3/17	NA	NA	NA	NA	NA	NA	NA	NA	NA	NA	NA	NA	NA	NA	NA	NA	NA	NA	NA	NA	NA	NA	NA	NA	NA	NA	NA	NA	NA	NA	NA	NA	NA	NA	NA	NA
105	1	0	64	China	2/5/2020	2/5/2020	2/12/2020	1	8	8	0	0	before 2020/3/18	NA	NA	NA	NA	NA	NA	NA	NA	NA	NA	NA	NA	NA	NA	NA	NA	NA	NA	NA	NA	NA	NA	NA	NA	NA	NA	NA	NA	NA	1	1	0	0	0	1	0
106	1	0	82	China	1/25/2020	1/25/2020	2/6/2020	1	13	13	0	0	before 2020/3/19	NA	NA	NA	NA	NA	NA	NA	NA	NA	NA	NA	NA	NA	NA	NA	NA	NA	NA	NA	NA	NA	NA	NA	NA	NA	NA	NA	NA	NA	1	1	1	0	0	0	0
107	1	1	87	China	2/7/2020	2/7/2020	2/12/2020	1	6	6	0	0	before 2020/3/20	NA	NA	NA	NA	NA	NA	NA	NA	NA	NA	NA	NA	NA	NA	NA	NA	NA	NA	NA	NA	NA	NA	NA	NA	NA	NA	NA	NA	NA	1	0	1	0	0	0	0
108	1	1	80	China	2/10/2020	2/10/2020	2/12/2020	1	3	3	0	0	before 2020/3/21	NA	NA	NA	NA	NA	NA	NA	NA	NA	NA	NA	NA	NA	NA	NA	NA	NA	NA	NA	NA	NA	NA	NA	NA	NA	NA	NA	NA	NA	NA	NA	NA	NA	NA	NA	NA
109	1	1	75	China	NA	NA	2/12/2020	NA	NA	NA	0	0	before 2020/3/22	NA	NA	NA	NA	NA	NA	NA	NA	NA	NA	NA	NA	NA	NA	NA	NA	NA	NA	NA	NA	NA	NA	NA	NA	NA	NA	NA	NA	NA	1	0	0	1	0	0	0
110	1	1	72	China	1/27/2020	2/1/2020	2/12/2020	6	12	17	0	0	before 2020/3/23	NA	NA	NA	NA	NA	NA	NA	NA	NA	NA	NA	NA	NA	NA	NA	NA	NA	NA	NA	NA	NA	NA	NA	NA	NA	NA	NA	NA	NA	NA	NA	NA	NA	NA	NA	NA
111	1	0	80	China	1/24/2020	1/29/2020	2/11/2020	6	14	19	0	0	before 2020/3/24	NA	NA	NA	NA	NA	NA	NA	NA	NA	NA	NA	NA	NA	NA	NA	NA	NA	NA	NA	NA	NA	NA	NA	NA	NA	NA	NA	NA	NA	NA	NA	NA	NA	NA	NA	NA
112	1	0	69	China	1/27/2020	1/27/2020	2/12/2020	1	17	17	0	0	before 2020/3/25	NA	NA	NA	NA	NA	NA	NA	NA	NA	NA	NA	NA	NA	NA	NA	NA	NA	NA	NA	NA	NA	NA	NA	NA	NA	NA	NA	NA	NA	1	1	0	0	0	0	0
113	1	1	52	China	2/6/2020	2/6/2020	2/13/2020	1	8	8	0	0	before 2020/3/26	NA	NA	NA	NA	NA	NA	NA	NA	NA	NA	NA	NA	NA	NA	NA	NA	NA	NA	NA	NA	NA	NA	NA	NA	NA	NA	NA	NA	NA	1	1	0	0	0	0	0
114	1	1	77	China	1/27/2020	1/27/2020	2/12/2020	1	17	17	0	0	before 2020/3/27	NA	NA	NA	NA	NA	NA	NA	NA	NA	NA	NA	NA	NA	NA	NA	NA	NA	NA	NA	NA	NA	NA	NA	NA	NA	NA	NA	NA	NA	1	1	0	0	0	0	0
115	1	0	76	China	2/1/2020	2/1/2020	2/21/2020	1	21	21	0	0	before 2020/3/28	NA	NA	NA	NA	NA	NA	NA	NA	NA	NA	NA	NA	NA	NA	NA	NA	NA	NA	NA	NA	NA	NA	NA	NA	NA	NA	NA	NA	NA	1	0	1	0	0	0	0
116	1	1	89	China	2/9/2020	2/10/2020	2/19/2020	2	10	11	0	0	before 2020/3/29	NA	NA	NA	NA	NA	NA	NA	NA	NA	NA	NA	NA	NA	NA	NA	NA	NA	NA	NA	NA	NA	NA	NA	NA	NA	NA	NA	NA	NA	NA	NA	NA	NA	NA	NA	NA
117	1	1	78	China	1/20/2020	1/20/2020	2/18/2020	1	30	30	0	0	before 2020/3/30	NA	NA	NA	NA	NA	NA	NA	NA	NA	NA	NA	NA	NA	NA	NA	NA	NA	NA	NA	NA	NA	NA	NA	NA	NA	NA	NA	NA	NA	1	0	0	1	1	0	0
118	1	1	82	China	1/23/2020	1/23/2020	2/24/2020	1	33	33	0	0	before 2020/3/31	NA	NA	NA	NA	NA	NA	NA	NA	NA	NA	NA	NA	NA	NA	NA	NA	NA	NA	NA	NA	NA	NA	NA	NA	NA	NA	NA	NA	NA	1	0	1	0	1	0	0
119	1	1	70	China	2/8/2020	2/8/2020	2/27/2020	1	20	20	0	0	before 2020/3/31	NA	NA	NA	NA	NA	NA	NA	NA	NA	NA	NA	NA	NA	NA	NA	NA	NA	NA	NA	NA	NA	NA	NA	NA	NA	NA	NA	NA	NA	1	1	0	0	0	0	0
120	1	1	69	China	1/18/2020	1/25/2020	2/22/2020	8	29	36	0	0	before 2020/3/31	NA	NA	NA	NA	NA	NA	NA	NA	NA	NA	NA	NA	NA	NA	NA	NA	NA	NA	NA	NA	NA	NA	NA	NA	NA	NA	NA	NA	NA	1	0	1	0	1	0	0
121	1	1	33	China	2/1/2020	2/1/2020	2/16/2020	1	16	16	0	0	before 2020/3/31	NA	NA	NA	NA	NA	NA	NA	NA	NA	NA	NA	NA	NA	NA	NA	NA	NA	NA	NA	NA	NA	NA	NA	NA	NA	NA	NA	NA	NA	NA	NA	NA	NA	NA	NA	NA
122	1	1	68	China	2/8/2020	2/8/2020	2/16/2020	1	9	9	0	0	before 2020/3/31	NA	NA	NA	NA	NA	NA	NA	NA	NA	NA	NA	NA	NA	NA	NA	NA	NA	NA	NA	NA	NA	NA	NA	NA	NA	NA	NA	NA	NA	NA	NA	NA	NA	NA	NA	NA
123	1	0	66	China	2/3/2020	2/3/2020	2/16/2020	1	14	14	0	0	before 2020/3/31	NA	NA	NA	NA	NA	NA	NA	NA	NA	NA	NA	NA	NA	NA	NA	NA	NA	NA	NA	NA	NA	NA	NA	NA	NA	NA	NA	NA	NA	NA	NA	NA	NA	NA	NA	NA
124	1	1	80	China	2/10/2020	2/10/2020	2/28/2020	1	19	19	0	0	before 2020/3/31	NA	NA	NA	NA	NA	NA	NA	NA	NA	NA	NA	NA	NA	NA	NA	NA	NA	NA	NA	NA	NA	NA	NA	NA	NA	NA	NA	NA	NA	NA	NA	NA	NA	NA	NA	NA
125	1	0	79	China	NA	NA	2/19/2020	NA	NA	NA	0	0	before 2020/3/31	NA	NA	NA	NA	NA	NA	NA	NA	NA	NA	NA	NA	NA	NA	NA	NA	NA	NA	NA	NA	NA	NA	NA	NA	NA	NA	NA	NA	NA	1	0	0	0	0	0	0
126	1	1	25	China	1/29/2020	1/29/2020	2/21/2020	1	24	24	0	0	before 2020/3/31	NA	NA	NA	NA	NA	NA	NA	NA	NA	NA	NA	NA	NA	NA	NA	NA	NA	NA	NA	NA	NA	NA	NA	NA	NA	NA	NA	NA	NA	1	0	1	0	0	0	0
127	1	1	84	China	2/9/2020	2/9/2020	2/19/2020	1	11	11	0	0	before 2020/3/31	NA	NA	NA	NA	NA	NA	NA	NA	NA	NA	NA	NA	NA	NA	NA	NA	NA	NA	NA	NA	NA	NA	NA	NA	NA	NA	NA	NA	NA	1	0	1	0	0	0	0
128	1	0	58	China	1/28/2020	1/28/2020	2/11/2020	1	15	15	0	0	before 2020/3/31	NA	NA	NA	NA	NA	NA	NA	NA	NA	NA	NA	NA	NA	NA	NA	NA	NA	NA	NA	NA	NA	NA	NA	NA	NA	NA	NA	NA	NA	1	0	1	1	0	0	0
129	1	1	77	China	1/29/2020	1/29/2020	3/11/2020	1	43	43	0	0	before 2020/3/31	NA	NA	NA	NA	NA	NA	NA	NA	NA	NA	NA	NA	NA	NA	NA	NA	NA	NA	NA	NA	NA	NA	NA	NA	NA	NA	NA	NA	NA	1	0	1	0	0	0	0
130	1	0	29	England	2020-03-24	2020-03-24	2020-04-08	1	16	16	NA	NA	2020-04-08	1	0	1	0	0	0	0	0	0	0	0	1	1	0	1	0	0	0	0	0	0	0	1	NA	NA	NA	NA	NA	NA	1	1	0	0	0	0	0
131	1	1	69	Spain	2020-02-11	2020-02-11	2020-02-13	1	3	3	NA	NA	2020-02-13	0	0	0	0	0	0	0	0	0	0	0	1	1	1	1	0	0	0	0	0	0	0	1	NA	NA	NA	NA	NA	NA	1	0	0	0	0	0	0
132	1	1	50	Denmark	NA	NA	NA	7	1	8	NA	NA	before 2020/4/13	NA	NA	NA	NA	NA	NA	NA	NA	NA	NA	NA	1	1	1	1	0	0	0	0	0	0	0	NA	NA	NA	NA	NA	NA	NA	1	1	1	0	1	0	0
133	1	0	73	America	NA	2020-02-24	NA	NA	NA	NA	NA	NA	2020-03-27	1	1	1	1	0	0	0	0	0	0	0	1	1	0	1	0	0	0	0	0	0	0	NA	NA	NA	NA	NA	NA	NA	NA	NA	NA	NA	NA	NA	NA
134	1	1	68	France	NA	NA	NA	NA	NA	NA	0	0	before 2020/4/27	1	1	0	1	0	0	0	0	0	0	0	1	1	1	0	0	0	0	1	0	0	0	NA	NA	NA	NA	NA	NA	NA	NA	NA	NA	NA	NA	NA	NA
135	1	1	78	France	NA	NA	NA	NA	NA	NA	0	0	before 2020/4/27	1	1	0	1	0	0	0	0	0	0	0	1	1	1	0	0	0	0	1	0	0	0	NA	NA	NA	NA	NA	NA	NA	NA	NA	NA	NA	NA	NA	NA
136	1	1	84	France	NA	2020-03-25	2020-04-12	NA	19	NA	0	0	2020-04-12	1	1	1	1	0	0	0	0	0	0	0	1	1	1	1	0	0	0	0	0	0	0	NA	NA	NA	NA	NA	NA	NA	1	0	0	0	1	0	0
137	1	0	87	Germany	NA	NA	NA	NA	NA	NA	NA	NA	2020/3/13-2020/4/24	1	0	0	1	0	0	0	0	0	1	0	1	0	0	0	0	0	0	0	0	0	0	NA	NA	NA	NA	NA	NA	NA	NA	NA	NA	NA	NA	NA	NA
138	1	0	85	Germany	NA	NA	NA	NA	NA	NA	NA	NA	2020/3/13-2020/4/24	1	0	0	1	0	0	0	0	0	0	0	1	0	0	0	0	0	0	0	0	0	0	NA	NA	NA	NA	NA	NA	NA	NA	NA	NA	NA	NA	NA	NA
139	1	1	88	Germany	NA	NA	NA	NA	NA	NA	NA	NA	2020/3/13-2020/4/24	1	0	0	1	0	0	0	0	0	0	0	1	0	0	0	0	0	0	0	0	0	0	NA	NA	NA	NA	NA	NA	NA	NA	NA	NA	NA	NA	NA	NA
140	1	1	75	Germany	NA	NA	NA	NA	NA	NA	NA	NA	2020/3/13-2020/4/24	1	1	0	1	0	0	0	0	0	0	0	1	0	0	0	0	0	0	0	0	0	0	NA	NA	NA	NA	NA	NA	NA	NA	NA	NA	NA	NA	NA	NA
141	1	0	86	Germany	NA	NA	NA	NA	NA	NA	NA	NA	2020/3/13-2020/4/24	1	0	0	1	0	0	0	0	0	1	0	1	0	0	0	0	0	0	0	0	0	0	NA	NA	NA	NA	NA	NA	NA	NA	NA	NA	NA	NA	NA	NA
142	1	1	90	Germany	NA	NA	NA	NA	NA	NA	NA	NA	2020/3/13-2020/4/24	1	0	1	1	0	0	0	0	0	0	0	1	0	0	0	0	0	0	0	0	0	0	NA	NA	NA	NA	NA	NA	NA	NA	NA	NA	NA	NA	NA	NA
143	1	1	90	Germany	NA	NA	NA	NA	NA	NA	NA	NA	2020/3/13-2020/4/24	1	0	0	1	0	0	0	0	0	1	0	1	0	0	0	0	0	0	0	0	0	0	NA	NA	NA	NA	NA	NA	NA	NA	NA	NA	NA	NA	NA	NA
144	1	1	77	Germany	NA	NA	NA	NA	NA	NA	NA	NA	2020/3/13-2020/4/24	0	0	0	0	0	0	0	0	0	0	0	1	0	0	0	0	0	0	0	0	0	0	NA	NA	NA	NA	NA	NA	NA	NA	NA	NA	NA	NA	NA	NA
145	1	1	76	Germany	NA	NA	NA	NA	NA	NA	NA	NA	2020/3/13-2020/4/24	1	0	0	0	0	0	0	0	0	1	0	1	0	0	0	0	0	0	0	0	0	0	NA	NA	NA	NA	NA	NA	NA	NA	NA	NA	NA	NA	NA	NA
146	1	1	76	Germany	NA	NA	NA	NA	NA	NA	NA	NA	2020/3/13-2020/4/24	1	0	0	0	0	0	0	1	0	0	0	1	0	0	0	0	0	0	0	0	0	0	NA	NA	NA	NA	NA	NA	NA	NA	NA	NA	NA	NA	NA	NA
147	1	1	70	Germany	NA	NA	NA	NA	NA	NA	NA	NA	2020/3/13-2020/4/24	1	0	0	1	0	0	0	0	0	1	0	1	0	0	0	0	0	0	0	0	0	0	NA	NA	NA	NA	NA	NA	NA	NA	NA	NA	NA	NA	NA	NA
148	1	1	93	Germany	NA	NA	NA	NA	NA	NA	NA	NA	2020/3/13-2020/4/24	1	1	1	0	0	0	0	0	0	0	0	1	0	0	0	0	0	0	0	0	0	0	NA	NA	NA	NA	NA	NA	NA	NA	NA	NA	NA	NA	NA	NA
149	1	1	66	Germany	NA	NA	NA	NA	NA	NA	NA	NA	2020/3/13-2020/4/24	1	0	1	1	0	0	0	0	0	0	0	1	0	0	0	0	0	0	0	0	0	0	NA	NA	NA	NA	NA	NA	NA	NA	NA	NA	NA	NA	NA	NA
150	1	0	54	Germany	NA	NA	NA	NA	NA	NA	NA	NA	2020/3/13-2020/4/24	0	0	0	0	0	0	0	0	0	0	0	1	0	0	0	0	0	0	0	0	0	0	NA	NA	NA	NA	NA	NA	NA	NA	NA	NA	NA	NA	NA	NA
151	1	1	82	Germany	NA	NA	NA	NA	NA	NA	NA	NA	2020/3/13-2020/4/24	1	0	1	1	0	0	0	0	0	0	0	1	0	0	0	0	0	0	0	0	0	0	NA	NA	NA	NA	NA	NA	NA	NA	NA	NA	NA	NA	NA	NA
152	1	1	86	Germany	NA	NA	NA	NA	NA	NA	NA	NA	2020/3/13-2020/4/24	1	0	0	1	0	0	0	0	0	0	0	1	0	0	0	0	0	0	0	0	0	0	NA	NA	NA	NA	NA	NA	NA	NA	NA	NA	NA	NA	NA	NA
153	1	0	87	Germany	NA	NA	NA	NA	NA	NA	NA	NA	2020/3/13-2020/4/24	1	0	0	1	0	0	0	0	0	1	0	1	0	0	0	0	0	0	0	0	0	0	NA	NA	NA	NA	NA	NA	NA	NA	NA	NA	NA	NA	NA	NA
154	1	0	70	Germany	NA	NA	NA	NA	NA	NA	NA	NA	2020/3/13-2020/4/24	1	0	0	1	0	0	0	0	0	0	0	1	0	0	0	0	0	0	0	0	0	0	NA	NA	NA	NA	NA	NA	NA	NA	NA	NA	NA	NA	NA	NA
155	1	0	75	Germany	NA	NA	NA	NA	NA	NA	NA	NA	2020/3/13-2020/4/24	1	0	0	1	0	0	0	0	0	0	0	1	0	0	0	0	0	0	0	0	0	0	NA	NA	NA	NA	NA	NA	NA	NA	NA	NA	NA	NA	NA	NA
156	1	1	93	Germany	NA	NA	NA	NA	NA	NA	NA	NA	2020/3/13-2020/4/24	1	0	1	1	0	0	0	0	0	0	0	1	0	0	0	0	0	0	0	0	0	0	NA	NA	NA	NA	NA	NA	NA	NA	NA	NA	NA	NA	NA	NA
157	1	0	82	Germany	NA	NA	NA	NA	NA	NA	NA	NA	2020/3/13-2020/4/24	1	0	0	0	0	0	0	0	0	1	0	1	0	0	0	0	0	0	0	0	0	0	NA	NA	NA	NA	NA	NA	NA	NA	NA	NA	NA	NA	NA	NA
158	1	1	63	Germany	NA	NA	NA	NA	NA	NA	NA	NA	2020/3/13-2020/4/24	1	0	0	1	0	0	0	0	0	0	0	1	0	0	0	0	0	0	0	0	0	0	NA	NA	NA	NA	NA	NA	NA	NA	NA	NA	NA	NA	NA	NA
159	1	1	84	Germany	NA	NA	NA	NA	NA	NA	NA	NA	2020/3/13-2020/4/24	1	1	1	1	0	0	0	0	0	0	0	1	0	0	0	0	0	0	0	0	0	0	NA	NA	NA	NA	NA	NA	NA	NA	NA	NA	NA	NA	NA	NA
160	1	1	71	Germany	NA	NA	NA	NA	NA	NA	NA	NA	2020/3/13-2020/4/24	1	0	1	1	0	0	0	0	0	0	0	1	0	0	0	0	0	0	0	0	0	0	NA	NA	NA	NA	NA	NA	NA	NA	NA	NA	NA	NA	NA	NA
161	1	1	75	Germany	NA	NA	NA	NA	NA	NA	NA	NA	2020/3/13-2020/4/24	0	0	0	0	0	0	0	0	0	0	0	1	0	0	0	0	0	0	0	0	0	0	NA	NA	NA	NA	NA	NA	NA	NA	NA	NA	NA	NA	NA	NA
162	1	1	52	Germany	NA	NA	NA	NA	NA	NA	NA	NA	2020/3/13-2020/4/24	1	0	0	1	0	0	0	0	0	0	0	1	0	0	0	0	0	0	0	0	0	0	NA	NA	NA	NA	NA	NA	NA	NA	NA	NA	NA	NA	NA	NA
163	1	1	85	Germany	NA	NA	NA	NA	NA	NA	NA	NA	2020/3/13-2020/4/24	1	1	0	1	0	0	0	0	0	1	0	1	0	0	0	0	0	0	0	0	0	0	NA	NA	NA	NA	NA	NA	NA	NA	NA	NA	NA	NA	NA	NA
164	1	0	75	Germany	NA	NA	NA	NA	NA	NA	NA	NA	2020/3/13-2020/4/24	1	1	0	1	0	0	0	0	0	0	0	1	0	0	0	0	0	0	0	0	0	0	NA	NA	NA	NA	NA	NA	NA	NA	NA	NA	NA	NA	NA	NA
165	1	1	59	Germany	NA	NA	NA	NA	NA	NA	NA	NA	2020/3/13-2020/4/24	1	0	0	1	0	0	0	0	0	0	0	1	0	0	0	0	0	0	0	0	0	0	NA	NA	NA	NA	NA	NA	NA	NA	NA	NA	NA	NA	NA	NA
166	1	1	85	Germany	NA	NA	NA	NA	NA	NA	NA	NA	2020/3/13-2020/4/24	1	0	0	1	0	0	0	1	0	1	0	1	0	0	0	0	0	0	0	0	0	0	NA	NA	NA	NA	NA	NA	NA	NA	NA	NA	NA	NA	NA	NA
167	1	0	76	Germany	NA	NA	NA	NA	NA	NA	NA	NA	2020/3/13-2020/4/24	1	1	0	0	0	0	0	1	0	0	0	1	0	0	0	0	0	0	0	0	0	0	NA	NA	NA	NA	NA	NA	NA	NA	NA	NA	NA	NA	NA	NA
168	1	1	73	Germany	NA	NA	NA	NA	NA	NA	NA	NA	2020/3/13-2020/4/24	1	0	0	1	0	0	0	0	0	0	0	1	0	0	0	0	0	0	0	0	0	0	NA	NA	NA	NA	NA	NA	NA	NA	NA	NA	NA	NA	NA	NA
169	1	1	70	Germany	NA	NA	NA	NA	NA	NA	NA	NA	2020/3/13-2020/4/24	1	1	0	1	0	0	0	0	0	0	0	1	0	0	0	0	0	0	0	0	0	0	NA	NA	NA	NA	NA	NA	NA	NA	NA	NA	NA	NA	NA	NA
170	1	0	90	Germany	NA	NA	NA	NA	NA	NA	NA	NA	2020/3/13-2020/4/24	1	0	0	1	0	0	0	0	0	0	0	1	0	0	0	0	0	0	0	0	0	0	NA	NA	NA	NA	NA	NA	NA	NA	NA	NA	NA	NA	NA	NA
171	1	0	94	Germany	NA	NA	NA	NA	NA	NA	NA	NA	2020/3/13-2020/4/24	1	0	0	1	0	0	0	0	0	0	0	1	0	0	0	0	0	0	0	0	0	0	NA	NA	NA	NA	NA	NA	NA	NA	NA	NA	NA	NA	NA	NA
172	1	0	87	Germany	NA	NA	NA	NA	NA	NA	NA	NA	2020/3/13-2020/4/24	1	0	0	0	0	0	0	1	0	0	0	1	0	0	0	0	0	0	0	0	0	0	NA	NA	NA	NA	NA	NA	NA	NA	NA	NA	NA	NA	NA	NA
173	1	0	54	Germany	NA	NA	NA	NA	NA	NA	NA	NA	2020/3/13-2020/4/24	1	0	0	1	0	0	0	0	0	0	0	1	0	0	0	0	0	0	0	0	0	0	NA	NA	NA	NA	NA	NA	NA	NA	NA	NA	NA	NA	NA	NA
174	1	0	79	Germany	NA	NA	NA	NA	NA	NA	NA	NA	2020/3/13-2020/4/24	1	0	0	1	0	0	0	0	0	1	0	1	0	0	0	0	0	0	0	0	0	0	NA	NA	NA	NA	NA	NA	NA	NA	NA	NA	NA	NA	NA	NA
175	1	1	51	Germany	NA	NA	NA	NA	NA	NA	NA	NA	2020/3/13-2020/4/24	0	0	0	0	0	0	0	0	0	0	0	1	0	0	0	0	0	0	0	0	0	0	NA	NA	NA	NA	NA	NA	NA	NA	NA	NA	NA	NA	NA	NA
176	1	1	85	Germany	NA	NA	NA	NA	NA	NA	NA	NA	2020/3/13-2020/4/24	1	1	0	1	0	0	0	0	0	0	0	1	0	0	0	0	0	0	0	0	0	0	NA	NA	NA	NA	NA	NA	NA	NA	NA	NA	NA	NA	NA	NA
177	1	1	56	Germany	NA	NA	NA	NA	NA	NA	NA	NA	2020/3/13-2020/4/24	1	0	1	1	0	0	0	0	0	1	0	1	0	0	0	0	0	0	0	0	0	0	NA	NA	NA	NA	NA	NA	NA	NA	NA	NA	NA	NA	NA	NA
178	1	1	76	Germany	NA	NA	NA	NA	NA	NA	NA	NA	2020/3/13-2020/4/24	1	0	0	1	0	0	0	1	0	0	0	1	0	0	0	0	0	0	0	0	0	0	NA	NA	NA	NA	NA	NA	NA	NA	NA	NA	NA	NA	NA	NA
179	1	0	59	Germany	NA	NA	NA	NA	NA	NA	NA	NA	2020/3/13-2020/4/24	1	0	0	0	0	0	0	1	0	0	0	1	0	0	0	0	0	0	0	0	0	0	NA	NA	NA	NA	NA	NA	NA	NA	NA	NA	NA	NA	NA	NA
180	1	1	51	Greece	NA	NA	NA	NA	NA	NA	0	0	before 2020/4/12	1	1	0	0	0	0	0	0	0	0	0	1	1	0	0	0	0	0	0	0	0	0	NA	NA	NA	NA	NA	NA	NA	NA	NA	NA	NA	NA	NA	NA
181	1	1	74	Greece	NA	NA	NA	NA	NA	NA	0	0	before 2020/4/12	1	1	1	0	0	0	0	0	0	0	0	1	1	0	0	0	0	0	0	0	0	0	NA	NA	NA	NA	NA	NA	NA	NA	NA	NA	NA	NA	NA	NA
182	1	1	84	Greece	NA	NA	NA	NA	NA	NA	0	0	before 2020/4/12	1	0	0	1	0	0	0	0	0	1	0	1	1	0	0	0	0	0	0	0	0	0	NA	NA	NA	NA	NA	NA	NA	NA	NA	NA	NA	NA	NA	NA
183	1	1	83	Italy	NA	NA	NA	NA	10	NA	NA	NA	2020-04-04	1	1	0	1	0	0	0	0	0	1	0	1	1	1	1	0	0	0	0	0	0	0	NA	NA	NA	NA	NA	NA	NA	1	1	0	0	0	0	0
184	1	1	84	Italy	NA	NA	NA	NA	NA	13	0	0	before 2020/3/27	1	1	1	1	1	0	0	0	0	0	0	1	0	0	1	0	0	0	0	0	0	0	0	0	0	0	0	0	1	1	0	0	0	1	0	0
185	1	0	85	Italy	NA	NA	NA	NA	NA	36	0	0	before 2020/3/27	1	1	1	1	0	0	0	0	0	1	0	1	0	1	1	0	0	0	0	0	0	0	1	0	0	0	0	0	1	1	0	0	0	1	0	0
186	1	1	70	Italy	NA	NA	NA	NA	NA	14	0	0	before 2020/3/27	1	1	0	0	0	0	0	0	0	0	0	1	1	1	1	0	0	0	0	0	0	0	1	0	0	0	0	0	0	1	0	0	0	1	0	0
187	1	0	91	Spain	NA	NA	NA	NA	NA	NA	0	0	2020/3/15-2020/4/30	1	0	1	1	0	0	0	0	0	0	0	1	1	1	0	0	0	0	0	0	0	0	NA	NA	NA	NA	NA	NA	NA	0	0	0	0	0	0	0
188	1	1	78	Spain	NA	NA	NA	NA	NA	NA	0	0	2020/3/15-2020/4/30	1	0	1	0	0	0	0	1	0	0	0	1	1	1	0	0	0	1	0	0	0	0	NA	NA	NA	NA	NA	NA	NA	0	0	0	0	0	0	0
189	1	0	75	Spain	NA	NA	NA	NA	NA	NA	0	0	2020/3/15-2020/4/30	1	0	0	1	0	0	0	0	0	0	0	1	0	1	0	0	0	0	0	0	0	0	NA	NA	NA	NA	NA	NA	NA	0	0	0	0	0	0	0
190	1	0	82	Spain	NA	NA	NA	NA	NA	NA	0	0	2020/3/15-2020/4/30	1	0	1	1	0	0	0	0	0	0	0	1	1	1	0	0	0	1	0	0	0	0	NA	NA	NA	NA	NA	NA	NA	1	0	0	0	1	0	0
191	1	0	66	Spain	NA	NA	NA	NA	NA	NA	0	0	2020/3/15-2020/4/30	1	0	1	0	0	0	0	1	0	0	0	1	0	0	0	0	0	0	0	0	0	0	NA	NA	NA	NA	NA	NA	NA	0	0	0	0	0	0	0
192	1	0	79	Spain	NA	NA	NA	NA	NA	NA	0	0	2020/3/15-2020/4/30	1	0	0	1	0	0	0	0	0	0	0	1	1	1	0	0	0	0	0	0	0	0	NA	NA	NA	NA	NA	NA	NA	0	0	0	0	0	0	0
193	1	0	89	Spain	NA	NA	NA	NA	NA	NA	0	0	2020/3/15-2020/4/30	1	0	1	1	0	0	0	0	0	0	0	1	1	0	0	0	0	0	0	0	0	0	NA	NA	NA	NA	NA	NA	NA	0	0	0	0	0	0	0
194	1	0	84	Spain	NA	NA	NA	NA	NA	NA	0	0	2020/3/15-2020/4/30	1	0	1	0	0	0	0	1	0	0	0	1	0	0	0	0	0	0	0	0	0	0	NA	NA	NA	NA	NA	NA	NA	0	0	0	0	0	0	0
195	1	1	78	Spain	NA	NA	NA	NA	NA	NA	0	0	2020/3/15-2020/4/30	1	0	1	1	0	0	0	0	0	0	0	1	1	0	0	0	0	0	0	0	0	0	NA	NA	NA	NA	NA	NA	NA	0	0	0	0	0	0	0
196	1	1	90	Spain	NA	NA	NA	NA	NA	NA	0	0	2020/3/15-2020/4/30	1	0	0	1	0	0	0	0	0	0	0	1	0	0	0	0	0	0	0	0	0	0	NA	NA	NA	NA	NA	NA	NA	0	0	0	0	0	0	0
197	1	0	65	Spain	NA	NA	NA	NA	NA	NA	0	0	2020/3/15-2020/4/30	1	0	1	0	0	0	0	0	0	0	0	1	1	0	0	0	0	0	0	0	0	0	NA	NA	NA	NA	NA	NA	NA	0	0	0	0	0	0	0
198	1	1	91	Spain	NA	NA	NA	NA	NA	NA	0	0	2020/3/15-2020/4/30	1	0	0	1	0	0	0	0	0	0	0	1	1	1	0	0	0	0	0	0	0	0	NA	NA	NA	NA	NA	NA	NA	0	0	0	0	0	0	0
199	1	0	52	Spain	NA	NA	NA	NA	NA	NA	0	0	2020/3/15-2020/4/30	0	0	0	0	0	0	0	0	0	0	0	1	1	0	0	0	0	0	0	0	0	0	NA	NA	NA	NA	NA	NA	NA	0	0	0	0	0	0	0
200	1	1	86	Spain	NA	NA	NA	NA	NA	NA	0	0	2020/3/15-2020/4/30	1	0	1	1	0	0	0	0	0	0	0	1	0	0	0	0	0	0	0	0	0	0	NA	NA	NA	NA	NA	NA	NA	0	0	0	0	0	0	0
201	1	1	71	Spain	NA	NA	NA	NA	NA	NA	0	0	2020/3/15-2020/4/30	1	0	1	0	0	0	0	0	0	0	0	1	0	0	0	0	0	0	0	0	0	0	NA	NA	NA	NA	NA	NA	NA	1	0	0	0	1	0	0
202	1	1	73	Spain	NA	NA	NA	NA	NA	NA	0	0	2020/3/15-2020/4/30	1	0	0	0	0	0	0	1	0	0	0	1	1	0	0	0	0	0	0	0	0	0	NA	NA	NA	NA	NA	NA	NA	0	0	0	0	0	0	0
203	1	1	82	Spain	NA	NA	NA	NA	NA	NA	0	0	2020/3/15-2020/4/30	1	0	0	1	0	0	0	0	0	0	0	1	1	0	0	0	0	1	0	0	0	0	NA	NA	NA	NA	NA	NA	NA	0	0	0	0	0	0	0
204	1	1	87	Spain	NA	NA	NA	NA	NA	NA	0	0	2020/3/15-2020/4/30	1	0	1	1	0	0	0	0	0	0	0	1	1	0	0	0	0	0	0	0	0	0	NA	NA	NA	NA	NA	NA	NA	0	0	0	0	0	0	0
205	1	1	83	Spain	NA	NA	NA	NA	NA	NA	0	0	2020/3/15-2020/4/30	1	0	0	1	0	0	0	1	0	0	0	1	0	0	0	0	0	0	0	0	0	0	NA	NA	NA	NA	NA	NA	NA	0	0	0	0	0	0	0
206	1	0	95	Spain	NA	NA	NA	NA	NA	NA	0	0	2020/3/15-2020/4/30	1	0	0	1	0	0	0	1	0	0	0	1	0	0	0	0	0	0	0	0	0	0	NA	NA	NA	NA	NA	NA	NA	0	0	0	0	0	0	0
207	1	1	91	Spain	NA	NA	NA	NA	NA	NA	0	0	2020/3/15-2020/4/30	1	0	1	1	0	0	0	0	0	0	0	1	0	0	0	0	0	0	0	0	0	0	NA	NA	NA	NA	NA	NA	NA	0	0	0	0	0	0	0
208	1	0	89	Spain	NA	NA	NA	NA	NA	NA	0	0	2020/3/15-2020/4/30	1	0	0	1	0	0	0	0	0	0	0	1	1	1	0	0	0	0	0	0	0	0	NA	NA	NA	NA	NA	NA	NA	0	0	0	0	0	0	0
209	1	1	63	Spain	NA	NA	NA	NA	NA	NA	0	0	2020/3/15-2020/4/30	1	0	0	0	0	0	0	1	0	0	0	1	1	0	0	0	0	1	0	0	0	0	NA	NA	NA	NA	NA	NA	NA	0	0	0	0	0	0	0
210	1	1	71	Spain	NA	NA	NA	NA	NA	NA	0	0	2020/3/15-2020/4/30	1	0	0	1	0	0	0	1	0	0	0	1	1	1	0	0	0	0	0	0	0	0	NA	NA	NA	NA	NA	NA	NA	0	0	0	0	0	0	0
211	1	1	67	Spain	NA	NA	NA	NA	NA	NA	0	0	2020/3/15-2020/4/30	1	0	1	1	0	0	0	0	0	0	0	1	1	0	0	0	0	0	0	0	0	0	NA	NA	NA	NA	NA	NA	NA	0	0	0	0	0	0	0
212	1	1	42	France	NA	NA	NA	NA	NA	NA	0	0	2020/3/19-2020/4/19	NA	NA	NA	NA	NA	NA	NA	NA	NA	NA	NA	1	0	1	0	0	0	0	0	0	0	0	NA	NA	NA	NA	NA	NA	NA	NA	NA	NA	NA	NA	NA	NA
213	1	0	60	France	NA	NA	NA	NA	NA	NA	0	0	2020/3/19-2020/4/19	NA	NA	NA	NA	NA	NA	NA	NA	NA	NA	NA	1	0	0	0	0	0	0	0	0	0	0	NA	NA	NA	NA	NA	NA	NA	NA	NA	NA	NA	NA	NA	NA
214	1	1	50	France	NA	NA	NA	NA	NA	NA	0	0	2020/3/19-2020/4/19	NA	NA	NA	NA	NA	NA	NA	NA	NA	NA	NA	1	0	0	0	0	0	0	0	0	0	0	NA	NA	NA	NA	NA	NA	NA	NA	NA	NA	NA	NA	NA	NA
215	1	0	5	Italy	2020-03-25	2020-03-27	NA	3	NA	NA	0	0	before 2020/4/30	NA	NA	NA	NA	NA	NA	NA	NA	NA	NA	NA	1	1	0	0	0	0	0	0	0	0	0	1	NA	NA	NA	NA	NA	NA	1	0	0	0	1	0	0
216	1	0	73	Albania	NA	NA	3/11/2020	NA	NA	NA	NA	NA	3/11/2020	NA	NA	NA	NA	NA	NA	NA	NA	NA	NA	NA	NA	NA	NA	NA	NA	NA	NA	NA	NA	NA	NA	NA	NA	NA	NA	NA	NA	NA	NA	NA	NA	NA	NA	NA	NA
217	1	0	71	Albania	NA	NA	3/26/2020	NA	NA	NA	NA	NA	3/26/2020	NA	NA	NA	NA	NA	NA	NA	NA	NA	NA	NA	NA	NA	NA	NA	NA	NA	NA	NA	NA	NA	NA	NA	NA	NA	NA	NA	NA	NA	NA	NA	NA	NA	NA	NA	NA
218	1	0	85	Albania	NA	NA	3/27/2020	NA	NA	NA	NA	NA	3/27/2020	NA	NA	NA	NA	NA	NA	NA	NA	NA	NA	NA	NA	NA	NA	NA	NA	NA	NA	NA	NA	NA	NA	NA	NA	NA	NA	NA	NA	NA	NA	NA	NA	NA	NA	NA	NA
219	1	1	66	Albania	NA	NA	3/27/2020	NA	NA	NA	NA	NA	3/27/2020	NA	NA	NA	NA	NA	NA	NA	NA	NA	NA	NA	NA	NA	NA	NA	NA	NA	NA	NA	NA	NA	NA	NA	NA	NA	NA	NA	NA	NA	NA	NA	NA	NA	NA	NA	NA
220	1	0	82	Albania	NA	NA	3/31/2020	NA	NA	NA	NA	NA	3/31/2020	NA	NA	NA	NA	NA	NA	NA	NA	NA	NA	NA	NA	NA	NA	NA	NA	NA	NA	NA	NA	NA	NA	NA	NA	NA	NA	NA	NA	NA	NA	NA	NA	NA	NA	NA	NA
221	1	1	57	America	NA	NA	NA	4	NA	10	NA	NA	before 2020/3	1	1	1	0	0	0	0	0	0	0	0	1	1	1	1	1	0	1	0	0	0	0	1	0	1	0	0	0	0	NA	NA	NA	NA	NA	NA	NA
222	1	1	54	America	NA	NA	NA	1	NA	2	NA	NA	before 2020/3	1	0	0	0	1	0	0	1	0	0	0	1	1	0	1	0	0	0	0	0	0	0	1	0	1	0	0	0	0	NA	NA	NA	NA	NA	NA	NA
223	1	1	84	America	NA	NA	NA	1	NA	1	NA	NA	before 2020/3	1	1	0	1	0	0	0	0	0	1	0	1	0	0	1	0	0	0	0	0	0	0	1	0	0	0	0	0	0	NA	NA	NA	NA	NA	NA	NA
224	1	1	74	America	NA	NA	NA	1	NA	1	NA	NA	before 2020/3	1	1	0	1	1	0	0	0	0	0	0	1	1	1	1	0	0	0	0	0	0	0	1	0	0	0	0	0	0	NA	NA	NA	NA	NA	NA	NA
225	1	0	73	America	NA	NA	NA	5	NA	13	NA	NA	before 2020/3	1	1	1	1	0	0	0	0	0	0	0	1	1	1	1	0	0	0	0	0	0	0	1	0	0	0	0	0	0	NA	NA	NA	NA	NA	NA	NA
226	1	0	84	America	NA	NA	NA	1	NA	2	NA	NA	before 2020/3	1	1	0	1	0	0	0	0	0	1	0	1	0	0	1	0	0	0	0	0	0	0	1	0	0	0	0	0	1	NA	NA	NA	NA	NA	NA	NA
227	1	1	71	America	NA	NA	NA	7	NA	13	NA	NA	before 2020/3	1	1	0	1	0	0	0	0	0	0	0	1	0	1	1	0	0	0	0	0	0	0	1	0	0	0	0	0	0	NA	NA	NA	NA	NA	NA	NA
228	1	0	75	America	NA	NA	NA	3	NA	12	NA	NA	before 2020/3	1	0	1	1	0	0	0	0	0	1	0	1	1	0	1	0	0	0	0	0	0	0	0	0	0	0	0	0	0	NA	NA	NA	NA	NA	NA	NA
229	1	0	42	America	NA	NA	NA	5	NA	14	NA	NA	before 2020/3	1	0	0	0	0	0	0	1	0	0	0	1	1	0	0	0	0	0	0	1	0	0	1	0	0	0	0	0	0	NA	NA	NA	NA	NA	NA	NA
230	1	1	71	America	NA	NA	NA	1	NA	4	NA	NA	before 2020/3	1	1	0	1	1	0	0	0	0	0	0	1	0	0	1	0	0	0	0	0	0	0	0	0	0	0	0	0	0	NA	NA	NA	NA	NA	NA	NA
231	1	0	73	America	NA	NA	NA	2	NA	23	NA	NA	before 2020/3	1	1	1	0	0	0	0	0	0	0	0	1	0	0	1	0	0	0	0	0	0	0	0	0	0	0	0	0	0	NA	NA	NA	NA	NA	NA	NA
232	1	1	34	America	NA	NA	NA	1	NA	NA	NA	NA	before 2020/4/21	1	1	1	1	0	0	0	0	0	0	0	1	1	1	1	0	0	0	0	1	0	0	1	1	0	1	0	0	0	NA	NA	NA	NA	NA	NA	NA
233	1	1	77	America	NA	NA	NA	NA	NA	NA	NA	NA	before 2020/4/21	1	1	0	0	0	0	0	0	0	0	0	1	1	0	0	0	0	1	0	0	0	0	NA	NA	NA	NA	NA	NA	NA	NA	NA	NA	NA	NA	NA	NA
234	1	1	42	America	NA	NA	NA	NA	NA	NA	NA	NA	before 2020/4/21	1	0	0	0	0	0	0	0	0	0	0	1	1	1	1	0	0	0	0	0	0	0	NA	NA	NA	NA	NA	NA	NA	NA	NA	NA	NA	NA	NA	NA
235	1	1	62	America	NA	NA	NA	NA	NA	NA	NA	NA	before 2020/4/21	NA	NA	NA	NA	NA	NA	NA	NA	NA	NA	NA	NA	NA	NA	NA	NA	NA	NA	NA	NA	NA	NA	NA	NA	NA	NA	NA	NA	NA	NA	NA	NA	NA	NA	NA	NA
236	1	1	48	America	NA	NA	NA	NA	NA	NA	NA	NA	before 2020/4/21	NA	NA	NA	NA	NA	NA	NA	NA	NA	NA	NA	NA	NA	NA	NA	NA	NA	NA	NA	NA	NA	NA	NA	NA	NA	NA	NA	NA	NA	NA	NA	NA	NA	NA	NA	NA
237	1	1	72	America	NA	NA	NA	NA	8	NA	0	0	before 2020/5/5	1	1	1	0	0	0	0	0	0	0	0	1	0	1	1	0	0	0	0	0	0	0	1	0	0	0	0	0	0	NA	NA	NA	NA	NA	NA	NA
238	1	0	31	America	NA	NA	NA	5	NA	16	0	0	before 2020/9/9	NA	NA	NA	NA	NA	NA	NA	NA	NA	NA	NA	1	0	0	1	0	0	0	0	0	0	0	1	0	0	0	0	0	0	NA	NA	NA	NA	NA	NA	NA
239	1	1	49	America	NA	NA	NA	7	NA	11	NA	NA	before 2020/6/8	1	0	0	1	0	0	0	0	0	0	0	1	1	1	1	0	0	0	0	0	0	0	1	1	0	0	0	0	0	NA	NA	NA	NA	NA	NA	NA
240	1	0	81	America	NA	NA	NA	NA	NA	9	NA	1	before 2020/6/8	1	1	0	0	0	0	0	0	0	0	0	1	0	0	0	1	0	0	1	0	0	1	1	1	0	0	0	0	0	NA	NA	NA	NA	NA	NA	NA
241	1	0	47	America	NA	NA	NA	14	NA	12	NA	0	before 2020/6/8	1	0	1	0	1	0	0	0	0	0	0	1	1	1	1	1	0	0	0	0	0	0	1	1	0	0	0	0	0	NA	NA	NA	NA	NA	NA	NA
242	1	0	76	America	NA	NA	NA	NA	NA	21	NA	NA	before 2020/6/8	1	1	0	0	0	0	0	0	0	0	0	1	1	0	1	0	0	0	0	0	0	0	1	0	0	0	0	0	0	NA	NA	NA	NA	NA	NA	NA
243	1	0	57	America	NA	NA	2/6/2020	NA	NA	NA	NA	NA	2/6/2020	NA	NA	NA	NA	NA	NA	NA	NA	NA	NA	NA	NA	NA	NA	NA	NA	NA	NA	NA	NA	NA	NA	NA	NA	NA	NA	NA	NA	NA	NA	NA	NA	NA	NA	NA	NA
244	1	1	54	America	NA	NA	2/26/2020	NA	NA	NA	NA	NA	2/26/2020	NA	NA	NA	NA	NA	NA	NA	NA	NA	NA	NA	NA	NA	NA	NA	NA	NA	NA	NA	NA	NA	NA	NA	NA	NA	NA	NA	NA	NA	NA	NA	NA	NA	NA	NA	NA
245	1	1	69	America	NA	NA	3/10/2020	NA	NA	NA	NA	NA	3/10/2020	NA	NA	NA	NA	NA	NA	NA	NA	NA	NA	NA	NA	NA	NA	NA	NA	NA	NA	NA	NA	NA	NA	NA	NA	NA	NA	NA	NA	NA	NA	NA	NA	NA	NA	NA	NA
246	1	0	82	America	NA	NA	3/10/2020	NA	NA	NA	NA	NA	3/10/2020	NA	NA	NA	NA	NA	NA	NA	NA	NA	NA	NA	NA	NA	NA	NA	NA	NA	NA	NA	NA	NA	NA	NA	NA	NA	NA	NA	NA	NA	NA	NA	NA	NA	NA	NA	NA
247	1	1	67	America	NA	NA	3/12/2020	NA	NA	NA	NA	NA	3/12/2020	NA	NA	NA	NA	NA	NA	NA	NA	NA	NA	NA	NA	NA	NA	NA	NA	NA	NA	NA	NA	NA	NA	NA	NA	NA	NA	NA	NA	NA	NA	NA	NA	NA	NA	NA	NA
248	1	0	55	America	NA	NA	3/13/2020	NA	NA	NA	NA	NA	3/13/2020	NA	NA	NA	NA	NA	NA	NA	NA	NA	NA	NA	NA	NA	NA	NA	NA	NA	NA	NA	NA	NA	NA	NA	NA	NA	NA	NA	NA	NA	NA	NA	NA	NA	NA	NA	NA
249	1	1	70	America	NA	NA	3/14/2020	NA	NA	NA	NA	NA	3/14/2020	NA	NA	NA	NA	NA	NA	NA	NA	NA	NA	NA	NA	NA	NA	NA	NA	NA	NA	NA	NA	NA	NA	NA	NA	NA	NA	NA	NA	NA	NA	NA	NA	NA	NA	NA	NA
250	1	1	55	America	NA	NA	3/18/2020	NA	NA	NA	NA	NA	3/18/2020	NA	NA	NA	NA	NA	NA	NA	NA	NA	NA	NA	NA	NA	NA	NA	NA	NA	NA	NA	NA	NA	NA	NA	NA	NA	NA	NA	NA	NA	NA	NA	NA	NA	NA	NA	NA
251	1	0	73	America	NA	NA	3/18/2020	NA	NA	NA	NA	NA	3/18/2020	NA	NA	NA	NA	NA	NA	NA	NA	NA	NA	NA	NA	NA	NA	NA	NA	NA	NA	NA	NA	NA	NA	NA	NA	NA	NA	NA	NA	NA	NA	NA	NA	NA	NA	NA	NA
252	1	1	50	America	NA	NA	3/20/2020	NA	NA	NA	NA	NA	3/20/2020	NA	NA	NA	NA	NA	NA	NA	NA	NA	NA	NA	NA	NA	NA	NA	NA	NA	NA	NA	NA	NA	NA	NA	NA	NA	NA	NA	NA	NA	NA	NA	NA	NA	NA	NA	NA
253	1	1	73	America	NA	NA	3/20/2020	NA	NA	NA	NA	NA	3/20/2020	NA	NA	NA	NA	NA	NA	NA	NA	NA	NA	NA	NA	NA	NA	NA	NA	NA	NA	NA	NA	NA	NA	NA	NA	NA	NA	NA	NA	NA	NA	NA	NA	NA	NA	NA	NA
254	1	0	72	America	NA	NA	3/20/2020	NA	NA	NA	NA	NA	3/20/2020	NA	NA	NA	NA	NA	NA	NA	NA	NA	NA	NA	NA	NA	NA	NA	NA	NA	NA	NA	NA	NA	NA	NA	NA	NA	NA	NA	NA	NA	NA	NA	NA	NA	NA	NA	NA
255	1	1	52	America	NA	NA	3/21/2020	NA	NA	NA	NA	NA	3/21/2020	NA	NA	NA	NA	NA	NA	NA	NA	NA	NA	NA	NA	NA	NA	NA	NA	NA	NA	NA	NA	NA	NA	NA	NA	NA	NA	NA	NA	NA	NA	NA	NA	NA	NA	NA	NA
256	1	1	78	America	NA	NA	3/22/2020	NA	NA	NA	NA	NA	3/22/2020	NA	NA	NA	NA	NA	NA	NA	NA	NA	NA	NA	NA	NA	NA	NA	NA	NA	NA	NA	NA	NA	NA	NA	NA	NA	NA	NA	NA	NA	NA	NA	NA	NA	NA	NA	NA
257	1	1	72	America	NA	NA	3/23/2020	NA	NA	NA	NA	NA	3/23/2020	NA	NA	NA	NA	NA	NA	NA	NA	NA	NA	NA	NA	NA	NA	NA	NA	NA	NA	NA	NA	NA	NA	NA	NA	NA	NA	NA	NA	NA	NA	NA	NA	NA	NA	NA	NA
258	1	1	63	America	NA	NA	3/23/2020	NA	NA	NA	NA	NA	3/23/2020	NA	NA	NA	NA	NA	NA	NA	NA	NA	NA	NA	NA	NA	NA	NA	NA	NA	NA	NA	NA	NA	NA	NA	NA	NA	NA	NA	NA	NA	NA	NA	NA	NA	NA	NA	NA
259	1	0	90	America	NA	NA	3/23/2020	NA	NA	NA	NA	NA	3/23/2020	NA	NA	NA	NA	NA	NA	NA	NA	NA	NA	NA	NA	NA	NA	NA	NA	NA	NA	NA	NA	NA	NA	NA	NA	NA	NA	NA	NA	NA	NA	NA	NA	NA	NA	NA	NA
260	1	0	73	America	NA	NA	3/23/2020	NA	NA	NA	NA	NA	3/23/2020	NA	NA	NA	NA	NA	NA	NA	NA	NA	NA	NA	NA	NA	NA	NA	NA	NA	NA	NA	NA	NA	NA	NA	NA	NA	NA	NA	NA	NA	NA	NA	NA	NA	NA	NA	NA
261	1	0	81	America	NA	NA	3/24/2020	NA	NA	NA	NA	NA	3/24/2020	NA	NA	NA	NA	NA	NA	NA	NA	NA	NA	NA	NA	NA	NA	NA	NA	NA	NA	NA	NA	NA	NA	NA	NA	NA	NA	NA	NA	NA	NA	NA	NA	NA	NA	NA	NA
262	1	0	80	America	NA	NA	3/24/2020	NA	NA	NA	NA	NA	3/24/2020	NA	NA	NA	NA	NA	NA	NA	NA	NA	NA	NA	NA	NA	NA	NA	NA	NA	NA	NA	NA	NA	NA	NA	NA	NA	NA	NA	NA	NA	NA	NA	NA	NA	NA	NA	NA
263	1	0	82	America	NA	NA	3/25/2020	NA	NA	NA	NA	NA	3/25/2020	NA	NA	NA	NA	NA	NA	NA	NA	NA	NA	NA	NA	NA	NA	NA	NA	NA	NA	NA	NA	NA	NA	NA	NA	NA	NA	NA	NA	NA	NA	NA	NA	NA	NA	NA	NA
264	1	0	69	America	NA	NA	3/25/2020	NA	NA	NA	NA	NA	3/25/2020	NA	NA	NA	NA	NA	NA	NA	NA	NA	NA	NA	NA	NA	NA	NA	NA	NA	NA	NA	NA	NA	NA	NA	NA	NA	NA	NA	NA	NA	NA	NA	NA	NA	NA	NA	NA
265	1	1	93	America	NA	NA	3/27/2020	NA	NA	NA	NA	NA	3/27/2020	NA	NA	NA	NA	NA	NA	NA	NA	NA	NA	NA	NA	NA	NA	NA	NA	NA	NA	NA	NA	NA	NA	NA	NA	NA	NA	NA	NA	NA	NA	NA	NA	NA	NA	NA	NA
266	1	0	90	America	NA	NA	3/29/2020	NA	NA	NA	NA	NA	3/29/2020	NA	NA	NA	NA	NA	NA	NA	NA	NA	NA	NA	NA	NA	NA	NA	NA	NA	NA	NA	NA	NA	NA	NA	NA	NA	NA	NA	NA	NA	NA	NA	NA	NA	NA	NA	NA
267	1	1	91	America	NA	NA	3/29/2020	NA	NA	NA	NA	NA	3/29/2020	NA	NA	NA	NA	NA	NA	NA	NA	NA	NA	NA	NA	NA	NA	NA	NA	NA	NA	NA	NA	NA	NA	NA	NA	NA	NA	NA	NA	NA	NA	NA	NA	NA	NA	NA	NA
268	1	1	91	America	NA	NA	3/29/2020	NA	NA	NA	NA	NA	3/29/2020	NA	NA	NA	NA	NA	NA	NA	NA	NA	NA	NA	NA	NA	NA	NA	NA	NA	NA	NA	NA	NA	NA	NA	NA	NA	NA	NA	NA	NA	NA	NA	NA	NA	NA	NA	NA
269	1	1	80	America	NA	NA	3/29/2020	NA	NA	NA	NA	NA	3/29/2020	NA	NA	NA	NA	NA	NA	NA	NA	NA	NA	NA	NA	NA	NA	NA	NA	NA	NA	NA	NA	NA	NA	NA	NA	NA	NA	NA	NA	NA	NA	NA	NA	NA	NA	NA	NA
270	1	0	88	America	NA	NA	3/30/2020	NA	NA	NA	NA	NA	3/30/2020	NA	NA	NA	NA	NA	NA	NA	NA	NA	NA	NA	NA	NA	NA	NA	NA	NA	NA	NA	NA	NA	NA	NA	NA	NA	NA	NA	NA	NA	NA	NA	NA	NA	NA	NA	NA
271	1	1	88	Andorra	NA	NA	3/22/2020	NA	NA	NA	NA	NA	3/22/2020	NA	NA	NA	NA	NA	NA	NA	NA	NA	NA	NA	NA	NA	NA	NA	NA	NA	NA	NA	NA	NA	NA	NA	NA	NA	NA	NA	NA	NA	NA	NA	NA	NA	NA	NA	NA
272	1	1	69	Austria	NA	NA	3/12/2020	NA	NA	NA	NA	NA	3/12/2020	NA	NA	NA	NA	NA	NA	NA	NA	NA	NA	NA	NA	NA	NA	NA	NA	NA	NA	NA	NA	NA	NA	NA	NA	NA	NA	NA	NA	NA	NA	NA	NA	NA	NA	NA	NA
273	1	0	90	Belgium	NA	NA	3/11/2020	NA	NA	NA	NA	NA	3/11/2020	NA	NA	NA	NA	NA	NA	NA	NA	NA	NA	NA	NA	NA	NA	NA	NA	NA	NA	NA	NA	NA	NA	NA	NA	NA	NA	NA	NA	NA	NA	NA	NA	NA	NA	NA	NA
274	1	1	73	Belgium	NA	NA	3/11/2020	NA	NA	NA	NA	NA	3/11/2020	NA	NA	NA	NA	NA	NA	NA	NA	NA	NA	NA	NA	NA	NA	NA	NA	NA	NA	NA	NA	NA	NA	NA	NA	NA	NA	NA	NA	NA	NA	NA	NA	NA	NA	NA	NA
275	1	1	86	Belgium	NA	NA	3/11/2020	NA	NA	NA	NA	NA	3/11/2020	NA	NA	NA	NA	NA	NA	NA	NA	NA	NA	NA	NA	NA	NA	NA	NA	NA	NA	NA	NA	NA	NA	NA	NA	NA	NA	NA	NA	NA	NA	NA	NA	NA	NA	NA	NA
276	1	0	12	Belgium	NA	NA	3/31/2020	NA	NA	NA	NA	NA	3/31/2020	NA	NA	NA	NA	NA	NA	NA	NA	NA	NA	NA	NA	NA	NA	NA	NA	NA	NA	NA	NA	NA	NA	NA	NA	NA	NA	NA	NA	NA	NA	NA	NA	NA	NA	NA	NA
277	1	0	52	Bosnia and Herzegovina	NA	NA	3/24/2020	NA	NA	NA	NA	NA	3/24/2020	NA	NA	NA	NA	NA	NA	NA	NA	NA	NA	NA	NA	NA	NA	NA	NA	NA	NA	NA	NA	NA	NA	NA	NA	NA	NA	NA	NA	NA	NA	NA	NA	NA	NA	NA	NA
278	1	1	53	Bosnia and Herzegovina	NA	NA	3/24/2020	NA	NA	NA	NA	NA	3/24/2020	NA	NA	NA	NA	NA	NA	NA	NA	NA	NA	NA	NA	NA	NA	NA	NA	NA	NA	NA	NA	NA	NA	NA	NA	NA	NA	NA	NA	NA	NA	NA	NA	NA	NA	NA	NA
279	1	0	66	Bulgaria	NA	NA	3/11/2020	NA	NA	NA	NA	NA	3/11/2020	NA	NA	NA	NA	NA	NA	NA	NA	NA	NA	NA	NA	NA	NA	NA	NA	NA	NA	NA	NA	NA	NA	NA	NA	NA	NA	NA	NA	NA	NA	NA	NA	NA	NA	NA	NA
280	1	1	74	Bulgaria	NA	NA	3/14/2020	NA	NA	NA	NA	NA	3/14/2020	NA	NA	NA	NA	NA	NA	NA	NA	NA	NA	NA	NA	NA	NA	NA	NA	NA	NA	NA	NA	NA	NA	NA	NA	NA	NA	NA	NA	NA	NA	NA	NA	NA	NA	NA	NA
281	1	0	80	Bulgaria	NA	NA	3/19/2020	NA	NA	NA	NA	NA	3/19/2020	NA	NA	NA	NA	NA	NA	NA	NA	NA	NA	NA	NA	NA	NA	NA	NA	NA	NA	NA	NA	NA	NA	NA	NA	NA	NA	NA	NA	NA	NA	NA	NA	NA	NA	NA	NA
282	1	0	78	Bulgaria	NA	NA	3/19/2020	NA	NA	NA	NA	NA	3/19/2020	NA	NA	NA	NA	NA	NA	NA	NA	NA	NA	NA	NA	NA	NA	NA	NA	NA	NA	NA	NA	NA	NA	NA	NA	NA	NA	NA	NA	NA	NA	NA	NA	NA	NA	NA	NA
283	1	0	74	Bulgaria	NA	NA	3/28/2020	NA	NA	NA	NA	NA	3/28/2020	NA	NA	NA	NA	NA	NA	NA	NA	NA	NA	NA	NA	NA	NA	NA	NA	NA	NA	NA	NA	NA	NA	NA	NA	NA	NA	NA	NA	NA	NA	NA	NA	NA	NA	NA	NA
284	1	0	51	Bulgaria	NA	NA	3/29/2020	NA	NA	NA	NA	NA	3/29/2020	NA	NA	NA	NA	NA	NA	NA	NA	NA	NA	NA	NA	NA	NA	NA	NA	NA	NA	NA	NA	NA	NA	NA	NA	NA	NA	NA	NA	NA	NA	NA	NA	NA	NA	NA	NA
285	1	1	77	Canada	NA	NA	3/17/2020	NA	NA	NA	NA	NA	3/17/2020	NA	NA	NA	NA	NA	NA	NA	NA	NA	NA	NA	NA	NA	NA	NA	NA	NA	NA	NA	NA	NA	NA	NA	NA	NA	NA	NA	NA	NA	NA	NA	NA	NA	NA	NA	NA
286	1	1	50	Canada	NA	NA	3/19/2020	NA	NA	NA	NA	NA	3/19/2020	NA	NA	NA	NA	NA	NA	NA	NA	NA	NA	NA	NA	NA	NA	NA	NA	NA	NA	NA	NA	NA	NA	NA	NA	NA	NA	NA	NA	NA	NA	NA	NA	NA	NA	NA	NA
287	1	1	87	Costa Rica	NA	NA	3/18/2020	NA	NA	NA	NA	NA	3/18/2020	NA	NA	NA	NA	NA	NA	NA	NA	NA	NA	NA	NA	NA	NA	NA	NA	NA	NA	NA	NA	NA	NA	NA	NA	NA	NA	NA	NA	NA	NA	NA	NA	NA	NA	NA	NA
288	1	1	87	Costa Rica	NA	NA	3/19/2020	NA	NA	NA	NA	NA	3/19/2020	NA	NA	NA	NA	NA	NA	NA	NA	NA	NA	NA	NA	NA	NA	NA	NA	NA	NA	NA	NA	NA	NA	NA	NA	NA	NA	NA	NA	NA	NA	NA	NA	NA	NA	NA	NA
289	1	1	70	Croatia	NA	NA	3/18/2020	NA	NA	NA	NA	NA	3/18/2020	NA	NA	NA	NA	NA	NA	NA	NA	NA	NA	NA	NA	NA	NA	NA	NA	NA	NA	NA	NA	NA	NA	NA	NA	NA	NA	NA	NA	NA	NA	NA	NA	NA	NA	NA	NA
290	1	1	74	Croatia	NA	NA	3/26/2020	NA	NA	NA	NA	NA	3/26/2020	NA	NA	NA	NA	NA	NA	NA	NA	NA	NA	NA	NA	NA	NA	NA	NA	NA	NA	NA	NA	NA	NA	NA	NA	NA	NA	NA	NA	NA	NA	NA	NA	NA	NA	NA	NA
291	1	0	65	Croatia	NA	NA	3/26/2020	NA	NA	NA	NA	NA	3/26/2020	NA	NA	NA	NA	NA	NA	NA	NA	NA	NA	NA	NA	NA	NA	NA	NA	NA	NA	NA	NA	NA	NA	NA	NA	NA	NA	NA	NA	NA	NA	NA	NA	NA	NA	NA	NA
292	1	0	92	Croatia	NA	NA	3/27/2020	NA	NA	NA	NA	NA	3/27/2020	NA	NA	NA	NA	NA	NA	NA	NA	NA	NA	NA	NA	NA	NA	NA	NA	NA	NA	NA	NA	NA	NA	NA	NA	NA	NA	NA	NA	NA	NA	NA	NA	NA	NA	NA	NA
293	1	1	60	Croatia	NA	NA	3/27/2020	NA	NA	NA	NA	NA	3/27/2020	NA	NA	NA	NA	NA	NA	NA	NA	NA	NA	NA	NA	NA	NA	NA	NA	NA	NA	NA	NA	NA	NA	NA	NA	NA	NA	NA	NA	NA	NA	NA	NA	NA	NA	NA	NA
294	1	1	84	Croatia	NA	NA	3/29/2020	NA	NA	NA	NA	NA	3/29/2020	NA	NA	NA	NA	NA	NA	NA	NA	NA	NA	NA	NA	NA	NA	NA	NA	NA	NA	NA	NA	NA	NA	NA	NA	NA	NA	NA	NA	NA	NA	NA	NA	NA	NA	NA	NA
295	1	1	61	Cuba	NA	NA	3/18/2020	NA	NA	NA	NA	NA	3/18/2020	NA	NA	NA	NA	NA	NA	NA	NA	NA	NA	NA	NA	NA	NA	NA	NA	NA	NA	NA	NA	NA	NA	NA	NA	NA	NA	NA	NA	NA	NA	NA	NA	NA	NA	NA	NA
296	1	1	45	Cuba	NA	NA	3/26/2020	NA	NA	NA	NA	NA	3/26/2020	NA	NA	NA	NA	NA	NA	NA	NA	NA	NA	NA	NA	NA	NA	NA	NA	NA	NA	NA	NA	NA	NA	NA	NA	NA	NA	NA	NA	NA	NA	NA	NA	NA	NA	NA	NA
297	1	1	63	Cuba	NA	NA	3/28/2020	NA	NA	NA	NA	NA	3/28/2020	NA	NA	NA	NA	NA	NA	NA	NA	NA	NA	NA	NA	NA	NA	NA	NA	NA	NA	NA	NA	NA	NA	NA	NA	NA	NA	NA	NA	NA	NA	NA	NA	NA	NA	NA	NA
298	1	1	52	Cuba	NA	NA	3/28/2020	NA	NA	NA	NA	NA	3/28/2020	NA	NA	NA	NA	NA	NA	NA	NA	NA	NA	NA	NA	NA	NA	NA	NA	NA	NA	NA	NA	NA	NA	NA	NA	NA	NA	NA	NA	NA	NA	NA	NA	NA	NA	NA	NA
299	1	1	63	Cuba	NA	NA	3/31/2020	NA	NA	NA	NA	NA	3/31/2020	NA	NA	NA	NA	NA	NA	NA	NA	NA	NA	NA	NA	NA	NA	NA	NA	NA	NA	NA	NA	NA	NA	NA	NA	NA	NA	NA	NA	NA	NA	NA	NA	NA	NA	NA	NA
300	1	1	75	Cuba	NA	NA	3/31/2020	NA	NA	NA	NA	NA	3/31/2020	NA	NA	NA	NA	NA	NA	NA	NA	NA	NA	NA	NA	NA	NA	NA	NA	NA	NA	NA	NA	NA	NA	NA	NA	NA	NA	NA	NA	NA	NA	NA	NA	NA	NA	NA	NA
301	1	0	76	Cyprus	NA	NA	3/27/2020	NA	NA	NA	NA	NA	3/27/2020	NA	NA	NA	NA	NA	NA	NA	NA	NA	NA	NA	NA	NA	NA	NA	NA	NA	NA	NA	NA	NA	NA	NA	NA	NA	NA	NA	NA	NA	NA	NA	NA	NA	NA	NA	NA
302	1	1	47	Cyprus	NA	NA	3/27/2020	NA	NA	NA	NA	NA	3/27/2020	NA	NA	NA	NA	NA	NA	NA	NA	NA	NA	NA	NA	NA	NA	NA	NA	NA	NA	NA	NA	NA	NA	NA	NA	NA	NA	NA	NA	NA	NA	NA	NA	NA	NA	NA	NA
303	1	1	95	Czechia	NA	NA	3/22/2020	NA	NA	NA	NA	NA	3/22/2020	NA	NA	NA	NA	NA	NA	NA	NA	NA	NA	NA	NA	NA	NA	NA	NA	NA	NA	NA	NA	NA	NA	NA	NA	NA	NA	NA	NA	NA	NA	NA	NA	NA	NA	NA	NA
304	1	1	45	Czechia	NA	NA	3/24/2020	NA	NA	NA	NA	NA	3/24/2020	NA	NA	NA	NA	NA	NA	NA	NA	NA	NA	NA	NA	NA	NA	NA	NA	NA	NA	NA	NA	NA	NA	NA	NA	NA	NA	NA	NA	NA	NA	NA	NA	NA	NA	NA	NA
305	1	0	71	Czechia	NA	NA	3/24/2020	NA	NA	NA	NA	NA	3/24/2020	NA	NA	NA	NA	NA	NA	NA	NA	NA	NA	NA	NA	NA	NA	NA	NA	NA	NA	NA	NA	NA	NA	NA	NA	NA	NA	NA	NA	NA	NA	NA	NA	NA	NA	NA	NA
306	1	1	88	Czechia	NA	NA	3/25/2020	NA	NA	NA	NA	NA	3/25/2020	NA	NA	NA	NA	NA	NA	NA	NA	NA	NA	NA	NA	NA	NA	NA	NA	NA	NA	NA	NA	NA	NA	NA	NA	NA	NA	NA	NA	NA	NA	NA	NA	NA	NA	NA	NA
307	1	1	80	Denmark	NA	NA	3/12/2020	NA	NA	NA	NA	NA	3/12/2020	NA	NA	NA	NA	NA	NA	NA	NA	NA	NA	NA	NA	NA	NA	NA	NA	NA	NA	NA	NA	NA	NA	NA	NA	NA	NA	NA	NA	NA	NA	NA	NA	NA	NA	NA	NA
308	1	1	81	Denmark	NA	NA	3/14/2020	NA	NA	NA	NA	NA	3/14/2020	NA	NA	NA	NA	NA	NA	NA	NA	NA	NA	NA	NA	NA	NA	NA	NA	NA	NA	NA	NA	NA	NA	NA	NA	NA	NA	NA	NA	NA	NA	NA	NA	NA	NA	NA	NA
309	1	0	47	Dominican Republic	NA	NA	3/16/2020	NA	NA	NA	NA	NA	3/16/2020	NA	NA	NA	NA	NA	NA	NA	NA	NA	NA	NA	NA	NA	NA	NA	NA	NA	NA	NA	NA	NA	NA	NA	NA	NA	NA	NA	NA	NA	NA	NA	NA	NA	NA	NA	NA
310	1	1	88	Dominican Republic	NA	NA	3/20/2020	NA	NA	NA	NA	NA	3/20/2020	NA	NA	NA	NA	NA	NA	NA	NA	NA	NA	NA	NA	NA	NA	NA	NA	NA	NA	NA	NA	NA	NA	NA	NA	NA	NA	NA	NA	NA	NA	NA	NA	NA	NA	NA	NA
311	1	0	82	Dominican Republic	NA	NA	3/21/2020	NA	NA	NA	NA	NA	3/21/2020	NA	NA	NA	NA	NA	NA	NA	NA	NA	NA	NA	NA	NA	NA	NA	NA	NA	NA	NA	NA	NA	NA	NA	NA	NA	NA	NA	NA	NA	NA	NA	NA	NA	NA	NA	NA
312	1	0	62	Dominican Republic	NA	NA	3/24/2020	NA	NA	NA	NA	NA	3/24/2020	NA	NA	NA	NA	NA	NA	NA	NA	NA	NA	NA	NA	NA	NA	NA	NA	NA	NA	NA	NA	NA	NA	NA	NA	NA	NA	NA	NA	NA	NA	NA	NA	NA	NA	NA	NA
313	1	0	83	Estonia	NA	NA	3/25/2020	NA	NA	NA	NA	NA	3/25/2020	NA	NA	NA	NA	NA	NA	NA	NA	NA	NA	NA	NA	NA	NA	NA	NA	NA	NA	NA	NA	NA	NA	NA	NA	NA	NA	NA	NA	NA	NA	NA	NA	NA	NA	NA	NA
314	1	1	90	Estonia	NA	NA	3/29/2020	NA	NA	NA	NA	NA	3/29/2020	NA	NA	NA	NA	NA	NA	NA	NA	NA	NA	NA	NA	NA	NA	NA	NA	NA	NA	NA	NA	NA	NA	NA	NA	NA	NA	NA	NA	NA	NA	NA	NA	NA	NA	NA	NA
315	1	1	90	Estonia	NA	NA	3/30/2020	NA	NA	NA	NA	NA	3/30/2020	NA	NA	NA	NA	NA	NA	NA	NA	NA	NA	NA	NA	NA	NA	NA	NA	NA	NA	NA	NA	NA	NA	NA	NA	NA	NA	NA	NA	NA	NA	NA	NA	NA	NA	NA	NA
316	1	1	80	France	NA	NA	2/14/2020	NA	NA	NA	NA	NA	2/14/2020	NA	NA	NA	NA	NA	NA	NA	NA	NA	NA	NA	NA	NA	NA	NA	NA	NA	NA	NA	NA	NA	NA	NA	NA	NA	NA	NA	NA	NA	NA	NA	NA	NA	NA	NA	NA
317	1	1	60	France	NA	NA	2/26/2020	NA	NA	NA	NA	NA	2/26/2020	NA	NA	NA	NA	NA	NA	NA	NA	NA	NA	NA	NA	NA	NA	NA	NA	NA	NA	NA	NA	NA	NA	NA	NA	NA	NA	NA	NA	NA	NA	NA	NA	NA	NA	NA	NA
318	1	1	92	France	NA	NA	3/2/2020	NA	NA	NA	NA	NA	3/2/2020	NA	NA	NA	NA	NA	NA	NA	NA	NA	NA	NA	NA	NA	NA	NA	NA	NA	NA	NA	NA	NA	NA	NA	NA	NA	NA	NA	NA	NA	NA	NA	NA	NA	NA	NA	NA
319	1	0	89	France	NA	NA	3/2/2020	NA	NA	NA	NA	NA	3/2/2020	NA	NA	NA	NA	NA	NA	NA	NA	NA	NA	NA	NA	NA	NA	NA	NA	NA	NA	NA	NA	NA	NA	NA	NA	NA	NA	NA	NA	NA	NA	NA	NA	NA	NA	NA	NA
320	1	0	86	France	NA	NA	3/15/2020	NA	NA	NA	NA	NA	3/15/2020	NA	NA	NA	NA	NA	NA	NA	NA	NA	NA	NA	NA	NA	NA	NA	NA	NA	NA	NA	NA	NA	NA	NA	NA	NA	NA	NA	NA	NA	NA	NA	NA	NA	NA	NA	NA
321	1	0	89	Germany	NA	NA	3/9/2020	NA	NA	NA	NA	NA	3/9/2020	NA	NA	NA	NA	NA	NA	NA	NA	NA	NA	NA	NA	NA	NA	NA	NA	NA	NA	NA	NA	NA	NA	NA	NA	NA	NA	NA	NA	NA	NA	NA	NA	NA	NA	NA	NA
322	1	1	78	Germany	NA	NA	3/9/2020	NA	NA	NA	NA	NA	3/9/2020	NA	NA	NA	NA	NA	NA	NA	NA	NA	NA	NA	NA	NA	NA	NA	NA	NA	NA	NA	NA	NA	NA	NA	NA	NA	NA	NA	NA	NA	NA	NA	NA	NA	NA	NA	NA
323	1	1	73	Germany	NA	NA	3/11/2020	NA	NA	NA	NA	NA	3/11/2020	NA	NA	NA	NA	NA	NA	NA	NA	NA	NA	NA	NA	NA	NA	NA	NA	NA	NA	NA	NA	NA	NA	NA	NA	NA	NA	NA	NA	NA	NA	NA	NA	NA	NA	NA	NA
324	1	1	83	Germany	NA	NA	3/12/2020	NA	NA	NA	NA	NA	3/12/2020	NA	NA	NA	NA	NA	NA	NA	NA	NA	NA	NA	NA	NA	NA	NA	NA	NA	NA	NA	NA	NA	NA	NA	NA	NA	NA	NA	NA	NA	NA	NA	NA	NA	NA	NA	NA
325	1	1	42	Germany	NA	NA	3/23/2020	NA	NA	NA	NA	NA	3/23/2020	NA	NA	NA	NA	NA	NA	NA	NA	NA	NA	NA	NA	NA	NA	NA	NA	NA	NA	NA	NA	NA	NA	NA	NA	NA	NA	NA	NA	NA	NA	NA	NA	NA	NA	NA	NA
326	1	1	66	Greece	NA	NA	3/12/2020	NA	NA	NA	NA	NA	3/12/2020	NA	NA	NA	NA	NA	NA	NA	NA	NA	NA	NA	NA	NA	NA	NA	NA	NA	NA	NA	NA	NA	NA	NA	NA	NA	NA	NA	NA	NA	NA	NA	NA	NA	NA	NA	NA
327	1	1	90	Greece	NA	NA	3/14/2020	NA	NA	NA	NA	NA	3/14/2020	NA	NA	NA	NA	NA	NA	NA	NA	NA	NA	NA	NA	NA	NA	NA	NA	NA	NA	NA	NA	NA	NA	NA	NA	NA	NA	NA	NA	NA	NA	NA	NA	NA	NA	NA	NA
328	1	1	67	Greece	NA	NA	3/14/2020	NA	NA	NA	NA	NA	3/14/2020	NA	NA	NA	NA	NA	NA	NA	NA	NA	NA	NA	NA	NA	NA	NA	NA	NA	NA	NA	NA	NA	NA	NA	NA	NA	NA	NA	NA	NA	NA	NA	NA	NA	NA	NA	NA
329	1	1	53	Greece	NA	NA	3/15/2020	NA	NA	NA	NA	NA	3/15/2020	NA	NA	NA	NA	NA	NA	NA	NA	NA	NA	NA	NA	NA	NA	NA	NA	NA	NA	NA	NA	NA	NA	NA	NA	NA	NA	NA	NA	NA	NA	NA	NA	NA	NA	NA	NA
330	1	1	67	Greece	NA	NA	3/17/2020	NA	NA	NA	NA	NA	3/17/2020	NA	NA	NA	NA	NA	NA	NA	NA	NA	NA	NA	NA	NA	NA	NA	NA	NA	NA	NA	NA	NA	NA	NA	NA	NA	NA	NA	NA	NA	NA	NA	NA	NA	NA	NA	NA
331	1	1	70	Greece	NA	NA	3/19/2020	NA	NA	NA	NA	NA	3/19/2020	NA	NA	NA	NA	NA	NA	NA	NA	NA	NA	NA	NA	NA	NA	NA	NA	NA	NA	NA	NA	NA	NA	NA	NA	NA	NA	NA	NA	NA	NA	NA	NA	NA	NA	NA	NA
332	1	0	40	Greece	NA	NA	3/21/2020	NA	NA	NA	NA	NA	3/21/2020	NA	NA	NA	NA	NA	NA	NA	NA	NA	NA	NA	NA	NA	NA	NA	NA	NA	NA	NA	NA	NA	NA	NA	NA	NA	NA	NA	NA	NA	NA	NA	NA	NA	NA	NA	NA
333	1	1	64	Greece	NA	NA	3/23/2020	NA	NA	NA	NA	NA	3/23/2020	NA	NA	NA	NA	NA	NA	NA	NA	NA	NA	NA	NA	NA	NA	NA	NA	NA	NA	NA	NA	NA	NA	NA	NA	NA	NA	NA	NA	NA	NA	NA	NA	NA	NA	NA	NA
334	1	1	85	Guatemala	NA	NA	3/15/2020	NA	NA	NA	NA	NA	3/15/2020	NA	NA	NA	NA	NA	NA	NA	NA	NA	NA	NA	NA	NA	NA	NA	NA	NA	NA	NA	NA	NA	NA	NA	NA	NA	NA	NA	NA	NA	NA	NA	NA	NA	NA	NA	NA
335	1	1	60	Honduras	NA	NA	3/25/2020	NA	NA	NA	NA	NA	3/25/2020	NA	NA	NA	NA	NA	NA	NA	NA	NA	NA	NA	NA	NA	NA	NA	NA	NA	NA	NA	NA	NA	NA	NA	NA	NA	NA	NA	NA	NA	NA	NA	NA	NA	NA	NA	NA
336	1	0	49	Honduras	NA	NA	3/28/2020	NA	NA	NA	NA	NA	3/28/2020	NA	NA	NA	NA	NA	NA	NA	NA	NA	NA	NA	NA	NA	NA	NA	NA	NA	NA	NA	NA	NA	NA	NA	NA	NA	NA	NA	NA	NA	NA	NA	NA	NA	NA	NA	NA
337	1	1	77	Honduras	NA	NA	3/31/2020	NA	NA	NA	NA	NA	3/31/2020	NA	NA	NA	NA	NA	NA	NA	NA	NA	NA	NA	NA	NA	NA	NA	NA	NA	NA	NA	NA	NA	NA	NA	NA	NA	NA	NA	NA	NA	NA	NA	NA	NA	NA	NA	NA
338	1	0	53	Honduras	NA	NA	3/31/2020	NA	NA	NA	NA	NA	3/31/2020	NA	NA	NA	NA	NA	NA	NA	NA	NA	NA	NA	NA	NA	NA	NA	NA	NA	NA	NA	NA	NA	NA	NA	NA	NA	NA	NA	NA	NA	NA	NA	NA	NA	NA	NA	NA
339	1	1	75	Hungary	NA	NA	3/15/2020	NA	NA	NA	NA	NA	3/15/2020	NA	NA	NA	NA	NA	NA	NA	NA	NA	NA	NA	NA	NA	NA	NA	NA	NA	NA	NA	NA	NA	NA	NA	NA	NA	NA	NA	NA	NA	NA	NA	NA	NA	NA	NA	NA
340	1	1	53	Hungary	NA	NA	3/20/2020	NA	NA	NA	NA	NA	3/20/2020	NA	NA	NA	NA	NA	NA	NA	NA	NA	NA	NA	NA	NA	NA	NA	NA	NA	NA	NA	NA	NA	NA	NA	NA	NA	NA	NA	NA	NA	NA	NA	NA	NA	NA	NA	NA
341	1	1	79	Hungary	NA	NA	3/20/2020	NA	NA	NA	NA	NA	3/20/2020	NA	NA	NA	NA	NA	NA	NA	NA	NA	NA	NA	NA	NA	NA	NA	NA	NA	NA	NA	NA	NA	NA	NA	NA	NA	NA	NA	NA	NA	NA	NA	NA	NA	NA	NA	NA
342	1	1	68	Hungary	NA	NA	3/20/2020	NA	NA	NA	NA	NA	3/20/2020	NA	NA	NA	NA	NA	NA	NA	NA	NA	NA	NA	NA	NA	NA	NA	NA	NA	NA	NA	NA	NA	NA	NA	NA	NA	NA	NA	NA	NA	NA	NA	NA	NA	NA	NA	NA
343	1	0	59	Hungary	NA	NA	3/31/2020	NA	NA	NA	NA	NA	3/31/2020	NA	NA	NA	NA	NA	NA	NA	NA	NA	NA	NA	NA	NA	NA	NA	NA	NA	NA	NA	NA	NA	NA	NA	NA	NA	NA	NA	NA	NA	NA	NA	NA	NA	NA	NA	NA
344	1	0	76	Hungary	NA	NA	NA	NA	NA	NA	NA	NA	before 2020/3/31	NA	NA	NA	NA	NA	NA	NA	NA	NA	NA	NA	NA	NA	NA	NA	NA	NA	NA	NA	NA	NA	NA	NA	NA	NA	NA	NA	NA	NA	NA	NA	NA	NA	NA	NA	NA
345	1	1	74	Hungary	NA	NA	NA	NA	NA	NA	NA	NA	before 2020/3/31	NA	NA	NA	NA	NA	NA	NA	NA	NA	NA	NA	NA	NA	NA	NA	NA	NA	NA	NA	NA	NA	NA	NA	NA	NA	NA	NA	NA	NA	NA	NA	NA	NA	NA	NA	NA
346	1	1	68	Hungary	NA	NA	NA	NA	NA	NA	NA	NA	before 2020/3/31	NA	NA	NA	NA	NA	NA	NA	NA	NA	NA	NA	NA	NA	NA	NA	NA	NA	NA	NA	NA	NA	NA	NA	NA	NA	NA	NA	NA	NA	NA	NA	NA	NA	NA	NA	NA
347	1	1	38	Hungary	NA	NA	NA	NA	NA	NA	NA	NA	before 2020/3/31	NA	NA	NA	NA	NA	NA	NA	NA	NA	NA	NA	NA	NA	NA	NA	NA	NA	NA	NA	NA	NA	NA	NA	NA	NA	NA	NA	NA	NA	NA	NA	NA	NA	NA	NA	NA
348	1	0	90	Hungary	NA	NA	NA	NA	NA	NA	NA	NA	before 2020/3/31	NA	NA	NA	NA	NA	NA	NA	NA	NA	NA	NA	NA	NA	NA	NA	NA	NA	NA	NA	NA	NA	NA	NA	NA	NA	NA	NA	NA	NA	NA	NA	NA	NA	NA	NA	NA
349	1	1	80	Hungary	NA	NA	NA	NA	NA	NA	NA	NA	before 2020/3/31	NA	NA	NA	NA	NA	NA	NA	NA	NA	NA	NA	NA	NA	NA	NA	NA	NA	NA	NA	NA	NA	NA	NA	NA	NA	NA	NA	NA	NA	NA	NA	NA	NA	NA	NA	NA
350	1	1	73	Hungary	NA	NA	NA	NA	NA	NA	NA	NA	before 2020/3/31	NA	NA	NA	NA	NA	NA	NA	NA	NA	NA	NA	NA	NA	NA	NA	NA	NA	NA	NA	NA	NA	NA	NA	NA	NA	NA	NA	NA	NA	NA	NA	NA	NA	NA	NA	NA
351	1	0	86	Hungary	NA	NA	NA	NA	NA	NA	NA	NA	before 2020/3/31	NA	NA	NA	NA	NA	NA	NA	NA	NA	NA	NA	NA	NA	NA	NA	NA	NA	NA	NA	NA	NA	NA	NA	NA	NA	NA	NA	NA	NA	NA	NA	NA	NA	NA	NA	NA
352	1	1	92	Hungary	NA	NA	NA	NA	NA	NA	NA	NA	before 2020/3/31	NA	NA	NA	NA	NA	NA	NA	NA	NA	NA	NA	NA	NA	NA	NA	NA	NA	NA	NA	NA	NA	NA	NA	NA	NA	NA	NA	NA	NA	NA	NA	NA	NA	NA	NA	NA
353	1	1	94	Hungary	NA	NA	NA	NA	NA	NA	NA	NA	before 2020/3/31	NA	NA	NA	NA	NA	NA	NA	NA	NA	NA	NA	NA	NA	NA	NA	NA	NA	NA	NA	NA	NA	NA	NA	NA	NA	NA	NA	NA	NA	NA	NA	NA	NA	NA	NA	NA
354	1	1	36	Iceland	NA	NA	3/17/2020	NA	NA	NA	NA	NA	3/17/2020	NA	NA	NA	NA	NA	NA	NA	NA	NA	NA	NA	NA	NA	NA	NA	NA	NA	NA	NA	NA	NA	NA	NA	NA	NA	NA	NA	NA	NA	NA	NA	NA	NA	NA	NA	NA
355	1	0	70	Iceland	NA	NA	3/22/2020	NA	NA	NA	NA	NA	3/22/2020	NA	NA	NA	NA	NA	NA	NA	NA	NA	NA	NA	NA	NA	NA	NA	NA	NA	NA	NA	NA	NA	NA	NA	NA	NA	NA	NA	NA	NA	NA	NA	NA	NA	NA	NA	NA
356	1	1	59	Ireland	NA	NA	3/28/2020	NA	NA	NA	NA	NA	3/28/2020	NA	NA	NA	NA	NA	NA	NA	NA	NA	NA	NA	NA	NA	NA	NA	NA	NA	NA	NA	NA	NA	NA	NA	NA	NA	NA	NA	NA	NA	NA	NA	NA	NA	NA	NA	NA
357	1	1	82	Ireland	NA	NA	3/29/2020	NA	NA	NA	NA	NA	3/29/2020	NA	NA	NA	NA	NA	NA	NA	NA	NA	NA	NA	NA	NA	NA	NA	NA	NA	NA	NA	NA	NA	NA	NA	NA	NA	NA	NA	NA	NA	NA	NA	NA	NA	NA	NA	NA
358	1	1	99	Ireland	NA	NA	3/29/2020	NA	NA	NA	NA	NA	3/29/2020	NA	NA	NA	NA	NA	NA	NA	NA	NA	NA	NA	NA	NA	NA	NA	NA	NA	NA	NA	NA	NA	NA	NA	NA	NA	NA	NA	NA	NA	NA	NA	NA	NA	NA	NA	NA
359	1	1	87	Ireland	NA	NA	3/29/2020	NA	NA	NA	NA	NA	3/29/2020	NA	NA	NA	NA	NA	NA	NA	NA	NA	NA	NA	NA	NA	NA	NA	NA	NA	NA	NA	NA	NA	NA	NA	NA	NA	NA	NA	NA	NA	NA	NA	NA	NA	NA	NA	NA
360	1	0	83	Ireland	NA	NA	3/30/2020	NA	NA	NA	NA	NA	3/30/2020	NA	NA	NA	NA	NA	NA	NA	NA	NA	NA	NA	NA	NA	NA	NA	NA	NA	NA	NA	NA	NA	NA	NA	NA	NA	NA	NA	NA	NA	NA	NA	NA	NA	NA	NA	NA
361	1	1	79	Ireland	NA	NA	3/31/2020	NA	NA	NA	NA	NA	3/31/2020	NA	NA	NA	NA	NA	NA	NA	NA	NA	NA	NA	NA	NA	NA	NA	NA	NA	NA	NA	NA	NA	NA	NA	NA	NA	NA	NA	NA	NA	NA	NA	NA	NA	NA	NA	NA
362	1	0	83	Ireland	NA	NA	3/31/2020	NA	NA	NA	NA	NA	3/31/2020	NA	NA	NA	NA	NA	NA	NA	NA	NA	NA	NA	NA	NA	NA	NA	NA	NA	NA	NA	NA	NA	NA	NA	NA	NA	NA	NA	NA	NA	NA	NA	NA	NA	NA	NA	NA
363	1	1	32	Ireland	NA	NA	NA	NA	NA	NA	NA	NA	before 2020/4/30	NA	NA	NA	NA	NA	NA	NA	NA	NA	NA	NA	NA	NA	NA	NA	NA	NA	NA	NA	NA	NA	NA	NA	NA	NA	NA	NA	NA	NA	NA	NA	NA	NA	NA	NA	NA
364	1	0	77	Italy	NA	NA	2/21/2020	NA	NA	NA	NA	NA	2/21/2020	NA	NA	NA	NA	NA	NA	NA	NA	NA	NA	NA	NA	NA	NA	NA	NA	NA	NA	NA	NA	NA	NA	NA	NA	NA	NA	NA	NA	NA	NA	NA	NA	NA	NA	NA	NA
365	1	1	78	Italy	NA	NA	2/22/2020	NA	NA	NA	NA	NA	2/22/2020	NA	NA	NA	NA	NA	NA	NA	NA	NA	NA	NA	NA	NA	NA	NA	NA	NA	NA	NA	NA	NA	NA	NA	NA	NA	NA	NA	NA	NA	NA	NA	NA	NA	NA	NA	NA
366	1	1	78	Italy	NA	NA	2/22/2020	NA	NA	NA	NA	NA	2/22/2020	NA	NA	NA	NA	NA	NA	NA	NA	NA	NA	NA	NA	NA	NA	NA	NA	NA	NA	NA	NA	NA	NA	NA	NA	NA	NA	NA	NA	NA	NA	NA	NA	NA	NA	NA	NA
367	1	0	68	Italy	NA	NA	2/23/2020	NA	NA	NA	NA	NA	2/23/2020	NA	NA	NA	NA	NA	NA	NA	NA	NA	NA	NA	NA	NA	NA	NA	NA	NA	NA	NA	NA	NA	NA	NA	NA	NA	NA	NA	NA	NA	NA	NA	NA	NA	NA	NA	NA
368	1	1	84	Italy	NA	NA	2/24/2020	NA	NA	NA	NA	NA	2/24/2020	NA	NA	NA	NA	NA	NA	NA	NA	NA	NA	NA	NA	NA	NA	NA	NA	NA	NA	NA	NA	NA	NA	NA	NA	NA	NA	NA	NA	NA	NA	NA	NA	NA	NA	NA	NA
369	1	1	88	Italy	NA	NA	2/24/2020	NA	NA	NA	NA	NA	2/24/2020	NA	NA	NA	NA	NA	NA	NA	NA	NA	NA	NA	NA	NA	NA	NA	NA	NA	NA	NA	NA	NA	NA	NA	NA	NA	NA	NA	NA	NA	NA	NA	NA	NA	NA	NA	NA
370	1	1	80	Italy	NA	NA	2/24/2020	NA	NA	NA	NA	NA	2/24/2020	NA	NA	NA	NA	NA	NA	NA	NA	NA	NA	NA	NA	NA	NA	NA	NA	NA	NA	NA	NA	NA	NA	NA	NA	NA	NA	NA	NA	NA	NA	NA	NA	NA	NA	NA	NA
371	1	1	62	Italy	NA	NA	2/24/2020	NA	NA	NA	NA	NA	2/24/2020	NA	NA	NA	NA	NA	NA	NA	NA	NA	NA	NA	NA	NA	NA	NA	NA	NA	NA	NA	NA	NA	NA	NA	NA	NA	NA	NA	NA	NA	NA	NA	NA	NA	NA	NA	NA
372	1	1	84	Italy	NA	NA	2/25/2020	NA	NA	NA	NA	NA	2/25/2020	NA	NA	NA	NA	NA	NA	NA	NA	NA	NA	NA	NA	NA	NA	NA	NA	NA	NA	NA	NA	NA	NA	NA	NA	NA	NA	NA	NA	NA	NA	NA	NA	NA	NA	NA	NA
373	1	1	91	Italy	NA	NA	2/25/2020	NA	NA	NA	NA	NA	2/25/2020	NA	NA	NA	NA	NA	NA	NA	NA	NA	NA	NA	NA	NA	NA	NA	NA	NA	NA	NA	NA	NA	NA	NA	NA	NA	NA	NA	NA	NA	NA	NA	NA	NA	NA	NA	NA
374	1	0	83	Italy	NA	NA	2/25/2020	NA	NA	NA	NA	NA	2/25/2020	NA	NA	NA	NA	NA	NA	NA	NA	NA	NA	NA	NA	NA	NA	NA	NA	NA	NA	NA	NA	NA	NA	NA	NA	NA	NA	NA	NA	NA	NA	NA	NA	NA	NA	NA	NA
375	1	0	76	Italy	NA	NA	2/25/2020	NA	NA	NA	NA	NA	2/25/2020	NA	NA	NA	NA	NA	NA	NA	NA	NA	NA	NA	NA	NA	NA	NA	NA	NA	NA	NA	NA	NA	NA	NA	NA	NA	NA	NA	NA	NA	NA	NA	NA	NA	NA	NA	NA
376	1	1	69	Italy	NA	NA	2/26/2020	NA	NA	NA	NA	NA	2/26/2020	NA	NA	NA	NA	NA	NA	NA	NA	NA	NA	NA	NA	NA	NA	NA	NA	NA	NA	NA	NA	NA	NA	NA	NA	NA	NA	NA	NA	NA	NA	NA	NA	NA	NA	NA	NA
377	1	1	70	Italy	NA	NA	2/26/2020	NA	NA	NA	NA	NA	2/26/2020	NA	NA	NA	NA	NA	NA	NA	NA	NA	NA	NA	NA	NA	NA	NA	NA	NA	NA	NA	NA	NA	NA	NA	NA	NA	NA	NA	NA	NA	NA	NA	NA	NA	NA	NA	NA
378	1	1	73	Italy	NA	NA	2/28/2020	NA	NA	NA	NA	NA	2/28/2020	NA	NA	NA	NA	NA	NA	NA	NA	NA	NA	NA	NA	NA	NA	NA	NA	NA	NA	NA	NA	NA	NA	NA	NA	NA	NA	NA	NA	NA	NA	NA	NA	NA	NA	NA	NA
379	1	0	80	Italy	NA	NA	2/28/2020	NA	NA	NA	NA	NA	2/28/2020	NA	NA	NA	NA	NA	NA	NA	NA	NA	NA	NA	NA	NA	NA	NA	NA	NA	NA	NA	NA	NA	NA	NA	NA	NA	NA	NA	NA	NA	NA	NA	NA	NA	NA	NA	NA
380	1	0	86	Italy	NA	NA	2/28/2020	NA	NA	NA	NA	NA	2/28/2020	NA	NA	NA	NA	NA	NA	NA	NA	NA	NA	NA	NA	NA	NA	NA	NA	NA	NA	NA	NA	NA	NA	NA	NA	NA	NA	NA	NA	NA	NA	NA	NA	NA	NA	NA	NA
381	1	1	85	Italy	NA	NA	2/28/2020	NA	NA	NA	NA	NA	2/28/2020	NA	NA	NA	NA	NA	NA	NA	NA	NA	NA	NA	NA	NA	NA	NA	NA	NA	NA	NA	NA	NA	NA	NA	NA	NA	NA	NA	NA	NA	NA	NA	NA	NA	NA	NA	NA
382	1	1	79	Jamaica	NA	NA	3/18/2020	NA	NA	NA	NA	NA	3/18/2020	NA	NA	NA	NA	NA	NA	NA	NA	NA	NA	NA	NA	NA	NA	NA	NA	NA	NA	NA	NA	NA	NA	NA	NA	NA	NA	NA	NA	NA	NA	NA	NA	NA	NA	NA	NA
383	1	1	56	Jamaica	NA	NA	3/31/2020	NA	NA	NA	NA	NA	3/31/2020	NA	NA	NA	NA	NA	NA	NA	NA	NA	NA	NA	NA	NA	NA	NA	NA	NA	NA	NA	NA	NA	NA	NA	NA	NA	NA	NA	NA	NA	NA	NA	NA	NA	NA	NA	NA
384	1	0	83	Lithuania	NA	NA	3/20/2020	NA	NA	NA	NA	NA	3/20/2020	NA	NA	NA	NA	NA	NA	NA	NA	NA	NA	NA	NA	NA	NA	NA	NA	NA	NA	NA	NA	NA	NA	NA	NA	NA	NA	NA	NA	NA	NA	NA	NA	NA	NA	NA	NA
385	1	0	90	Lithuania	NA	NA	3/24/2020	NA	NA	NA	NA	NA	3/24/2020	NA	NA	NA	NA	NA	NA	NA	NA	NA	NA	NA	NA	NA	NA	NA	NA	NA	NA	NA	NA	NA	NA	NA	NA	NA	NA	NA	NA	NA	NA	NA	NA	NA	NA	NA	NA
386	1	1	94	Lithuania	NA	NA	3/26/2020	NA	NA	NA	NA	NA	3/26/2020	NA	NA	NA	NA	NA	NA	NA	NA	NA	NA	NA	NA	NA	NA	NA	NA	NA	NA	NA	NA	NA	NA	NA	NA	NA	NA	NA	NA	NA	NA	NA	NA	NA	NA	NA	NA
387	1	1	75	Lithuania	NA	NA	3/28/2020	NA	NA	NA	NA	NA	3/28/2020	NA	NA	NA	NA	NA	NA	NA	NA	NA	NA	NA	NA	NA	NA	NA	NA	NA	NA	NA	NA	NA	NA	NA	NA	NA	NA	NA	NA	NA	NA	NA	NA	NA	NA	NA	NA
388	1	1	78	Lithuania	NA	NA	3/28/2020	NA	NA	NA	NA	NA	3/28/2020	NA	NA	NA	NA	NA	NA	NA	NA	NA	NA	NA	NA	NA	NA	NA	NA	NA	NA	NA	NA	NA	NA	NA	NA	NA	NA	NA	NA	NA	NA	NA	NA	NA	NA	NA	NA
389	1	1	77	Lithuania	NA	NA	3/31/2020	NA	NA	NA	NA	NA	3/31/2020	NA	NA	NA	NA	NA	NA	NA	NA	NA	NA	NA	NA	NA	NA	NA	NA	NA	NA	NA	NA	NA	NA	NA	NA	NA	NA	NA	NA	NA	NA	NA	NA	NA	NA	NA	NA
390	1	1	94	Luxembourg	NA	NA	3/13/2020	NA	NA	NA	NA	NA	3/13/2020	NA	NA	NA	NA	NA	NA	NA	NA	NA	NA	NA	NA	NA	NA	NA	NA	NA	NA	NA	NA	NA	NA	NA	NA	NA	NA	NA	NA	NA	NA	NA	NA	NA	NA	NA	NA
391	1	1	41	Mexico	NA	NA	3/18/2020	NA	NA	NA	NA	NA	3/18/2020	NA	NA	NA	NA	NA	NA	NA	NA	NA	NA	NA	NA	NA	NA	NA	NA	NA	NA	NA	NA	NA	NA	NA	NA	NA	NA	NA	NA	NA	NA	NA	NA	NA	NA	NA	NA
392	1	1	74	Mexico	NA	NA	3/20/2020	NA	NA	NA	NA	NA	3/20/2020	NA	NA	NA	NA	NA	NA	NA	NA	NA	NA	NA	NA	NA	NA	NA	NA	NA	NA	NA	NA	NA	NA	NA	NA	NA	NA	NA	NA	NA	NA	NA	NA	NA	NA	NA	NA
393	1	0	61	Mexico	NA	NA	3/23/2020	NA	NA	NA	NA	NA	3/23/2020	NA	NA	NA	NA	NA	NA	NA	NA	NA	NA	NA	NA	NA	NA	NA	NA	NA	NA	NA	NA	NA	NA	NA	NA	NA	NA	NA	NA	NA	NA	NA	NA	NA	NA	NA	NA
394	1	1	55	Mexico	NA	NA	3/23/2020	NA	NA	NA	NA	NA	3/23/2020	NA	NA	NA	NA	NA	NA	NA	NA	NA	NA	NA	NA	NA	NA	NA	NA	NA	NA	NA	NA	NA	NA	NA	NA	NA	NA	NA	NA	NA	NA	NA	NA	NA	NA	NA	NA
395	1	1	71	Mexico	NA	NA	3/23/2020	NA	NA	NA	NA	NA	3/23/2020	NA	NA	NA	NA	NA	NA	NA	NA	NA	NA	NA	NA	NA	NA	NA	NA	NA	NA	NA	NA	NA	NA	NA	NA	NA	NA	NA	NA	NA	NA	NA	NA	NA	NA	NA	NA
396	1	1	74	Mexico	NA	NA	3/26/2020	NA	NA	NA	NA	NA	3/26/2020	NA	NA	NA	NA	NA	NA	NA	NA	NA	NA	NA	NA	NA	NA	NA	NA	NA	NA	NA	NA	NA	NA	NA	NA	NA	NA	NA	NA	NA	NA	NA	NA	NA	NA	NA	NA
397	1	1	57	Mexico	NA	NA	3/26/2020	NA	NA	NA	NA	NA	3/26/2020	NA	NA	NA	NA	NA	NA	NA	NA	NA	NA	NA	NA	NA	NA	NA	NA	NA	NA	NA	NA	NA	NA	NA	NA	NA	NA	NA	NA	NA	NA	NA	NA	NA	NA	NA	NA
398	1	1	37	Mexico	NA	NA	3/28/2020	NA	NA	NA	NA	NA	3/28/2020	NA	NA	NA	NA	NA	NA	NA	NA	NA	NA	NA	NA	NA	NA	NA	NA	NA	NA	NA	NA	NA	NA	NA	NA	NA	NA	NA	NA	NA	NA	NA	NA	NA	NA	NA	NA
399	1	1	58	Mexico	NA	NA	3/29/2020	NA	NA	NA	NA	NA	3/29/2020	NA	NA	NA	NA	NA	NA	NA	NA	NA	NA	NA	NA	NA	NA	NA	NA	NA	NA	NA	NA	NA	NA	NA	NA	NA	NA	NA	NA	NA	NA	NA	NA	NA	NA	NA	NA
400	1	1	70	Mexico	NA	NA	3/23/2020	NA	NA	NA	NA	NA	3/23/2020	NA	NA	NA	NA	NA	NA	NA	NA	NA	NA	NA	NA	NA	NA	NA	NA	NA	NA	NA	NA	NA	NA	NA	NA	NA	NA	NA	NA	NA	NA	NA	NA	NA	NA	NA	NA
401	1	0	61	Moldova	NA	NA	3/18/2020	NA	NA	NA	NA	NA	3/18/2020	NA	NA	NA	NA	NA	NA	NA	NA	NA	NA	NA	NA	NA	NA	NA	NA	NA	NA	NA	NA	NA	NA	NA	NA	NA	NA	NA	NA	NA	NA	NA	NA	NA	NA	NA	NA
402	1	0	79	Moldova	NA	NA	3/27/2020	NA	NA	NA	NA	NA	3/27/2020	NA	NA	NA	NA	NA	NA	NA	NA	NA	NA	NA	NA	NA	NA	NA	NA	NA	NA	NA	NA	NA	NA	NA	NA	NA	NA	NA	NA	NA	NA	NA	NA	NA	NA	NA	NA
403	1	1	65	Montenegro	NA	NA	3/22/2020	NA	NA	NA	NA	NA	3/22/2020	NA	NA	NA	NA	NA	NA	NA	NA	NA	NA	NA	NA	NA	NA	NA	NA	NA	NA	NA	NA	NA	NA	NA	NA	NA	NA	NA	NA	NA	NA	NA	NA	NA	NA	NA	NA
404	1	1	86	Netherlands	NA	NA	3/6/2020	NA	NA	NA	NA	NA	3/6/2020	NA	NA	NA	NA	NA	NA	NA	NA	NA	NA	NA	NA	NA	NA	NA	NA	NA	NA	NA	NA	NA	NA	NA	NA	NA	NA	NA	NA	NA	NA	NA	NA	NA	NA	NA	NA
405	1	1	86	Netherlands	NA	NA	3/8/2020	NA	NA	NA	NA	NA	3/8/2020	NA	NA	NA	NA	NA	NA	NA	NA	NA	NA	NA	NA	NA	NA	NA	NA	NA	NA	NA	NA	NA	NA	NA	NA	NA	NA	NA	NA	NA	NA	NA	NA	NA	NA	NA	NA
406	1	1	82	Netherlands	NA	NA	3/8/2020	NA	NA	NA	NA	NA	3/8/2020	NA	NA	NA	NA	NA	NA	NA	NA	NA	NA	NA	NA	NA	NA	NA	NA	NA	NA	NA	NA	NA	NA	NA	NA	NA	NA	NA	NA	NA	NA	NA	NA	NA	NA	NA	NA
407	1	1	90	Netherlands	NA	NA	3/25/2020	NA	NA	NA	NA	NA	3/25/2020	NA	NA	NA	NA	NA	NA	NA	NA	NA	NA	NA	NA	NA	NA	NA	NA	NA	NA	NA	NA	NA	NA	NA	NA	NA	NA	NA	NA	NA	NA	NA	NA	NA	NA	NA	NA
408	1	1	76	Netherlands	NA	NA	3/25/2020	NA	NA	NA	NA	NA	3/25/2020	NA	NA	NA	NA	NA	NA	NA	NA	NA	NA	NA	NA	NA	NA	NA	NA	NA	NA	NA	NA	NA	NA	NA	NA	NA	NA	NA	NA	NA	NA	NA	NA	NA	NA	NA	NA
409	1	1	63	North Macedonia	NA	NA	3/22/2020	NA	NA	NA	NA	NA	3/22/2020	NA	NA	NA	NA	NA	NA	NA	NA	NA	NA	NA	NA	NA	NA	NA	NA	NA	NA	NA	NA	NA	NA	NA	NA	NA	NA	NA	NA	NA	NA	NA	NA	NA	NA	NA	NA
410	1	1	45	North Macedonia	NA	NA	3/31/2020	NA	NA	NA	NA	NA	3/31/2020	NA	NA	NA	NA	NA	NA	NA	NA	NA	NA	NA	NA	NA	NA	NA	NA	NA	NA	NA	NA	NA	NA	NA	NA	NA	NA	NA	NA	NA	NA	NA	NA	NA	NA	NA	NA
411	1	1	78	North Macedonia	NA	NA	3/31/2020	NA	NA	NA	NA	NA	3/31/2020	NA	NA	NA	NA	NA	NA	NA	NA	NA	NA	NA	NA	NA	NA	NA	NA	NA	NA	NA	NA	NA	NA	NA	NA	NA	NA	NA	NA	NA	NA	NA	NA	NA	NA	NA	NA
412	1	1	65	North Macedonia	NA	NA	3/31/2020	NA	NA	NA	NA	NA	3/31/2020	NA	NA	NA	NA	NA	NA	NA	NA	NA	NA	NA	NA	NA	NA	NA	NA	NA	NA	NA	NA	NA	NA	NA	NA	NA	NA	NA	NA	NA	NA	NA	NA	NA	NA	NA	NA
413	1	1	72	Norway	NA	NA	3/23/2020	NA	NA	NA	NA	NA	3/23/2020	NA	NA	NA	NA	NA	NA	NA	NA	NA	NA	NA	NA	NA	NA	NA	NA	NA	NA	NA	NA	NA	NA	NA	NA	NA	NA	NA	NA	NA	NA	NA	NA	NA	NA	NA	NA
414	1	1	64	Panama	NA	NA	3/9/2020	NA	NA	NA	NA	NA	3/9/2020	NA	NA	NA	NA	NA	NA	NA	NA	NA	NA	NA	NA	NA	NA	NA	NA	NA	NA	NA	NA	NA	NA	NA	NA	NA	NA	NA	NA	NA	NA	NA	NA	NA	NA	NA	NA
415	1	0	13	Panama	NA	NA	3/22/2020	NA	NA	NA	NA	NA	3/22/2020	NA	NA	NA	NA	NA	NA	NA	NA	NA	NA	NA	NA	NA	NA	NA	NA	NA	NA	NA	NA	NA	NA	NA	NA	NA	NA	NA	NA	NA	NA	NA	NA	NA	NA	NA	NA
416	1	1	92	Panama	NA	NA	3/22/2020	NA	NA	NA	NA	NA	3/22/2020	NA	NA	NA	NA	NA	NA	NA	NA	NA	NA	NA	NA	NA	NA	NA	NA	NA	NA	NA	NA	NA	NA	NA	NA	NA	NA	NA	NA	NA	NA	NA	NA	NA	NA	NA	NA
417	1	0	57	Poland	NA	NA	3/12/2020	NA	NA	NA	NA	NA	3/12/2020	NA	NA	NA	NA	NA	NA	NA	NA	NA	NA	NA	NA	NA	NA	NA	NA	NA	NA	NA	NA	NA	NA	NA	NA	NA	NA	NA	NA	NA	NA	NA	NA	NA	NA	NA	NA
418	1	0	56	Poland	NA	NA	3/14/2020	NA	NA	NA	NA	NA	3/14/2020	NA	NA	NA	NA	NA	NA	NA	NA	NA	NA	NA	NA	NA	NA	NA	NA	NA	NA	NA	NA	NA	NA	NA	NA	NA	NA	NA	NA	NA	NA	NA	NA	NA	NA	NA	NA
419	1	1	78	Poland	NA	NA	3/19/2020	NA	NA	NA	NA	NA	3/19/2020	NA	NA	NA	NA	NA	NA	NA	NA	NA	NA	NA	NA	NA	NA	NA	NA	NA	NA	NA	NA	NA	NA	NA	NA	NA	NA	NA	NA	NA	NA	NA	NA	NA	NA	NA	NA
420	1	1	43	Poland	NA	NA	3/22/2020	NA	NA	NA	NA	NA	3/22/2020	NA	NA	NA	NA	NA	NA	NA	NA	NA	NA	NA	NA	NA	NA	NA	NA	NA	NA	NA	NA	NA	NA	NA	NA	NA	NA	NA	NA	NA	NA	NA	NA	NA	NA	NA	NA
421	1	1	71	Poland	NA	NA	3/24/2020	NA	NA	NA	NA	NA	3/24/2020	NA	NA	NA	NA	NA	NA	NA	NA	NA	NA	NA	NA	NA	NA	NA	NA	NA	NA	NA	NA	NA	NA	NA	NA	NA	NA	NA	NA	NA	NA	NA	NA	NA	NA	NA	NA
422	1	1	80	Poland	NA	NA	3/25/2020	NA	NA	NA	NA	NA	3/25/2020	NA	NA	NA	NA	NA	NA	NA	NA	NA	NA	NA	NA	NA	NA	NA	NA	NA	NA	NA	NA	NA	NA	NA	NA	NA	NA	NA	NA	NA	NA	NA	NA	NA	NA	NA	NA
423	1	1	78	Poland	NA	NA	3/26/2020	NA	NA	NA	NA	NA	3/26/2020	NA	NA	NA	NA	NA	NA	NA	NA	NA	NA	NA	NA	NA	NA	NA	NA	NA	NA	NA	NA	NA	NA	NA	NA	NA	NA	NA	NA	NA	NA	NA	NA	NA	NA	NA	NA
424	1	0	84	Poland	NA	NA	3/26/2020	NA	NA	NA	NA	NA	3/26/2020	NA	NA	NA	NA	NA	NA	NA	NA	NA	NA	NA	NA	NA	NA	NA	NA	NA	NA	NA	NA	NA	NA	NA	NA	NA	NA	NA	NA	NA	NA	NA	NA	NA	NA	NA	NA
425	1	1	66	Poland	NA	NA	3/27/2020	NA	NA	NA	NA	NA	3/27/2020	NA	NA	NA	NA	NA	NA	NA	NA	NA	NA	NA	NA	NA	NA	NA	NA	NA	NA	NA	NA	NA	NA	NA	NA	NA	NA	NA	NA	NA	NA	NA	NA	NA	NA	NA	NA
426	1	1	67	Poland	NA	NA	3/28/2020	NA	NA	NA	NA	NA	3/28/2020	NA	NA	NA	NA	NA	NA	NA	NA	NA	NA	NA	NA	NA	NA	NA	NA	NA	NA	NA	NA	NA	NA	NA	NA	NA	NA	NA	NA	NA	NA	NA	NA	NA	NA	NA	NA
427	1	1	70	Poland	NA	NA	3/28/2020	NA	NA	NA	NA	NA	3/28/2020	NA	NA	NA	NA	NA	NA	NA	NA	NA	NA	NA	NA	NA	NA	NA	NA	NA	NA	NA	NA	NA	NA	NA	NA	NA	NA	NA	NA	NA	NA	NA	NA	NA	NA	NA	NA
428	1	1	72	Poland	NA	NA	3/29/2020	NA	NA	NA	NA	NA	3/29/2020	NA	NA	NA	NA	NA	NA	NA	NA	NA	NA	NA	NA	NA	NA	NA	NA	NA	NA	NA	NA	NA	NA	NA	NA	NA	NA	NA	NA	NA	NA	NA	NA	NA	NA	NA	NA
429	1	1	89	Poland	NA	NA	3/29/2020	NA	NA	NA	NA	NA	3/29/2020	NA	NA	NA	NA	NA	NA	NA	NA	NA	NA	NA	NA	NA	NA	NA	NA	NA	NA	NA	NA	NA	NA	NA	NA	NA	NA	NA	NA	NA	NA	NA	NA	NA	NA	NA	NA
430	1	1	82	Poland	NA	NA	3/29/2020	NA	NA	NA	NA	NA	3/29/2020	NA	NA	NA	NA	NA	NA	NA	NA	NA	NA	NA	NA	NA	NA	NA	NA	NA	NA	NA	NA	NA	NA	NA	NA	NA	NA	NA	NA	NA	NA	NA	NA	NA	NA	NA	NA
431	1	1	75	Poland	NA	NA	3/29/2020	NA	NA	NA	NA	NA	3/29/2020	NA	NA	NA	NA	NA	NA	NA	NA	NA	NA	NA	NA	NA	NA	NA	NA	NA	NA	NA	NA	NA	NA	NA	NA	NA	NA	NA	NA	NA	NA	NA	NA	NA	NA	NA	NA
432	1	1	71	Poland	NA	NA	3/30/2020	NA	NA	NA	NA	NA	3/30/2020	NA	NA	NA	NA	NA	NA	NA	NA	NA	NA	NA	NA	NA	NA	NA	NA	NA	NA	NA	NA	NA	NA	NA	NA	NA	NA	NA	NA	NA	NA	NA	NA	NA	NA	NA	NA
433	1	0	87	Poland	NA	NA	3/30/2020	NA	NA	NA	NA	NA	3/30/2020	NA	NA	NA	NA	NA	NA	NA	NA	NA	NA	NA	NA	NA	NA	NA	NA	NA	NA	NA	NA	NA	NA	NA	NA	NA	NA	NA	NA	NA	NA	NA	NA	NA	NA	NA	NA
434	1	0	73	Poland	NA	NA	3/30/2020	NA	NA	NA	NA	NA	3/30/2020	NA	NA	NA	NA	NA	NA	NA	NA	NA	NA	NA	NA	NA	NA	NA	NA	NA	NA	NA	NA	NA	NA	NA	NA	NA	NA	NA	NA	NA	NA	NA	NA	NA	NA	NA	NA
435	1	0	73	Poland	NA	NA	3/30/2020	NA	NA	NA	NA	NA	3/30/2020	NA	NA	NA	NA	NA	NA	NA	NA	NA	NA	NA	NA	NA	NA	NA	NA	NA	NA	NA	NA	NA	NA	NA	NA	NA	NA	NA	NA	NA	NA	NA	NA	NA	NA	NA	NA
436	1	1	60	Poland	NA	NA	3/30/2020	NA	NA	NA	NA	NA	3/30/2020	NA	NA	NA	NA	NA	NA	NA	NA	NA	NA	NA	NA	NA	NA	NA	NA	NA	NA	NA	NA	NA	NA	NA	NA	NA	NA	NA	NA	NA	NA	NA	NA	NA	NA	NA	NA
437	1	1	71	Poland	NA	NA	3/31/2020	NA	NA	NA	NA	NA	3/31/2020	NA	NA	NA	NA	NA	NA	NA	NA	NA	NA	NA	NA	NA	NA	NA	NA	NA	NA	NA	NA	NA	NA	NA	NA	NA	NA	NA	NA	NA	NA	NA	NA	NA	NA	NA	NA
438	1	1	80	Poland	NA	NA	3/31/2020	NA	NA	NA	NA	NA	3/31/2020	NA	NA	NA	NA	NA	NA	NA	NA	NA	NA	NA	NA	NA	NA	NA	NA	NA	NA	NA	NA	NA	NA	NA	NA	NA	NA	NA	NA	NA	NA	NA	NA	NA	NA	NA	NA
439	1	1	37	Poland	NA	NA	3/31/2020	NA	NA	NA	NA	NA	3/31/2020	NA	NA	NA	NA	NA	NA	NA	NA	NA	NA	NA	NA	NA	NA	NA	NA	NA	NA	NA	NA	NA	NA	NA	NA	NA	NA	NA	NA	NA	NA	NA	NA	NA	NA	NA	NA
440	1	0	70	Poland	NA	NA	3/31/2020	NA	NA	NA	NA	NA	3/31/2020	NA	NA	NA	NA	NA	NA	NA	NA	NA	NA	NA	NA	NA	NA	NA	NA	NA	NA	NA	NA	NA	NA	NA	NA	NA	NA	NA	NA	NA	NA	NA	NA	NA	NA	NA	NA
441	1	1	80	Portugal	NA	NA	3/16/2020	NA	NA	NA	NA	NA	3/16/2020	NA	NA	NA	NA	NA	NA	NA	NA	NA	NA	NA	NA	NA	NA	NA	NA	NA	NA	NA	NA	NA	NA	NA	NA	NA	NA	NA	NA	NA	NA	NA	NA	NA	NA	NA	NA
442	1	1	73	Portugal	NA	NA	3/18/2020	NA	NA	NA	NA	NA	3/18/2020	NA	NA	NA	NA	NA	NA	NA	NA	NA	NA	NA	NA	NA	NA	NA	NA	NA	NA	NA	NA	NA	NA	NA	NA	NA	NA	NA	NA	NA	NA	NA	NA	NA	NA	NA	NA
443	1	1	14	Portugal	NA	NA	3/29/2020	NA	NA	NA	NA	NA	3/29/2020	NA	NA	NA	NA	NA	NA	NA	NA	NA	NA	NA	NA	NA	NA	NA	NA	NA	NA	NA	NA	NA	NA	NA	NA	NA	NA	NA	NA	NA	NA	NA	NA	NA	NA	NA	NA
444	1	1	67	Romania	NA	NA	3/22/2020	NA	NA	NA	NA	NA	3/22/2020	NA	NA	NA	NA	NA	NA	NA	NA	NA	NA	NA	NA	NA	NA	NA	NA	NA	NA	NA	NA	NA	NA	NA	NA	NA	NA	NA	NA	NA	NA	NA	NA	NA	NA	NA	NA
445	1	0	72	Romania	NA	NA	3/23/2020	NA	NA	NA	NA	NA	3/23/2020	NA	NA	NA	NA	NA	NA	NA	NA	NA	NA	NA	NA	NA	NA	NA	NA	NA	NA	NA	NA	NA	NA	NA	NA	NA	NA	NA	NA	NA	NA	NA	NA	NA	NA	NA	NA
446	1	1	71	Romania	NA	NA	3/23/2020	NA	NA	NA	NA	NA	3/23/2020	NA	NA	NA	NA	NA	NA	NA	NA	NA	NA	NA	NA	NA	NA	NA	NA	NA	NA	NA	NA	NA	NA	NA	NA	NA	NA	NA	NA	NA	NA	NA	NA	NA	NA	NA	NA
447	1	0	79	Russian	NA	NA	3/19/2020	NA	NA	NA	NA	NA	3/19/2020	NA	NA	NA	NA	NA	NA	NA	NA	NA	NA	NA	NA	NA	NA	NA	NA	NA	NA	NA	NA	NA	NA	NA	NA	NA	NA	NA	NA	NA	NA	NA	NA	NA	NA	NA	NA
448	1	0	83	Russian	NA	NA	3/22/2020	NA	NA	NA	NA	NA	3/22/2020	NA	NA	NA	NA	NA	NA	NA	NA	NA	NA	NA	NA	NA	NA	NA	NA	NA	NA	NA	NA	NA	NA	NA	NA	NA	NA	NA	NA	NA	NA	NA	NA	NA	NA	NA	NA
449	1	0	56	Russian	NA	NA	3/27/2020	NA	NA	NA	NA	NA	3/27/2020	NA	NA	NA	NA	NA	NA	NA	NA	NA	NA	NA	NA	NA	NA	NA	NA	NA	NA	NA	NA	NA	NA	NA	NA	NA	NA	NA	NA	NA	NA	NA	NA	NA	NA	NA	NA
450	1	1	57	Russian	NA	NA	3/28/2020	NA	NA	NA	NA	NA	3/28/2020	NA	NA	NA	NA	NA	NA	NA	NA	NA	NA	NA	NA	NA	NA	NA	NA	NA	NA	NA	NA	NA	NA	NA	NA	NA	NA	NA	NA	NA	NA	NA	NA	NA	NA	NA	NA
451	1	0	69	Russian	NA	NA	3/28/2020	NA	NA	NA	NA	NA	3/28/2020	NA	NA	NA	NA	NA	NA	NA	NA	NA	NA	NA	NA	NA	NA	NA	NA	NA	NA	NA	NA	NA	NA	NA	NA	NA	NA	NA	NA	NA	NA	NA	NA	NA	NA	NA	NA
452	1	1	88	San Marino	NA	NA	3/1/2020	NA	NA	NA	NA	NA	3/1/2020	NA	NA	NA	NA	NA	NA	NA	NA	NA	NA	NA	NA	NA	NA	NA	NA	NA	NA	NA	NA	NA	NA	NA	NA	NA	NA	NA	NA	NA	NA	NA	NA	NA	NA	NA	NA
453	1	0	92	Serbia	NA	NA	3/22/2020	NA	NA	NA	NA	NA	3/22/2020	NA	NA	NA	NA	NA	NA	NA	NA	NA	NA	NA	NA	NA	NA	NA	NA	NA	NA	NA	NA	NA	NA	NA	NA	NA	NA	NA	NA	NA	NA	NA	NA	NA	NA	NA	NA
454	1	1	80	Serbia	NA	NA	3/24/2020	NA	NA	NA	NA	NA	3/24/2020	NA	NA	NA	NA	NA	NA	NA	NA	NA	NA	NA	NA	NA	NA	NA	NA	NA	NA	NA	NA	NA	NA	NA	NA	NA	NA	NA	NA	NA	NA	NA	NA	NA	NA	NA	NA
455	1	0	48	Serbia	NA	NA	3/26/2020	NA	NA	NA	NA	NA	3/26/2020	NA	NA	NA	NA	NA	NA	NA	NA	NA	NA	NA	NA	NA	NA	NA	NA	NA	NA	NA	NA	NA	NA	NA	NA	NA	NA	NA	NA	NA	NA	NA	NA	NA	NA	NA	NA
456	1	1	63	Serbia	NA	NA	3/27/2020	NA	NA	NA	NA	NA	3/27/2020	NA	NA	NA	NA	NA	NA	NA	NA	NA	NA	NA	NA	NA	NA	NA	NA	NA	NA	NA	NA	NA	NA	NA	NA	NA	NA	NA	NA	NA	NA	NA	NA	NA	NA	NA	NA
457	1	1	62	Serbia	NA	NA	3/28/2020	NA	NA	NA	NA	NA	3/28/2020	NA	NA	NA	NA	NA	NA	NA	NA	NA	NA	NA	NA	NA	NA	NA	NA	NA	NA	NA	NA	NA	NA	NA	NA	NA	NA	NA	NA	NA	NA	NA	NA	NA	NA	NA	NA
458	1	0	86	Serbia	NA	NA	3/28/2020	NA	NA	NA	NA	NA	3/28/2020	NA	NA	NA	NA	NA	NA	NA	NA	NA	NA	NA	NA	NA	NA	NA	NA	NA	NA	NA	NA	NA	NA	NA	NA	NA	NA	NA	NA	NA	NA	NA	NA	NA	NA	NA	NA
459	1	0	82	Serbia	NA	NA	3/28/2020	NA	NA	NA	NA	NA	3/28/2020	NA	NA	NA	NA	NA	NA	NA	NA	NA	NA	NA	NA	NA	NA	NA	NA	NA	NA	NA	NA	NA	NA	NA	NA	NA	NA	NA	NA	NA	NA	NA	NA	NA	NA	NA	NA
460	1	0	90	Slovenia	NA	NA	3/22/2020	NA	NA	NA	NA	NA	3/22/2020	NA	NA	NA	NA	NA	NA	NA	NA	NA	NA	NA	NA	NA	NA	NA	NA	NA	NA	NA	NA	NA	NA	NA	NA	NA	NA	NA	NA	NA	NA	NA	NA	NA	NA	NA	NA
461	1	1	67	Slovenia	NA	NA	3/23/2020	NA	NA	NA	NA	NA	3/23/2020	NA	NA	NA	NA	NA	NA	NA	NA	NA	NA	NA	NA	NA	NA	NA	NA	NA	NA	NA	NA	NA	NA	NA	NA	NA	NA	NA	NA	NA	NA	NA	NA	NA	NA	NA	NA
462	1	1	69	Spain	NA	NA	2/13/2020	NA	NA	NA	NA	NA	2/13/2020	NA	NA	NA	NA	NA	NA	NA	NA	NA	NA	NA	NA	NA	NA	NA	NA	NA	NA	NA	NA	NA	NA	NA	NA	NA	NA	NA	NA	NA	NA	NA	NA	NA	NA	NA	NA
463	1	1	82	Spain	NA	NA	3/3/2020	NA	NA	NA	NA	NA	3/3/2020	NA	NA	NA	NA	NA	NA	NA	NA	NA	NA	NA	NA	NA	NA	NA	NA	NA	NA	NA	NA	NA	NA	NA	NA	NA	NA	NA	NA	NA	NA	NA	NA	NA	NA	NA	NA
464	1	0	99	Spain	NA	NA	3/3/2020	NA	NA	NA	NA	NA	3/3/2020	NA	NA	NA	NA	NA	NA	NA	NA	NA	NA	NA	NA	NA	NA	NA	NA	NA	NA	NA	NA	NA	NA	NA	NA	NA	NA	NA	NA	NA	NA	NA	NA	NA	NA	NA	NA
465	1	1	87	Spain	NA	NA	3/6/2020	NA	NA	NA	NA	NA	3/6/2020	NA	NA	NA	NA	NA	NA	NA	NA	NA	NA	NA	NA	NA	NA	NA	NA	NA	NA	NA	NA	NA	NA	NA	NA	NA	NA	NA	NA	NA	NA	NA	NA	NA	NA	NA	NA
466	1	1	76	Spain	NA	NA	3/6/2020	NA	NA	NA	NA	NA	3/6/2020	NA	NA	NA	NA	NA	NA	NA	NA	NA	NA	NA	NA	NA	NA	NA	NA	NA	NA	NA	NA	NA	NA	NA	NA	NA	NA	NA	NA	NA	NA	NA	NA	NA	NA	NA	NA
467	1	1	91	Spain	NA	NA	3/6/2020	NA	NA	NA	NA	NA	3/6/2020	NA	NA	NA	NA	NA	NA	NA	NA	NA	NA	NA	NA	NA	NA	NA	NA	NA	NA	NA	NA	NA	NA	NA	NA	NA	NA	NA	NA	NA	NA	NA	NA	NA	NA	NA	NA
468	1	1	83	Spain	NA	NA	3/6/2020	NA	NA	NA	NA	NA	3/6/2020	NA	NA	NA	NA	NA	NA	NA	NA	NA	NA	NA	NA	NA	NA	NA	NA	NA	NA	NA	NA	NA	NA	NA	NA	NA	NA	NA	NA	NA	NA	NA	NA	NA	NA	NA	NA
469	1	0	92	Spain	NA	NA	3/10/2020	NA	NA	NA	NA	NA	3/10/2020	NA	NA	NA	NA	NA	NA	NA	NA	NA	NA	NA	NA	NA	NA	NA	NA	NA	NA	NA	NA	NA	NA	NA	NA	NA	NA	NA	NA	NA	NA	NA	NA	NA	NA	NA	NA
470	1	0	85	Sweden	NA	NA	3/14/2020	NA	NA	NA	NA	NA	3/14/2020	NA	NA	NA	NA	NA	NA	NA	NA	NA	NA	NA	NA	NA	NA	NA	NA	NA	NA	NA	NA	NA	NA	NA	NA	NA	NA	NA	NA	NA	NA	NA	NA	NA	NA	NA	NA
471	1	0	74	Switzerland	NA	NA	3/5/2020	NA	NA	NA	NA	NA	3/5/2020	NA	NA	NA	NA	NA	NA	NA	NA	NA	NA	NA	NA	NA	NA	NA	NA	NA	NA	NA	NA	NA	NA	NA	NA	NA	NA	NA	NA	NA	NA	NA	NA	NA	NA	NA	NA
472	1	1	76	Switzerland	NA	NA	3/8/2020	NA	NA	NA	NA	NA	3/8/2020	NA	NA	NA	NA	NA	NA	NA	NA	NA	NA	NA	NA	NA	NA	NA	NA	NA	NA	NA	NA	NA	NA	NA	NA	NA	NA	NA	NA	NA	NA	NA	NA	NA	NA	NA	NA
473	1	0	80	Switzerland	NA	NA	3/10/2020	NA	NA	NA	NA	NA	3/10/2020	NA	NA	NA	NA	NA	NA	NA	NA	NA	NA	NA	NA	NA	NA	NA	NA	NA	NA	NA	NA	NA	NA	NA	NA	NA	NA	NA	NA	NA	NA	NA	NA	NA	NA	NA	NA
474	1	1	54	Switzerland	NA	NA	3/11/2020	NA	NA	NA	NA	NA	3/11/2020	NA	NA	NA	NA	NA	NA	NA	NA	NA	NA	NA	NA	NA	NA	NA	NA	NA	NA	NA	NA	NA	NA	NA	NA	NA	NA	NA	NA	NA	NA	NA	NA	NA	NA	NA	NA
475	1	1	39	The United Kingdom	NA	NA	3/11/2020	NA	NA	NA	NA	NA	3/11/2020	NA	NA	NA	NA	NA	NA	NA	NA	NA	NA	NA	NA	NA	NA	NA	NA	NA	NA	NA	NA	NA	NA	NA	NA	NA	NA	NA	NA	NA	NA	NA	NA	NA	NA	NA	NA
476	1	0	55	The United Kingdom	NA	NA	3/13/2020	NA	NA	NA	NA	NA	3/13/2020	NA	NA	NA	NA	NA	NA	NA	NA	NA	NA	NA	NA	NA	NA	NA	NA	NA	NA	NA	NA	NA	NA	NA	NA	NA	NA	NA	NA	NA	NA	NA	NA	NA	NA	NA	NA
477	1	1	59	The United Kingdom	NA	NA	3/14/2020	NA	NA	NA	NA	NA	3/14/2020	NA	NA	NA	NA	NA	NA	NA	NA	NA	NA	NA	NA	NA	NA	NA	NA	NA	NA	NA	NA	NA	NA	NA	NA	NA	NA	NA	NA	NA	NA	NA	NA	NA	NA	NA	NA
478	1	0	63	The United Kingdom	NA	NA	3/15/2020	NA	NA	NA	NA	NA	3/15/2020	NA	NA	NA	NA	NA	NA	NA	NA	NA	NA	NA	NA	NA	NA	NA	NA	NA	NA	NA	NA	NA	NA	NA	NA	NA	NA	NA	NA	NA	NA	NA	NA	NA	NA	NA	NA
479	1	1	69	The United Kingdom	NA	NA	3/16/2020	NA	NA	NA	NA	NA	3/16/2020	NA	NA	NA	NA	NA	NA	NA	NA	NA	NA	NA	NA	NA	NA	NA	NA	NA	NA	NA	NA	NA	NA	NA	NA	NA	NA	NA	NA	NA	NA	NA	NA	NA	NA	NA	NA
480	1	0	73	The United Kingdom	NA	NA	3/17/2020	NA	NA	NA	NA	NA	3/17/2020	NA	NA	NA	NA	NA	NA	NA	NA	NA	NA	NA	NA	NA	NA	NA	NA	NA	NA	NA	NA	NA	NA	NA	NA	NA	NA	NA	NA	NA	NA	NA	NA	NA	NA	NA	NA
481	1	0	21	The United Kingdom	NA	NA	3/19/2020	NA	NA	NA	NA	NA	3/19/2020	NA	NA	NA	NA	NA	NA	NA	NA	NA	NA	NA	NA	NA	NA	NA	NA	NA	NA	NA	NA	NA	NA	NA	NA	NA	NA	NA	NA	NA	NA	NA	NA	NA	NA	NA	NA
482	1	0	48	The United Kingdom	NA	NA	3/20/2020	NA	NA	NA	NA	NA	3/20/2020	NA	NA	NA	NA	NA	NA	NA	NA	NA	NA	NA	NA	NA	NA	NA	NA	NA	NA	NA	NA	NA	NA	NA	NA	NA	NA	NA	NA	NA	NA	NA	NA	NA	NA	NA	NA
483	1	1	84	The United Kingdom	NA	NA	3/22/2020	NA	NA	NA	NA	NA	3/22/2020	NA	NA	NA	NA	NA	NA	NA	NA	NA	NA	NA	NA	NA	NA	NA	NA	NA	NA	NA	NA	NA	NA	NA	NA	NA	NA	NA	NA	NA	NA	NA	NA	NA	NA	NA	NA
484	1	0	90	The United Kingdom	NA	NA	3/22/2020	NA	NA	NA	NA	NA	3/22/2020	NA	NA	NA	NA	NA	NA	NA	NA	NA	NA	NA	NA	NA	NA	NA	NA	NA	NA	NA	NA	NA	NA	NA	NA	NA	NA	NA	NA	NA	NA	NA	NA	NA	NA	NA	NA
485	1	1	61	The United Kingdom	NA	NA	3/23/2020	NA	NA	NA	NA	NA	3/23/2020	NA	NA	NA	NA	NA	NA	NA	NA	NA	NA	NA	NA	NA	NA	NA	NA	NA	NA	NA	NA	NA	NA	NA	NA	NA	NA	NA	NA	NA	NA	NA	NA	NA	NA	NA	NA
486	1	1	86	The United Kingdom	NA	NA	3/24/2020	NA	NA	NA	NA	NA	3/24/2020	NA	NA	NA	NA	NA	NA	NA	NA	NA	NA	NA	NA	NA	NA	NA	NA	NA	NA	NA	NA	NA	NA	NA	NA	NA	NA	NA	NA	NA	NA	NA	NA	NA	NA	NA	NA
487	1	1	19	The United Kingdom	NA	NA	3/24/2020	NA	NA	NA	NA	NA	3/24/2020	NA	NA	NA	NA	NA	NA	NA	NA	NA	NA	NA	NA	NA	NA	NA	NA	NA	NA	NA	NA	NA	NA	NA	NA	NA	NA	NA	NA	NA	NA	NA	NA	NA	NA	NA	NA
488	1	1	47	The United Kingdom	NA	NA	3/24/2020	NA	NA	NA	NA	NA	3/24/2020	NA	NA	NA	NA	NA	NA	NA	NA	NA	NA	NA	NA	NA	NA	NA	NA	NA	NA	NA	NA	NA	NA	NA	NA	NA	NA	NA	NA	NA	NA	NA	NA	NA	NA	NA	NA
489	1	0	82	The United Kingdom	NA	NA	3/24/2020	NA	NA	NA	NA	NA	3/24/2020	NA	NA	NA	NA	NA	NA	NA	NA	NA	NA	NA	NA	NA	NA	NA	NA	NA	NA	NA	NA	NA	NA	NA	NA	NA	NA	NA	NA	NA	NA	NA	NA	NA	NA	NA	NA
490	1	1	76	The United Kingdom	NA	NA	3/25/2020	NA	NA	NA	NA	NA	3/25/2020	NA	NA	NA	NA	NA	NA	NA	NA	NA	NA	NA	NA	NA	NA	NA	NA	NA	NA	NA	NA	NA	NA	NA	NA	NA	NA	NA	NA	NA	NA	NA	NA	NA	NA	NA	NA
491	1	1	63	The United Kingdom	NA	NA	3/25/2020	NA	NA	NA	NA	NA	3/25/2020	NA	NA	NA	NA	NA	NA	NA	NA	NA	NA	NA	NA	NA	NA	NA	NA	NA	NA	NA	NA	NA	NA	NA	NA	NA	NA	NA	NA	NA	NA	NA	NA	NA	NA	NA	NA
492	1	1	61	The United Kingdom	NA	NA	3/25/2020	NA	NA	NA	NA	NA	3/25/2020	NA	NA	NA	NA	NA	NA	NA	NA	NA	NA	NA	NA	NA	NA	NA	NA	NA	NA	NA	NA	NA	NA	NA	NA	NA	NA	NA	NA	NA	NA	NA	NA	NA	NA	NA	NA
493	1	1	38	The United Kingdom	NA	NA	3/25/2020	NA	NA	NA	NA	NA	3/25/2020	NA	NA	NA	NA	NA	NA	NA	NA	NA	NA	NA	NA	NA	NA	NA	NA	NA	NA	NA	NA	NA	NA	NA	NA	NA	NA	NA	NA	NA	NA	NA	NA	NA	NA	NA	NA
494	1	1	66	The United Kingdom	NA	NA	3/26/2020	NA	NA	NA	NA	NA	3/26/2020	NA	NA	NA	NA	NA	NA	NA	NA	NA	NA	NA	NA	NA	NA	NA	NA	NA	NA	NA	NA	NA	NA	NA	NA	NA	NA	NA	NA	NA	NA	NA	NA	NA	NA	NA	NA
495	1	1	38	The United Kingdom	NA	NA	3/26/2020	NA	NA	NA	NA	NA	3/26/2020	NA	NA	NA	NA	NA	NA	NA	NA	NA	NA	NA	NA	NA	NA	NA	NA	NA	NA	NA	NA	NA	NA	NA	NA	NA	NA	NA	NA	NA	NA	NA	NA	NA	NA	NA	NA
496	1	0	74	The United Kingdom	NA	NA	3/27/2020	NA	NA	NA	NA	NA	3/27/2020	NA	NA	NA	NA	NA	NA	NA	NA	NA	NA	NA	NA	NA	NA	NA	NA	NA	NA	NA	NA	NA	NA	NA	NA	NA	NA	NA	NA	NA	NA	NA	NA	NA	NA	NA	NA
497	1	1	30	The United Kingdom	NA	NA	3/27/2020	NA	NA	NA	NA	NA	3/27/2020	NA	NA	NA	NA	NA	NA	NA	NA	NA	NA	NA	NA	NA	NA	NA	NA	NA	NA	NA	NA	NA	NA	NA	NA	NA	NA	NA	NA	NA	NA	NA	NA	NA	NA	NA	NA
498	1	1	55	The United Kingdom	NA	NA	3/28/2020	NA	NA	NA	NA	NA	3/28/2020	NA	NA	NA	NA	NA	NA	NA	NA	NA	NA	NA	NA	NA	NA	NA	NA	NA	NA	NA	NA	NA	NA	NA	NA	NA	NA	NA	NA	NA	NA	NA	NA	NA	NA	NA	NA
499	1	1	56	The United Kingdom	NA	NA	3/28/2020	NA	NA	NA	NA	NA	3/28/2020	NA	NA	NA	NA	NA	NA	NA	NA	NA	NA	NA	NA	NA	NA	NA	NA	NA	NA	NA	NA	NA	NA	NA	NA	NA	NA	NA	NA	NA	NA	NA	NA	NA	NA	NA	NA
500	1	1	57	The United Kingdom	NA	NA	3/29/2020	NA	NA	NA	NA	NA	3/29/2020	NA	NA	NA	NA	NA	NA	NA	NA	NA	NA	NA	NA	NA	NA	NA	NA	NA	NA	NA	NA	NA	NA	NA	NA	NA	NA	NA	NA	NA	NA	NA	NA	NA	NA	NA	NA
501	1	0	48	The United Kingdom	NA	NA	3/29/2020	NA	NA	NA	NA	NA	3/29/2020	NA	NA	NA	NA	NA	NA	NA	NA	NA	NA	NA	NA	NA	NA	NA	NA	NA	NA	NA	NA	NA	NA	NA	NA	NA	NA	NA	NA	NA	NA	NA	NA	NA	NA	NA	NA
502	1	1	55	The United Kingdom	NA	NA	3/29/2020	NA	NA	NA	NA	NA	3/29/2020	NA	NA	NA	NA	NA	NA	NA	NA	NA	NA	NA	NA	NA	NA	NA	NA	NA	NA	NA	NA	NA	NA	NA	NA	NA	NA	NA	NA	NA	NA	NA	NA	NA	NA	NA	NA
503	1	1	60	The United Kingdom	NA	NA	3/30/2020	NA	NA	NA	NA	NA	3/30/2020	NA	NA	NA	NA	NA	NA	NA	NA	NA	NA	NA	NA	NA	NA	NA	NA	NA	NA	NA	NA	NA	NA	NA	NA	NA	NA	NA	NA	NA	NA	NA	NA	NA	NA	NA	NA
504	1	1	56	The United Kingdom	NA	NA	3/30/2020	NA	NA	NA	NA	NA	3/30/2020	NA	NA	NA	NA	NA	NA	NA	NA	NA	NA	NA	NA	NA	NA	NA	NA	NA	NA	NA	NA	NA	NA	NA	NA	NA	NA	NA	NA	NA	NA	NA	NA	NA	NA	NA	NA
505	1	1	69	The United Kingdom	NA	NA	3/31/2020	NA	NA	NA	NA	NA	3/31/2020	NA	NA	NA	NA	NA	NA	NA	NA	NA	NA	NA	NA	NA	NA	NA	NA	NA	NA	NA	NA	NA	NA	NA	NA	NA	NA	NA	NA	NA	NA	NA	NA	NA	NA	NA	NA
506	1	1	68	The United Kingdom	NA	NA	3/31/2020	NA	NA	NA	NA	NA	3/31/2020	NA	NA	NA	NA	NA	NA	NA	NA	NA	NA	NA	NA	NA	NA	NA	NA	NA	NA	NA	NA	NA	NA	NA	NA	NA	NA	NA	NA	NA	NA	NA	NA	NA	NA	NA	NA
507	1	1	13	The United Kingdom	NA	NA	3/31/2020	NA	NA	NA	NA	NA	3/31/2020	NA	NA	NA	NA	NA	NA	NA	NA	NA	NA	NA	NA	NA	NA	NA	NA	NA	NA	NA	NA	NA	NA	NA	NA	NA	NA	NA	NA	NA	NA	NA	NA	NA	NA	NA	NA
508	1	1	13	The United Kingdom	NA	NA	3/31/2020	NA	NA	NA	NA	NA	3/31/2020	NA	NA	NA	NA	NA	NA	NA	NA	NA	NA	NA	NA	NA	NA	NA	NA	NA	NA	NA	NA	NA	NA	NA	NA	NA	NA	NA	NA	NA	NA	NA	NA	NA	NA	NA	NA
509	1	1	97	The United Kingdom	NA	NA	3/31/2020	NA	NA	NA	NA	NA	3/31/2020	NA	NA	NA	NA	NA	NA	NA	NA	NA	NA	NA	NA	NA	NA	NA	NA	NA	NA	NA	NA	NA	NA	NA	NA	NA	NA	NA	NA	NA	NA	NA	NA	NA	NA	NA	NA
510	1	1	77	Trinidad and Tobago	NA	NA	3/25/2020	NA	NA	NA	NA	NA	3/25/2020	NA	NA	NA	NA	NA	NA	NA	NA	NA	NA	NA	NA	NA	NA	NA	NA	NA	NA	NA	NA	NA	NA	NA	NA	NA	NA	NA	NA	NA	NA	NA	NA	NA	NA	NA	NA
511	1	1	80	Trinidad and Tobago	NA	NA	3/26/2020	NA	NA	NA	NA	NA	3/26/2020	NA	NA	NA	NA	NA	NA	NA	NA	NA	NA	NA	NA	NA	NA	NA	NA	NA	NA	NA	NA	NA	NA	NA	NA	NA	NA	NA	NA	NA	NA	NA	NA	NA	NA	NA	NA
512	1	1	79	Turkey	NA	NA	3/15/2020	NA	NA	NA	NA	NA	3/15/2020	NA	NA	NA	NA	NA	NA	NA	NA	NA	NA	NA	NA	NA	NA	NA	NA	NA	NA	NA	NA	NA	NA	NA	NA	NA	NA	NA	NA	NA	NA	NA	NA	NA	NA	NA	NA
513	1	1	61	Turkey	NA	NA	3/18/2020	NA	NA	NA	NA	NA	3/18/2020	NA	NA	NA	NA	NA	NA	NA	NA	NA	NA	NA	NA	NA	NA	NA	NA	NA	NA	NA	NA	NA	NA	NA	NA	NA	NA	NA	NA	NA	NA	NA	NA	NA	NA	NA	NA
514	1	0	85	Turkey	NA	NA	3/19/2020	NA	NA	NA	NA	NA	3/19/2020	NA	NA	NA	NA	NA	NA	NA	NA	NA	NA	NA	NA	NA	NA	NA	NA	NA	NA	NA	NA	NA	NA	NA	NA	NA	NA	NA	NA	NA	NA	NA	NA	NA	NA	NA	NA
515	1	0	71	Ukraine	NA	NA	3/13/2020	NA	NA	NA	NA	NA	3/13/2020	NA	NA	NA	NA	NA	NA	NA	NA	NA	NA	NA	NA	NA	NA	NA	NA	NA	NA	NA	NA	NA	NA	NA	NA	NA	NA	NA	NA	NA	NA	NA	NA	NA	NA	NA	NA
516	1	0	33	Ukraine	NA	NA	3/17/2020	NA	NA	NA	NA	NA	3/17/2020	NA	NA	NA	NA	NA	NA	NA	NA	NA	NA	NA	NA	NA	NA	NA	NA	NA	NA	NA	NA	NA	NA	NA	NA	NA	NA	NA	NA	NA	NA	NA	NA	NA	NA	NA	NA
517	1	1	80	America	NA	NA	NA	NA	NA	NA	0	0	before 2020/5/1	1	1	1	0	0	0	0	0	0	0	0	1	0	0	0	0	0	0	0	0	0	0	NA	NA	NA	NA	NA	NA	NA	1	0	1	0	0	0	0
518	1	0	58	America	NA	NA	NA	1	2	2	NA	NA	before 2020/7/22	1	1	0	0	0	0	0	0	0	0	0	1	1	0	1	0	0	0	0	0	0	0	1	NA	NA	NA	NA	NA	NA	1	0	0	0	1	0	0
519	1	1	79	Italy	NA	NA	NA	NA	53	NA	0	0	before 2020/8/6	1	0	1	1	0	0	0	0	0	0	0	1	1	1	1	0	0	0	0	0	0	0	NA	NA	NA	NA	NA	NA	NA	1	0	0	1	0	0	0
520	1	1	80	Spain	NA	NA	NA	NA	NA	NA	1	0	2020/3/15-2020/4/30	1	0	1	1	0	1	0	1	0	0	0	1	1	1	0	0	0	0	0	0	0	0	NA	NA	NA	NA	NA	NA	NA	0	0	0	0	0	0	0
521	1	0	82	Spain	NA	NA	NA	NA	NA	NA	1	0	2020/3/15-2020/4/30	1	0	1	1	0	0	0	1	0	0	0	1	1	1	0	0	0	0	0	0	0	0	NA	NA	NA	NA	NA	NA	NA	1	0	0	0	1	0	0
522	1	1	44	Spain	NA	NA	NA	NA	NA	NA	1	0	2020/3/15-2020/4/30	0	0	0	0	0	0	0	0	0	0	0	1	1	1	0	0	0	0	0	0	0	0	NA	NA	NA	NA	NA	NA	NA	0	0	0	0	0	0	0
523	1	1	72	Spain	NA	NA	NA	NA	NA	NA	1	0	2020/3/15-2020/4/30	1	0	1	0	0	0	0	0	0	0	0	1	1	1	0	0	0	0	0	0	0	0	NA	NA	NA	NA	NA	NA	NA	0	0	0	0	0	0	0
524	1	1	60	Spain	NA	NA	NA	NA	NA	NA	1	0	2020/3/15-2020/4/30	1	0	0	0	0	0	0	1	0	0	0	1	1	1	0	0	0	0	0	0	0	0	NA	NA	NA	NA	NA	NA	NA	0	0	0	0	0	0	0
525	1	1	67	Spain	NA	NA	NA	NA	NA	NA	1	0	2020/3/15-2020/4/30	1	0	0	1	0	0	0	0	0	0	0	1	1	1	0	0	0	0	0	0	0	0	NA	NA	NA	NA	NA	NA	NA	0	0	0	0	0	0	0
526	1	1	71	Spain	NA	NA	NA	NA	NA	NA	1	0	2020/3/15-2020/4/30	1	0	0	1	0	0	0	0	0	0	0	1	1	1	0	0	0	0	0	0	0	0	NA	NA	NA	NA	NA	NA	NA	1	0	0	0	1	0	0
527	1	1	88	Spain	NA	NA	NA	NA	NA	NA	1	0	2020/3/15-2020/4/30	1	0	1	1	0	0	0	0	0	0	0	1	0	0	0	0	0	0	0	0	0	0	NA	NA	NA	NA	NA	NA	NA	0	0	0	0	0	0	0
528	1	1	71	Spain	NA	NA	NA	NA	NA	NA	1	0	2020/3/15-2020/4/30	1	0	0	1	0	0	0	0	0	0	0	1	1	1	0	0	0	1	0	0	0	0	NA	NA	NA	NA	NA	NA	NA	0	0	0	0	0	0	0
529	1	1	86	Spain	NA	NA	NA	NA	NA	NA	1	0	2020/3/15-2020/4/30	1	0	0	1	0	0	0	1	0	0	0	1	0	0	0	0	0	0	0	0	0	0	NA	NA	NA	NA	NA	NA	NA	0	0	0	0	0	0	0
530	1	0	84	Spain	NA	NA	NA	NA	NA	NA	1	0	2020/3/15-2020/4/30	1	0	0	1	0	0	0	0	0	0	0	1	0	0	0	0	0	0	0	0	0	0	NA	NA	NA	NA	NA	NA	NA	0	0	0	0	0	0	0
531	1	1	84	Spain	NA	NA	NA	NA	NA	NA	1	0	2020/3/15-2020/4/30	1	0	0	1	0	0	0	0	0	0	0	1	1	1	0	0	0	1	0	0	0	0	NA	NA	NA	NA	NA	NA	NA	0	0	0	0	0	0	0
532	1	1	91	Spain	NA	NA	NA	NA	NA	NA	1	0	2020/3/15-2020/4/30	1	0	1	1	0	0	0	0	0	0	0	1	1	0	0	0	0	0	0	0	0	0	NA	NA	NA	NA	NA	NA	NA	0	0	0	0	0	0	0
533	1	1	72	Spain	NA	NA	NA	NA	NA	NA	1	0	2020/3/15-2020/4/30	1	0	0	1	0	0	0	0	0	0	0	1	1	1	0	0	0	0	0	0	0	0	NA	NA	NA	NA	NA	NA	NA	1	0	0	0	1	0	0
534	1	1	89	Spain	NA	NA	NA	NA	NA	NA	1	0	2020/3/15-2020/4/30	1	0	0	1	0	0	0	0	0	0	0	1	0	0	0	0	0	0	0	0	0	0	NA	NA	NA	NA	NA	NA	NA	0	0	0	0	0	0	0
535	1	0	91	Spain	NA	NA	NA	NA	NA	NA	1	0	2020/3/15-2020/4/30	1	0	1	1	0	0	0	0	0	0	0	1	0	1	0	0	0	0	0	0	0	0	NA	NA	NA	NA	NA	NA	NA	1	0	0	0	1	0	0
536	1	1	82	Spain	NA	NA	NA	NA	NA	NA	1	0	2020/3/15-2020/4/30	1	0	1	1	0	0	0	0	0	0	0	1	1	0	0	0	0	0	0	0	0	0	NA	NA	NA	NA	NA	NA	NA	0	0	0	0	0	0	0
537	1	1	92	Spain	NA	NA	NA	NA	NA	NA	1	0	2020/3/15-2020/4/30	1	0	1	1	0	0	0	0	0	0	0	1	1	0	0	0	0	1	0	0	0	0	NA	NA	NA	NA	NA	NA	NA	1	0	0	0	1	0	0
538	1	1	36	Spain	NA	NA	NA	NA	NA	NA	1	0	2020/3/15-2020/4/30	1	0	0	0	0	0	0	1	0	0	0	1	1	1	0	0	0	1	0	0	0	0	NA	NA	NA	NA	NA	NA	NA	1	0	0	0	1	0	0
539	1	1	71	Spain	NA	NA	NA	NA	NA	NA	0	0	before 2020/6/30	1	1	0	0	0	0	0	0	0	0	0	1	0	0	0	0	0	0	0	0	0	0	NA	NA	NA	NA	NA	NA	NA	1	0	0	0	0	0	0
540	1	1	63	Spain	NA	NA	NA	NA	NA	NA	0	0	before 2020/6/30	0	0	0	0	0	0	0	0	0	0	0	1	0	0	0	0	0	0	0	0	0	0	NA	NA	NA	NA	NA	NA	NA	NA	NA	NA	NA	NA	NA	NA
541	1	1	72	Italy	NA	NA	NA	NA	NA	43	0	1	before 2020/3/27	1	0	1	1	0	0	0	1	0	0	0	NA	NA	NA	NA	NA	NA	NA	NA	NA	NA	NA	NA	NA	NA	NA	NA	NA	NA	1	0	0	0	1	0	0
542	0	0	51	America	2020-03-22	2020-03-22	2020-04-06	1	16	16	NA	NA	before 2020/4/15	1	1	1	0	0	0	0	0	0	0	0	1	0	0	1	0	0	0	0	0	0	0	1	0	0	0	0	0	0	NA	NA	NA	NA	NA	NA	NA
543	0	0	56	America	NA	NA	NA	14	21	35	0	0	before 2020/4/9	1	1	0	0	0	0	0	0	0	0	0	1	1	1	0	0	1	0	0	0	0	0	NA	NA	NA	NA	NA	NA	NA	1	0	0	0	1	0	0
544	0	1	72	Austria	2020-02-17	2020-02-17	2020-03-27	1	40	40	0	0	2020-03-27	1	0	0	0	0	0	0	0	0	0	0	1	1	0	1	0	0	1	0	0	0	0	NA	NA	NA	NA	NA	NA	NA	NA	NA	NA	NA	NA	NA	NA
545	0	1	32	Netherlands	NA	NA	NA	8	17	25	NA	NA	2020/3/23-2020/4/25	1	0	0	0	0	0	0	0	0	0	0	1	1	1	1	0	0	0	0	0	0	0	1	0	0	0	0	0	0	NA	NA	NA	NA	NA	NA	NA
546	0	1	48	America	2020-02-22	2020-02-27	2020-03-10	6	13	18	NA	NA	before 2020/3/10	NA	NA	NA	NA	NA	NA	NA	NA	NA	NA	NA	1	0	0	1	0	0	0	0	0	0	0	NA	NA	NA	NA	NA	NA	NA	NA	NA	NA	NA	NA	NA	NA
547	0	0	60	America	2020-03-27	2020-03-27	2020-04-09	1	14	14	NA	NA	2020-04-09	NA	NA	NA	NA	NA	NA	NA	NA	NA	NA	NA	1	1	1	1	0	0	0	0	0	0	0	NA	NA	NA	NA	NA	NA	NA	NA	NA	NA	NA	NA	NA	NA
548	0	1	57	America	NA	NA	NA	14	8	22	0	0	before 2020/4/20	NA	NA	NA	NA	NA	NA	NA	NA	NA	NA	NA	1	1	1	1	0	1	0	0	1	0	0	1	0	0	0	0	0	0	NA	NA	NA	NA	NA	NA	NA
549	0	1	58	Cyprus	2020-03-20	2020-03-23	2020-04-23	4	32	35	0	0	before 2020/4/23	NA	NA	NA	NA	NA	NA	NA	NA	NA	NA	NA	1	1	1	1	0	0	0	0	0	0	0	1	0	0	0	0	0	0	1	0	0	0	1	0	0
550	0	0	30	France	2020-01-23	2020-01-24	2020-02-12	2	20	21	0	0	before 2020/3/27	NA	NA	NA	NA	NA	NA	NA	NA	NA	NA	NA	1	0	1	0	0	0	0	0	0	0	0	NA	NA	NA	NA	NA	NA	NA	NA	NA	NA	NA	NA	NA	NA
551	0	0	46	France	2020-01-28	2020-01-29	2020-02-17	2	20	21	0	0	before 2020/3/27	NA	NA	NA	NA	NA	NA	NA	NA	NA	NA	NA	1	0	1	0	0	0	0	0	0	0	0	NA	NA	NA	NA	NA	NA	NA	NA	NA	NA	NA	NA	NA	NA
552	0	1	21	Netherlands	NA	NA	NA	10	6	16	NA	NA	2020/3/23-2020/4/25	NA	NA	NA	NA	NA	NA	NA	NA	NA	NA	NA	1	1	1	0	0	0	0	0	0	1	0	1	0	0	0	0	0	0	NA	NA	NA	NA	NA	NA	NA
553	0	1	29	Spain	2020-03-05	2020-03-11	2020-03-23	7	13	19	NA	NA	before 2020/4/3	NA	NA	NA	NA	NA	NA	NA	NA	NA	NA	NA	1	1	0	1	0	0	1	0	0	0	0	1	0	0	0	0	0	0	NA	NA	NA	NA	NA	NA	NA
554	0	1	48	America	NA	NA	NA	8	NA	NA	0	0	before 2020/4/16	1	0	0	0	0	0	0	0	0	0	0	1	1	1	0	1	0	0	0	0	0	0	1	0	0	0	0	0	0	NA	NA	NA	NA	NA	NA	NA
555	0	1	74	France	NA	2020-04-03	2020-04-20	NA	18	NA	0	0	2020-04-20	1	0	0	1	1	0	0	0	0	0	0	1	1	0	0	0	0	0	0	0	0	0	NA	NA	NA	NA	NA	NA	NA	NA	NA	NA	NA	NA	NA	NA
556	0	0	86	France	NA	NA	NA	NA	NA	NA	NA	NA	2020/3/20-2020/3/31	1	0	0	0	0	0	0	0	0	1	0	0	0	0	0	0	0	0	0	0	0	0	1	0	0	0	0	0	0	NA	NA	NA	NA	NA	NA	NA
557	0	1	58	France	NA	NA	NA	NA	NA	NA	NA	NA	2020/3/20-2020/3/31	1	0	0	0	0	0	0	1	0	0	0	0	0	0	0	0	0	0	0	0	0	0	1	0	0	0	0	0	0	NA	NA	NA	NA	NA	NA	NA
558	0	1	55	France	NA	NA	NA	NA	NA	60	NA	NA	2020/3/20-2020/3/31	1	0	0	0	0	0	0	1	0	0	0	1	1	0	0	0	0	0	0	0	0	0	NA	NA	NA	NA	NA	NA	NA	NA	NA	NA	NA	NA	NA	NA
559	0	1	54	France	NA	NA	NA	NA	NA	NA	0	0	2020/3/19-2020/4/19	1	1	1	0	0	0	0	0	0	0	0	1	0	1	0	0	0	0	0	0	0	0	NA	NA	NA	NA	NA	NA	NA	NA	NA	NA	NA	NA	NA	NA
560	0	1	42	France	NA	NA	NA	NA	NA	NA	0	0	before 2020/4/14	1	0	1	0	0	0	0	0	0	0	0	1	1	1	0	0	0	0	0	1	0	0	NA	NA	NA	NA	NA	NA	NA	NA	NA	NA	NA	NA	NA	NA
561	0	1	67	Greece	NA	NA	NA	NA	NA	NA	0	0	before 2020/4/12	1	1	0	1	0	0	0	0	0	0	0	1	1	0	0	0	0	0	0	0	0	0	NA	NA	NA	NA	NA	NA	NA	NA	NA	NA	NA	NA	NA	NA
562	0	1	56	Greece	NA	NA	NA	NA	NA	NA	0	0	before 2020/4/12	1	1	0	0	0	0	0	0	0	0	0	1	1	0	0	0	0	0	0	0	0	0	NA	NA	NA	NA	NA	NA	NA	NA	NA	NA	NA	NA	NA	NA
563	0	1	68	Greece	NA	NA	NA	NA	NA	NA	0	0	before 2020/4/12	1	1	1	1	0	0	0	0	0	0	0	1	1	0	0	0	0	0	0	0	0	0	NA	NA	NA	NA	NA	NA	NA	NA	NA	NA	NA	NA	NA	NA
564	0	1	67	Greece	NA	NA	NA	NA	NA	NA	0	0	before 2020/4/12	1	1	1	1	0	0	0	0	0	0	0	1	1	0	0	0	0	0	0	0	0	0	NA	NA	NA	NA	NA	NA	NA	NA	NA	NA	NA	NA	NA	NA
565	0	0	71	Italy	NA	NA	NA	NA	NA	15	0	0	before 2020/3/27	1	1	0	0	0	0	0	0	0	0	0	1	1	0	1	0	0	0	0	0	0	0	1	0	0	0	0	0	0	1	0	0	0	1	0	0
566	0	1	71	Italy	NA	NA	NA	NA	NA	22	0	0	before 2020/3/27	1	1	0	0	0	0	0	0	0	0	0	1	0	0	0	0	0	0	1	0	0	0	NA	NA	NA	NA	NA	NA	NA	NA	NA	NA	NA	NA	NA	NA
567	0	1	69	Italy	NA	NA	NA	NA	NA	35	0	0	before 2020/3/27	1	1	1	1	0	0	0	0	0	0	0	1	1	0	1	0	0	0	0	0	0	0	1	0	0	0	0	0	0	1	0	0	0	1	0	0
568	0	1	64	Italy	NA	NA	NA	NA	NA	41	0	0	before 2020/3/27	1	0	0	1	0	0	0	0	0	0	0	1	1	0	1	0	0	0	0	0	0	0	1	0	0	0	0	0	0	1	0	0	0	1	0	0
569	0	0	70	Italy	NA	NA	NA	NA	NA	16	0	0	before 2020/3/27	1	1	0	0	0	0	0	0	0	0	0	1	1	1	0	0	1	0	0	0	0	0	1	0	0	0	0	0	0	NA	NA	NA	NA	NA	NA	NA
570	0	0	63	Italy	NA	NA	NA	NA	NA	14	0	0	before 2020/3/27	1	1	0	0	0	0	0	0	0	0	0	1	1	1	0	0	0	0	0	0	0	0	1	0	0	0	0	0	0	NA	NA	NA	NA	NA	NA	NA
571	0	1	56	Italy	NA	NA	NA	NA	NA	6	0	0	before 2020/3/27	1	0	0	0	0	0	0	0	0	0	0	1	1	0	0	0	0	0	0	0	0	0	NA	NA	NA	NA	NA	NA	NA	NA	NA	NA	NA	NA	NA	NA
572	0	0	36	Italy	NA	NA	NA	NA	NA	10	0	0	before 2020/3/27	1	0	0	0	0	0	0	0	0	0	0	1	0	1	0	0	0	0	0	0	0	0	NA	NA	NA	NA	NA	NA	NA	NA	NA	NA	NA	NA	NA	NA
573	0	1	80	Italy	NA	NA	NA	NA	NA	50	0	0	before 2020/3/27	1	1	0	1	0	0	0	0	0	0	0	1	0	0	0	0	0	0	0	0	0	0	1	0	0	0	0	0	1	1	0	0	0	1	0	0
574	0	0	60	Italy	NA	NA	NA	NA	NA	NA	0	0	before 2020/3/27	1	1	0	0	0	0	0	0	0	0	0	1	0	1	0	0	0	0	0	0	0	0	NA	NA	NA	NA	NA	NA	NA	NA	NA	NA	NA	NA	NA	NA
575	0	0	70	Italy	NA	NA	NA	NA	NA	24	0	0	before 2020/3/27	1	0	0	0	0	0	0	1	0	0	0	1	1	1	0	0	1	0	0	0	0	0	1	0	0	0	0	0	0	1	0	0	0	1	0	0
576	0	1	74	Italy	NA	NA	NA	NA	NA	19	0	0	before 2020/3/27	1	1	0	0	0	0	0	0	0	0	0	1	1	1	0	0	0	0	0	0	0	0	NA	NA	NA	NA	NA	NA	NA	1	1	0	0	0	0	0
577	0	1	72	Italy	NA	NA	NA	NA	NA	50	0	0	before 2020/3/27	1	0	0	1	0	0	0	0	0	0	0	1	1	0	0	0	0	0	0	0	0	0	1	0	0	0	0	0	0	1	0	0	0	1	0	0
578	0	1	79	Italy	NA	NA	NA	NA	NA	NA	0	0	before 2020/3/27	1	1	1	0	0	0	0	1	0	1	0	1	0	0	0	1	0	0	0	0	0	0	0	0	0	0	0	0	1	1	1	0	0	0	0	0
579	0	0	48	Italy	NA	NA	NA	NA	NA	18	0	0	before 2020/3/27	1	0	0	0	0	0	0	0	0	0	0	1	0	1	0	0	0	0	0	0	0	0	NA	NA	NA	NA	NA	NA	NA	NA	NA	NA	NA	NA	NA	NA
580	0	0	71	Netherlands	NA	NA	NA	NA	NA	NA	0	0	before 2020/4/12	1	1	0	1	0	0	0	1	0	0	0	1	1	0	0	0	0	0	0	0	0	0	1	0	0	0	0	0	0	NA	NA	NA	NA	NA	NA	NA
581	0	1	23	Netherlands	NA	NA	NA	NA	NA	NA	NA	NA	2020/3/23-2020/4/25	1	0	0	0	0	0	0	0	0	0	0	1	1	1	1	0	1	0	0	0	1	0	1	0	0	0	0	0	0	NA	NA	NA	NA	NA	NA	NA
582	0	0	61	Spain	NA	NA	NA	NA	NA	NA	0	0	2020/3/15-2020/4/30	1	0	0	0	0	0	0	1	0	0	0	1	1	1	1	0	0	1	0	0	0	0	NA	NA	NA	NA	NA	NA	NA	0	0	0	0	0	0	0
583	0	1	68	Spain	NA	NA	NA	NA	NA	NA	0	0	2020/3/15-2020/4/30	1	0	0	1	0	0	0	0	0	0	0	1	1	1	1	0	0	0	0	0	0	0	NA	NA	NA	NA	NA	NA	NA	0	0	0	0	0	0	0
584	0	1	10	Spain	NA	NA	NA	NA	NA	NA	0	0	2020/3/15-2020/4/30	0	0	0	0	0	0	0	0	0	0	0	1	0	0	0	0	0	0	1	0	0	0	NA	NA	NA	NA	NA	NA	NA	0	0	0	0	0	0	0
585	0	1	24	Spain	NA	NA	NA	NA	NA	NA	0	0	2020/3/15-2020/4/30	1	0	1	0	0	0	0	0	0	0	0	1	1	0	1	0	0	0	0	0	0	0	NA	NA	NA	NA	NA	NA	NA	0	0	0	0	0	0	0
586	0	1	71	Spain	NA	NA	NA	NA	NA	NA	0	0	2020/3/15-2020/4/30	1	0	1	1	0	0	0	0	0	0	0	1	1	0	1	0	0	0	1	0	0	0	NA	NA	NA	NA	NA	NA	NA	0	0	0	0	0	0	0
587	0	0	48	Spain	NA	NA	NA	NA	NA	NA	0	0	2020/3/15-2020/4/30	1	0	0	1	0	0	0	0	0	0	0	1	1	1	0	0	0	1	0	0	0	0	NA	NA	NA	NA	NA	NA	NA	0	0	0	0	0	0	0
588	0	1	88	Spain	NA	NA	NA	NA	NA	NA	0	0	2020/3/15-2020/4/30	1	0	0	1	0	0	0	0	0	0	0	0	0	0	0	0	0	0	0	0	0	0	NA	NA	NA	NA	NA	NA	NA	0	0	0	0	0	0	0
589	0	1	22	Spain	NA	NA	NA	NA	NA	NA	0	0	2020/3/15-2020/4/30	0	0	0	0	0	0	0	0	0	0	0	1	1	1	1	0	0	1	0	0	0	0	NA	NA	NA	NA	NA	NA	NA	0	0	0	0	0	0	0
590	0	1	59	Spain	NA	NA	NA	NA	NA	NA	0	0	2020/3/15-2020/4/30	1	0	0	0	0	1	0	1	0	0	0	1	1	1	1	0	0	0	0	0	0	0	NA	NA	NA	NA	NA	NA	NA	0	0	0	0	0	0	0
591	0	1	53	Spain	NA	NA	NA	NA	NA	NA	0	0	2020/3/15-2020/4/30	0	0	0	0	0	0	0	0	0	0	0	1	1	1	1	0	0	0	0	0	0	0	NA	NA	NA	NA	NA	NA	NA	0	0	0	0	0	0	0
592	0	1	67	Spain	NA	NA	NA	NA	NA	NA	0	0	2020/3/15-2020/4/30	1	0	1	1	0	0	0	0	0	0	0	1	0	0	0	0	0	0	1	0	0	0	NA	NA	NA	NA	NA	NA	NA	0	0	0	0	0	0	0
593	0	1	56	Spain	NA	NA	NA	NA	NA	NA	0	0	2020/3/15-2020/4/30	0	0	0	0	0	0	0	0	0	0	0	1	1	1	1	0	0	1	1	0	0	0	NA	NA	NA	NA	NA	NA	NA	0	0	0	0	0	0	0
594	0	1	59	Spain	NA	NA	NA	NA	NA	NA	0	0	2020/3/15-2020/4/30	1	0	1	0	0	0	0	0	0	0	0	1	1	1	0	0	0	1	0	0	0	0	NA	NA	NA	NA	NA	NA	NA	0	0	0	0	0	0	0
595	0	0	81	Spain	NA	NA	NA	NA	NA	NA	0	0	2020/3/15-2020/4/30	1	0	0	1	0	0	0	0	0	0	0	1	1	1	0	0	0	0	0	0	0	0	NA	NA	NA	NA	NA	NA	NA	0	0	0	0	0	0	0
596	0	1	59	Spain	NA	NA	NA	NA	NA	NA	0	0	2020/3/15-2020/4/30	0	0	0	0	0	0	0	0	0	0	0	1	1	1	1	0	0	0	0	0	0	0	NA	NA	NA	NA	NA	NA	NA	0	0	0	0	0	0	0
597	0	1	59	Spain	NA	NA	NA	NA	NA	NA	0	0	2020/3/15-2020/4/30	1	0	0	1	0	0	0	0	0	0	0	1	1	1	1	0	0	0	0	0	0	0	NA	NA	NA	NA	NA	NA	NA	0	0	0	0	0	0	0
598	0	0	30	Spain	NA	NA	NA	NA	NA	NA	0	0	2020/3/15-2020/4/30	0	0	0	0	0	0	0	0	0	0	0	0	0	0	0	0	0	0	0	0	0	0	NA	NA	NA	NA	NA	NA	NA	0	0	0	0	0	0	0
599	0	0	30	Spain	NA	NA	NA	NA	NA	NA	0	0	2020/3/15-2020/4/30	0	0	0	0	0	0	0	0	0	0	0	0	0	0	0	0	0	0	0	0	0	0	NA	NA	NA	NA	NA	NA	NA	0	0	0	0	0	0	0
600	0	1	79	Spain	NA	NA	NA	NA	NA	NA	0	0	2020/3/15-2020/4/30	1	0	0	1	0	0	0	0	0	0	0	0	0	0	0	0	0	0	0	0	0	0	NA	NA	NA	NA	NA	NA	NA	0	0	0	0	0	0	0
601	0	1	57	Spain	NA	NA	NA	NA	NA	NA	0	0	2020/3/15-2020/4/30	1	0	0	1	0	0	0	0	0	0	0	1	1	0	1	0	0	0	0	0	0	0	NA	NA	NA	NA	NA	NA	NA	0	0	0	0	0	0	0
602	0	1	59	Spain	NA	NA	NA	NA	NA	NA	0	0	2020/3/15-2020/4/30	0	0	0	0	0	0	0	0	0	0	0	1	1	1	1	0	0	0	0	0	0	0	NA	NA	NA	NA	NA	NA	NA	0	0	0	0	0	0	0
603	0	0	80	Spain	NA	NA	NA	NA	NA	NA	0	0	2020/3/15-2020/4/30	1	0	0	1	0	0	0	0	0	0	0	1	0	1	0	0	0	0	1	0	0	0	NA	NA	NA	NA	NA	NA	NA	0	0	0	0	0	0	0
604	0	1	62	Spain	NA	NA	NA	NA	NA	NA	0	0	2020/3/15-2020/4/30	0	0	0	0	0	0	0	0	0	0	0	1	1	0	0	0	0	0	1	0	0	0	NA	NA	NA	NA	NA	NA	NA	0	0	0	0	0	0	0
605	0	1	64	Spain	NA	NA	NA	NA	NA	NA	0	0	2020/3/15-2020/4/30	1	0	1	1	0	0	0	0	0	0	0	1	0	0	1	0	0	0	0	0	0	0	NA	NA	NA	NA	NA	NA	NA	0	0	0	0	0	0	0
606	0	0	86	Spain	NA	NA	NA	NA	NA	NA	0	0	2020/3/15-2020/4/30	1	0	0	1	0	0	0	0	0	0	0	1	0	0	1	0	0	0	0	0	0	0	NA	NA	NA	NA	NA	NA	NA	0	0	0	0	0	0	0
607	0	1	52	Spain	NA	NA	NA	NA	NA	NA	0	0	2020/3/15-2020/4/30	0	0	0	0	0	0	0	0	0	0	0	1	1	1	1	0	0	1	0	0	0	0	NA	NA	NA	NA	NA	NA	NA	0	0	0	0	0	0	0
608	0	0	86	Spain	NA	NA	NA	NA	NA	NA	0	0	2020/3/15-2020/4/30	1	0	1	1	0	0	0	0	0	0	0	0	0	0	0	0	0	0	0	0	0	0	NA	NA	NA	NA	NA	NA	NA	0	0	0	0	0	0	0
609	0	1	56	Spain	NA	NA	NA	NA	NA	NA	0	0	2020/3/15-2020/4/30	1	0	0	1	0	0	0	1	0	0	0	1	1	1	1	0	0	1	0	0	0	0	NA	NA	NA	NA	NA	NA	NA	0	0	0	0	0	0	0
610	0	0	45	Spain	NA	NA	NA	NA	NA	NA	0	0	2020/3/15-2020/4/30	0	0	0	0	0	0	0	0	0	0	0	1	1	1	0	0	0	0	0	0	0	0	NA	NA	NA	NA	NA	NA	NA	0	0	0	0	0	0	0
611	0	1	71	Spain	NA	NA	NA	NA	NA	NA	0	0	2020/3/15-2020/4/30	0	0	0	0	0	0	0	0	0	0	0	1	1	1	1	0	0	0	1	0	0	0	NA	NA	NA	NA	NA	NA	NA	0	0	0	0	0	0	0
612	0	0	69	Spain	NA	NA	NA	NA	NA	NA	0	0	2020/3/15-2020/4/30	1	0	0	1	0	0	0	0	0	0	0	1	0	0	1	0	0	0	0	0	0	0	NA	NA	NA	NA	NA	NA	NA	0	0	0	0	0	0	0
613	0	1	51	Spain	NA	NA	NA	NA	NA	NA	0	0	2020/3/15-2020/4/30	0	0	0	0	0	0	0	0	0	0	0	1	1	1	1	0	0	1	0	0	0	0	NA	NA	NA	NA	NA	NA	NA	0	0	0	0	0	0	0
614	0	0	58	Spain	NA	NA	NA	NA	NA	NA	0	0	2020/3/15-2020/4/30	1	0	0	1	0	0	0	0	0	0	0	1	1	1	1	0	0	0	1	0	0	0	NA	NA	NA	NA	NA	NA	NA	0	0	0	0	0	0	0
615	0	1	87	Spain	NA	NA	NA	NA	NA	NA	0	0	2020/3/15-2020/4/30	1	0	0	1	0	0	0	0	0	0	0	1	1	0	1	0	0	0	0	0	0	0	NA	NA	NA	NA	NA	NA	NA	0	0	0	0	0	0	0
616	0	0	57	Spain	NA	NA	NA	NA	NA	NA	0	0	2020/3/15-2020/4/30	0	0	0	0	0	0	0	0	0	0	0	1	1	1	1	0	0	1	0	0	0	0	NA	NA	NA	NA	NA	NA	NA	0	0	0	0	0	0	0
617	0	0	59	Spain	NA	NA	NA	NA	NA	NA	0	0	2020/3/15-2020/4/30	0	0	0	0	0	0	0	0	0	0	0	1	1	1	1	0	0	1	0	0	0	0	NA	NA	NA	NA	NA	NA	NA	0	0	0	0	0	0	0
618	0	1	62	Spain	NA	NA	NA	NA	NA	NA	0	0	2020/3/15-2020/4/30	0	0	0	0	0	0	0	0	0	0	0	1	0	1	1	0	0	0	0	0	0	0	NA	NA	NA	NA	NA	NA	NA	0	0	0	0	0	0	0
619	0	0	93	Spain	NA	NA	NA	NA	NA	NA	0	0	2020/3/15-2020/4/30	1	0	0	1	0	0	0	0	0	0	0	0	0	0	0	0	0	0	0	0	0	0	NA	NA	NA	NA	NA	NA	NA	0	0	0	0	0	0	0
620	0	0	16	Spain	NA	NA	NA	NA	NA	NA	0	0	2020/3/15-2020/4/30	0	0	0	0	0	0	0	0	0	0	0	0	0	0	0	0	0	0	0	0	0	0	NA	NA	NA	NA	NA	NA	NA	0	0	0	0	0	0	0
621	0	1	72	Spain	NA	NA	NA	NA	NA	NA	0	0	2020/3/15-2020/4/30	1	0	1	1	0	0	0	1	0	0	0	1	0	0	0	0	0	0	1	0	0	0	NA	NA	NA	NA	NA	NA	NA	0	0	0	0	0	0	0
622	0	0	64	Spain	NA	NA	NA	NA	NA	NA	0	0	2020/3/15-2020/4/30	1	0	0	1	0	0	0	0	0	0	0	1	0	0	1	0	0	0	0	0	0	0	NA	NA	NA	NA	NA	NA	NA	1	0	0	0	1	0	0
623	0	1	46	Spain	NA	NA	NA	NA	NA	NA	0	0	2020/3/15-2020/4/30	0	0	0	0	0	0	0	0	0	0	0	1	1	0	0	0	0	0	0	0	0	0	NA	NA	NA	NA	NA	NA	NA	0	0	0	0	0	0	0
624	0	1	74	Spain	NA	NA	NA	NA	NA	NA	0	0	2020/3/15-2020/4/30	1	0	0	1	0	0	0	1	0	0	0	1	1	0	0	0	0	1	0	0	0	0	NA	NA	NA	NA	NA	NA	NA	0	0	0	0	0	0	0
625	0	0	46	Spain	NA	NA	NA	NA	NA	NA	NA	0	2020/3/15-2020/4/30	0	0	0	0	0	0	0	0	0	0	0	1	1	1	1	0	0	0	0	0	0	0	NA	NA	NA	NA	NA	NA	NA	0	0	0	0	0	0	0
626	0	1	77	Spain	NA	NA	NA	NA	NA	NA	0	0	2020/3/15-2020/4/30	0	0	0	0	0	0	0	0	0	0	0	1	1	0	0	0	0	0	1	0	0	0	NA	NA	NA	NA	NA	NA	NA	0	0	0	0	0	0	0
627	0	1	73	Spain	NA	NA	NA	NA	NA	NA	0	0	2020/3/15-2020/4/30	1	0	1	1	0	0	0	0	0	0	0	1	1	1	0	0	0	0	0	0	0	0	NA	NA	NA	NA	NA	NA	NA	0	0	0	0	0	0	0
628	0	0	55	Spain	NA	NA	NA	NA	NA	NA	0	0	2020/3/15-2020/4/30	1	0	0	1	0	0	0	0	0	0	0	1	1	0	1	0	0	0	1	0	0	0	NA	NA	NA	NA	NA	NA	NA	0	0	0	0	0	0	0
629	0	1	57	Spain	NA	NA	NA	NA	NA	NA	0	0	2020/3/15-2020/4/30	0	0	0	0	0	0	0	0	0	0	0	1	1	1	1	0	0	0	0	0	0	0	NA	NA	NA	NA	NA	NA	NA	0	0	0	0	0	0	0
630	0	1	83	Spain	NA	NA	NA	NA	NA	NA	0	0	2020/3/15-2020/4/30	1	0	0	1	0	0	0	0	0	0	0	1	1	1	1	0	0	0	0	0	0	0	NA	NA	NA	NA	NA	NA	NA	0	0	0	0	0	0	0
631	0	0	29	Spain	NA	NA	NA	NA	NA	NA	0	0	2020/3/15-2020/4/30	0	0	0	0	0	0	0	0	0	0	0	1	1	1	1	0	0	0	0	0	0	0	NA	NA	NA	NA	NA	NA	NA	0	0	0	0	0	0	0
632	0	1	67	Spain	NA	NA	NA	NA	NA	NA	0	0	2020/3/15-2020/4/30	1	0	0	1	0	0	0	1	0	0	0	0	0	0	0	0	0	0	0	0	0	0	NA	NA	NA	NA	NA	NA	NA	0	0	0	0	0	0	0
633	0	0	69	Spain	NA	NA	NA	NA	NA	NA	0	0	2020/3/15-2020/4/30	1	0	1	1	0	0	0	1	0	0	0	1	1	0	1	0	0	0	0	0	0	0	NA	NA	NA	NA	NA	NA	NA	0	0	0	0	0	0	0
634	0	1	85	Spain	NA	NA	NA	NA	NA	NA	0	0	2020/3/15-2020/4/30	1	0	1	0	0	0	0	0	0	0	0	1	1	0	0	0	0	0	0	0	0	0	NA	NA	NA	NA	NA	NA	NA	0	0	0	0	0	0	0
635	0	1	56	Spain	NA	NA	NA	NA	NA	NA	0	0	2020/3/15-2020/4/30	0	0	0	0	0	0	0	0	0	0	0	1	1	1	1	0	0	0	0	0	0	0	NA	NA	NA	NA	NA	NA	NA	0	0	0	0	0	0	0
636	0	0	47	Spain	NA	NA	NA	NA	NA	NA	0	0	2020/3/15-2020/4/30	0	0	0	0	0	0	0	0	0	0	0	1	1	1	1	0	0	0	1	0	0	0	NA	NA	NA	NA	NA	NA	NA	0	0	0	0	0	0	0
637	0	0	59	Spain	NA	NA	NA	NA	NA	NA	0	0	2020/3/15-2020/4/30	1	0	0	0	0	1	0	0	0	0	0	1	1	1	1	0	0	0	1	0	0	0	NA	NA	NA	NA	NA	NA	NA	0	0	0	0	0	0	0
638	0	1	62	Spain	NA	NA	NA	NA	NA	NA	0	0	2020/3/15-2020/4/30	0	0	0	0	0	0	0	0	0	0	0	1	1	1	0	0	0	0	0	0	0	0	NA	NA	NA	NA	NA	NA	NA	0	0	0	0	0	0	0
639	0	1	55	Spain	NA	NA	NA	NA	NA	NA	0	0	2020/3/15-2020/4/30	0	0	0	0	0	0	0	0	0	0	0	1	1	1	1	0	0	1	1	0	0	0	NA	NA	NA	NA	NA	NA	NA	0	0	0	0	0	0	0
640	0	0	83	Spain	NA	NA	NA	NA	NA	NA	0	0	2020/3/15-2020/4/30	1	0	1	1	0	0	0	0	0	0	0	0	0	0	0	0	0	0	0	0	0	0	NA	NA	NA	NA	NA	NA	NA	0	0	0	0	0	0	0
641	0	0	84	Spain	NA	NA	NA	NA	NA	NA	0	0	2020/3/15-2020/4/30	0	0	0	0	0	0	0	0	0	0	0	0	0	0	0	0	0	0	0	0	0	0	NA	NA	NA	NA	NA	NA	NA	0	0	0	0	0	0	0
642	0	0	84	Spain	NA	NA	NA	NA	NA	NA	0	0	2020/3/15-2020/4/30	1	0	0	1	0	0	0	0	0	0	0	1	0	0	1	0	0	0	0	0	0	0	NA	NA	NA	NA	NA	NA	NA	0	0	0	0	0	0	0
643	0	1	80	Spain	NA	NA	NA	NA	NA	NA	0	0	2020/3/15-2020/4/30	1	0	0	1	0	0	0	0	0	0	0	1	0	0	0	0	0	0	1	0	0	0	NA	NA	NA	NA	NA	NA	NA	0	0	0	0	0	0	0
644	0	1	32	Spain	NA	NA	NA	NA	NA	NA	0	0	2020/3/15-2020/4/30	0	0	0	0	0	0	0	0	0	0	0	1	0	1	0	0	0	1	1	0	0	0	NA	NA	NA	NA	NA	NA	NA	0	0	0	0	0	0	0
645	0	1	60	Spain	NA	NA	NA	NA	NA	NA	0	0	2020/3/15-2020/4/30	1	0	1	1	0	0	0	0	0	0	0	1	1	1	1	0	0	1	0	0	0	0	NA	NA	NA	NA	NA	NA	NA	0	0	0	0	0	0	0
646	0	1	69	Spain	NA	NA	NA	NA	NA	NA	0	0	2020/3/15-2020/4/30	1	0	1	1	0	0	0	0	0	0	0	1	0	1	1	0	0	1	0	0	0	0	NA	NA	NA	NA	NA	NA	NA	0	0	0	0	0	0	0
647	0	0	68	Spain	NA	NA	NA	NA	NA	NA	0	0	2020/3/15-2020/4/30	1	0	0	1	0	0	0	0	0	0	0	1	1	0	1	0	0	0	0	0	0	0	NA	NA	NA	NA	NA	NA	NA	0	0	0	0	0	0	0
648	0	0	19	Spain	NA	NA	NA	NA	NA	NA	0	0	2020/3/15-2020/4/30	0	0	0	0	0	0	0	0	0	0	0	0	0	0	0	0	0	0	0	0	0	0	NA	NA	NA	NA	NA	NA	NA	0	0	0	0	0	0	0
649	0	0	77	Spain	NA	NA	NA	NA	NA	NA	0	0	2020/3/15-2020/4/30	1	0	0	1	0	0	0	0	0	0	0	1	1	1	1	0	0	1	0	0	0	0	NA	NA	NA	NA	NA	NA	NA	0	0	0	0	0	0	0
650	0	0	80	Spain	NA	NA	NA	NA	NA	NA	0	0	2020/3/15-2020/4/30	1	0	0	0	0	0	0	1	0	0	0	0	0	0	0	0	0	0	0	0	0	0	NA	NA	NA	NA	NA	NA	NA	0	0	0	0	0	0	0
651	0	1	63	Spain	NA	NA	NA	NA	NA	NA	0	0	2020/3/15-2020/4/30	0	0	0	0	0	0	0	0	0	0	0	0	0	0	0	0	0	0	0	0	0	0	NA	NA	NA	NA	NA	NA	NA	0	0	0	0	0	0	0
652	0	1	76	Spain	NA	NA	NA	NA	NA	NA	0	0	2020/3/15-2020/4/30	1	0	1	1	0	0	0	0	0	0	0	0	0	0	0	0	0	0	0	0	0	0	NA	NA	NA	NA	NA	NA	NA	0	0	0	0	0	0	0
653	0	0	83	Spain	NA	NA	NA	NA	NA	NA	0	0	2020/3/15-2020/4/30	1	0	1	1	0	0	0	0	0	0	0	0	0	0	0	0	0	0	0	0	0	0	NA	NA	NA	NA	NA	NA	NA	0	0	0	0	0	0	0
654	0	1	83	Spain	NA	NA	NA	NA	NA	NA	0	0	2020/3/15-2020/4/30	1	0	0	1	0	0	0	0	0	0	0	1	0	1	1	0	0	0	1	0	0	0	NA	NA	NA	NA	NA	NA	NA	0	0	0	0	0	0	0
655	0	1	78	Spain	NA	NA	NA	NA	NA	NA	0	0	2020/3/15-2020/4/30	1	0	0	1	0	0	0	0	0	0	0	1	1	1	1	0	0	0	0	0	0	0	NA	NA	NA	NA	NA	NA	NA	0	0	0	0	0	0	0
656	0	0	65	Spain	NA	NA	NA	NA	NA	NA	0	0	2020/3/15-2020/4/30	1	0	1	1	0	0	0	0	0	0	0	1	1	0	1	0	0	0	0	0	0	0	NA	NA	NA	NA	NA	NA	NA	0	0	0	0	0	0	0
657	0	1	62	Spain	NA	NA	NA	NA	NA	NA	0	0	2020/3/15-2020/4/30	1	0	0	1	0	0	0	0	0	0	0	1	1	1	1	0	0	0	0	0	0	0	NA	NA	NA	NA	NA	NA	NA	0	0	0	0	0	0	0
658	0	1	88	Spain	NA	NA	NA	NA	NA	NA	0	0	2020/3/15-2020/4/30	1	0	0	1	0	0	0	1	0	0	0	1	1	0	0	0	0	0	1	0	0	0	NA	NA	NA	NA	NA	NA	NA	0	0	0	0	0	0	0
659	0	1	76	Spain	NA	NA	NA	NA	NA	NA	0	0	2020/3/15-2020/4/30	0	0	0	0	0	0	0	0	0	0	0	1	1	1	0	0	0	0	0	0	0	0	NA	NA	NA	NA	NA	NA	NA	0	0	0	0	0	0	0
660	0	0	35	Spain	NA	NA	NA	NA	NA	NA	0	0	2020/3/15-2020/4/30	0	0	0	0	0	0	0	0	0	0	0	1	1	0	1	0	0	1	0	0	0	0	NA	NA	NA	NA	NA	NA	NA	0	0	0	0	0	0	0
661	0	1	89	Spain	NA	NA	NA	NA	NA	NA	0	0	2020/3/15-2020/4/30	0	0	0	0	0	0	0	0	0	0	0	1	1	1	1	0	0	1	0	0	0	0	NA	NA	NA	NA	NA	NA	NA	0	0	0	0	0	0	0
662	0	1	75	Spain	NA	NA	NA	NA	NA	NA	0	0	2020/3/15-2020/4/30	1	0	1	1	0	0	0	0	0	0	0	1	1	1	1	0	0	1	0	0	0	0	NA	NA	NA	NA	NA	NA	NA	0	0	0	0	0	0	0
663	0	0	77	Spain	NA	NA	NA	NA	NA	NA	0	0	2020/3/15-2020/4/30	1	0	0	1	0	0	0	0	0	0	0	1	1	1	0	0	0	0	1	0	0	0	NA	NA	NA	NA	NA	NA	NA	0	0	0	0	0	0	0
664	0	1	63	Spain	NA	NA	NA	NA	NA	NA	0	0	2020/3/15-2020/4/30	1	0	0	1	0	0	0	0	0	0	0	1	1	1	1	0	0	0	0	0	0	0	NA	NA	NA	NA	NA	NA	NA	0	0	0	0	0	0	0
665	0	0	77	Spain	NA	NA	NA	NA	NA	NA	0	0	2020/3/15-2020/4/30	1	0	1	1	0	0	0	0	0	0	0	0	0	0	0	0	0	0	0	0	0	0	NA	NA	NA	NA	NA	NA	NA	0	0	0	0	0	0	0
666	0	1	66	Spain	NA	NA	NA	NA	NA	NA	0	0	2020/3/15-2020/4/30	0	0	0	0	0	0	0	0	0	0	0	1	1	0	1	0	0	0	0	0	0	0	NA	NA	NA	NA	NA	NA	NA	0	0	0	0	0	0	0
667	0	0	52	Spain	NA	NA	NA	NA	NA	NA	0	0	2020/3/15-2020/4/30	0	0	0	0	0	0	0	0	0	0	0	1	1	1	1	0	0	1	1	0	0	0	NA	NA	NA	NA	NA	NA	NA	0	0	0	0	0	0	0
668	0	0	72	Spain	NA	NA	NA	NA	NA	NA	0	0	2020/3/15-2020/4/30	1	0	1	1	0	0	0	1	0	0	0	0	0	0	0	0	0	0	0	0	0	0	NA	NA	NA	NA	NA	NA	NA	0	0	0	0	0	0	0
669	0	0	41	Spain	NA	NA	NA	NA	NA	NA	0	0	2020/3/15-2020/4/30	0	0	0	0	0	0	0	0	0	0	0	1	1	1	0	0	0	0	1	0	0	0	NA	NA	NA	NA	NA	NA	NA	0	0	0	0	0	0	0
670	0	0	42	Spain	NA	NA	NA	NA	NA	NA	0	0	2020/3/15-2020/4/30	0	0	0	0	0	0	0	0	0	0	0	0	0	0	0	0	0	0	0	0	0	0	NA	NA	NA	NA	NA	NA	NA	0	0	0	0	0	0	0
671	0	1	44	America	2020-03-11	NA	NA	NA	24	NA	0	0	before 2020/4/16	1	1	0	0	0	0	0	0	0	0	0	NA	NA	NA	NA	NA	NA	NA	NA	NA	NA	NA	NA	NA	NA	NA	NA	NA	NA	NA	NA	NA	NA	NA	NA	NA
672	0	0	67	Austria	NA	2020-03-10	NA	NA	NA	NA	NA	NA	before 2020/3/10	1	0	0	0	0	0	0	0	0	1	0	NA	NA	NA	NA	NA	NA	NA	NA	NA	NA	NA	NA	NA	NA	NA	NA	NA	NA	NA	NA	NA	NA	NA	NA	NA
673	0	1	68	Belgium	NA	NA	NA	NA	NA	NA	0	0	2020/3/31-2020/4/18	1	0	1	0	0	0	0	0	0	0	0	NA	NA	NA	NA	NA	NA	NA	NA	NA	NA	NA	NA	NA	NA	NA	NA	NA	NA	NA	NA	NA	NA	NA	NA	NA
674	0	1	63	Belgium	NA	NA	NA	NA	NA	NA	0	0	2020/3/31-2020/4/18	1	1	0	0	0	0	0	0	0	0	0	NA	NA	NA	NA	NA	NA	NA	NA	NA	NA	NA	NA	NA	NA	NA	NA	NA	NA	NA	NA	NA	NA	NA	NA	NA
675	0	1	46	Belgium	NA	NA	NA	NA	NA	NA	0	0	2020/3/31-2020/4/18	1	1	0	0	0	0	0	0	0	0	0	NA	NA	NA	NA	NA	NA	NA	NA	NA	NA	NA	NA	NA	NA	NA	NA	NA	NA	NA	NA	NA	NA	NA	NA	NA
676	0	0	82	Belgium	NA	NA	NA	NA	NA	NA	0	0	2020/3/31-2020/4/18	1	1	0	0	0	0	0	0	0	0	0	NA	NA	NA	NA	NA	NA	NA	NA	NA	NA	NA	NA	NA	NA	NA	NA	NA	NA	NA	NA	NA	NA	NA	NA	NA
677	0	1	59	Belgium	NA	NA	NA	NA	NA	NA	0	0	2020/3/31-2020/4/18	1	1	1	0	0	0	0	0	0	0	0	NA	NA	NA	NA	NA	NA	NA	NA	NA	NA	NA	NA	NA	NA	NA	NA	NA	NA	NA	NA	NA	NA	NA	NA	NA
678	0	1	67	France	NA	NA	NA	NA	NA	NA	0	0	2020/3/25-2020/4/25	1	1	0	1	0	0	0	0	0	0	0	NA	NA	NA	NA	NA	NA	NA	NA	NA	NA	NA	NA	NA	NA	NA	NA	NA	NA	NA	NA	NA	NA	NA	NA	NA
679	0	1	31	France	NA	NA	NA	NA	NA	NA	0	0	2020/3/25-2020/4/25	1	0	0	0	0	0	0	0	0	0	0	NA	NA	NA	NA	NA	NA	NA	NA	NA	NA	NA	NA	NA	NA	NA	NA	NA	NA	NA	NA	NA	NA	NA	NA	NA
680	0	1	46	France	NA	NA	NA	NA	NA	NA	0	0	2020/3/25-2020/4/25	1	1	0	0	0	0	0	0	0	0	0	NA	NA	NA	NA	NA	NA	NA	NA	NA	NA	NA	NA	NA	NA	NA	NA	NA	NA	NA	NA	NA	NA	NA	NA	NA
681	0	1	47	France	NA	NA	NA	NA	NA	NA	0	0	2020/3/25-2020/4/25	1	1	1	0	0	0	0	0	0	0	0	NA	NA	NA	NA	NA	NA	NA	NA	NA	NA	NA	NA	NA	NA	NA	NA	NA	NA	NA	NA	NA	NA	NA	NA	NA
682	0	1	66	France	NA	NA	NA	NA	NA	NA	0	0	2020/3/25-2020/4/25	1	0	1	0	0	0	0	0	0	0	0	NA	NA	NA	NA	NA	NA	NA	NA	NA	NA	NA	NA	NA	NA	NA	NA	NA	NA	NA	NA	NA	NA	NA	NA	NA
683	0	0	70	France	NA	NA	NA	NA	NA	NA	0	0	2020/3/25-2020/4/25	1	1	1	1	0	0	1	0	0	0	0	NA	NA	NA	NA	NA	NA	NA	NA	NA	NA	NA	NA	NA	NA	NA	NA	NA	NA	NA	NA	NA	NA	NA	NA	NA
684	0	0	64	France	NA	NA	NA	NA	NA	NA	0	0	2020/3/25-2020/4/25	1	0	0	0	0	0	0	0	0	0	0	NA	NA	NA	NA	NA	NA	NA	NA	NA	NA	NA	NA	NA	NA	NA	NA	NA	NA	NA	NA	NA	NA	NA	NA	NA
685	0	1	73	France	NA	NA	NA	NA	NA	NA	0	0	2020/3/25-2020/4/25	1	1	0	0	0	0	0	0	0	0	0	NA	NA	NA	NA	NA	NA	NA	NA	NA	NA	NA	NA	NA	NA	NA	NA	NA	NA	NA	NA	NA	NA	NA	NA	NA
686	0	1	65	France	NA	NA	NA	NA	NA	NA	0	0	2020/3/25-2020/4/25	1	1	0	0	0	0	0	0	0	0	0	NA	NA	NA	NA	NA	NA	NA	NA	NA	NA	NA	NA	NA	NA	NA	NA	NA	NA	NA	NA	NA	NA	NA	NA	NA
687	0	1	67	France	NA	NA	NA	NA	NA	NA	0	0	2020/3/25-2020/4/25	1	1	0	0	0	0	0	1	0	0	0	NA	NA	NA	NA	NA	NA	NA	NA	NA	NA	NA	NA	NA	NA	NA	NA	NA	NA	NA	NA	NA	NA	NA	NA	NA
688	0	1	52	France	NA	NA	NA	NA	NA	NA	0	0	2020/3/25-2020/4/25	1	0	0	0	0	0	0	0	0	0	0	NA	NA	NA	NA	NA	NA	NA	NA	NA	NA	NA	NA	NA	NA	NA	NA	NA	NA	NA	NA	NA	NA	NA	NA	NA
689	0	1	76	France	NA	NA	NA	NA	NA	NA	0	0	2020/3/25-2020/4/25	1	1	0	1	0	0	0	0	0	0	0	NA	NA	NA	NA	NA	NA	NA	NA	NA	NA	NA	NA	NA	NA	NA	NA	NA	NA	NA	NA	NA	NA	NA	NA	NA
690	0	0	56	France	NA	NA	NA	NA	NA	NA	0	0	2020/3/25-2020/4/25	1	1	1	0	0	0	0	0	0	0	0	NA	NA	NA	NA	NA	NA	NA	NA	NA	NA	NA	NA	NA	NA	NA	NA	NA	NA	NA	NA	NA	NA	NA	NA	NA
691	0	1	68	France	NA	NA	NA	NA	NA	NA	0	0	2020/3/25-2020/4/25	1	0	0	0	0	0	0	0	0	0	0	NA	NA	NA	NA	NA	NA	NA	NA	NA	NA	NA	NA	NA	NA	NA	NA	NA	NA	NA	NA	NA	NA	NA	NA	NA
692	0	0	24.9	France	NA	NA	NA	NA	NA	NA	0	0	2020/3/12-2020/4/13	1	0	0	0	0	0	0	0	0	0	0	NA	NA	NA	NA	NA	NA	NA	NA	NA	NA	NA	NA	NA	NA	NA	NA	NA	NA	1	0	0	0	1	0	0
693	0	0	32.6	France	NA	NA	NA	NA	NA	NA	0	0	2020/3/12-2020/4/13	1	1	0	0	0	0	0	0	0	0	0	NA	NA	NA	NA	NA	NA	NA	NA	NA	NA	NA	NA	NA	NA	NA	NA	NA	NA	1	0	0	0	1	0	0
694	0	0	39.4	France	NA	NA	NA	NA	NA	NA	0	0	2020/3/12-2020/4/13	1	0	0	0	0	0	0	0	0	0	0	NA	NA	NA	NA	NA	NA	NA	NA	NA	NA	NA	NA	NA	NA	NA	NA	NA	NA	NA	NA	NA	NA	NA	NA	NA
695	0	0	26.1	France	NA	NA	NA	NA	NA	NA	0	0	2020/3/12-2020/4/13	1	0	0	0	0	0	0	0	0	0	0	NA	NA	NA	NA	NA	NA	NA	NA	NA	NA	NA	NA	NA	NA	NA	NA	NA	NA	NA	NA	NA	NA	NA	NA	NA
696	0	0	58	Italy	NA	NA	NA	NA	NA	NA	0	0	before 2020/4/24	1	0	1	1	1	0	0	0	0	0	0	NA	NA	NA	NA	NA	NA	NA	NA	NA	NA	NA	NA	NA	NA	NA	NA	NA	NA	NA	NA	NA	NA	NA	NA	NA
697	0	0	53	Italy	NA	NA	NA	NA	NA	NA	0	0	before 2020/4/24	1	0	0	1	1	0	0	0	0	0	0	NA	NA	NA	NA	NA	NA	NA	NA	NA	NA	NA	NA	NA	NA	NA	NA	NA	NA	NA	NA	NA	NA	NA	NA	NA
698	0	1	61	Italy	NA	NA	NA	NA	NA	NA	0	0	before 2020/4/24	1	0	1	0	1	0	0	0	0	1	0	NA	NA	NA	NA	NA	NA	NA	NA	NA	NA	NA	NA	NA	NA	NA	NA	NA	NA	NA	NA	NA	NA	NA	NA	NA
699	0	1	56	Italy	NA	NA	NA	NA	NA	NA	0	0	before 2020/4/24	1	0	1	1	1	0	0	0	0	0	0	NA	NA	NA	NA	NA	NA	NA	NA	NA	NA	NA	NA	NA	NA	NA	NA	NA	NA	NA	NA	NA	NA	NA	NA	NA
700	0	1	49	Italy	NA	NA	NA	NA	NA	NA	0	0	before 2020/4/24	1	0	1	0	0	0	0	0	0	0	0	NA	NA	NA	NA	NA	NA	NA	NA	NA	NA	NA	NA	NA	NA	NA	NA	NA	NA	NA	NA	NA	NA	NA	NA	NA
701	0	1	76	Italy	NA	NA	NA	NA	NA	22	0	0	before 2020/3/27	1	1	1	0	0	0	0	0	0	0	0	NA	NA	NA	NA	NA	NA	NA	NA	NA	NA	NA	1	0	0	0	0	0	0	NA	NA	NA	NA	NA	NA	NA
702	0	1	52	Italy	NA	NA	NA	NA	NA	14	0	0	before 2020/3/27	1	1	0	1	0	0	0	0	0	0	0	NA	NA	NA	NA	NA	NA	NA	NA	NA	NA	NA	NA	NA	NA	NA	NA	NA	NA	NA	NA	NA	NA	NA	NA	NA
703	0	0	37	America	2020-02-25	NA	NA	NA	NA	NA	NA	NA	before 2020/3/13	NA	NA	NA	NA	NA	NA	NA	NA	NA	NA	NA	1	1	0	0	1	0	0	0	1	0	0	NA	NA	NA	NA	NA	NA	NA	NA	NA	NA	NA	NA	NA	NA
704	0	0	37	America	2020-02-25	NA	NA	NA	NA	NA	NA	NA	2020-02-25	NA	NA	NA	NA	NA	NA	NA	NA	NA	NA	NA	1	1	0	0	1	0	0	0	1	0	0	NA	NA	NA	NA	NA	NA	NA	NA	NA	NA	NA	NA	NA	NA
705	0	0	56	America	NA	NA	NA	NA	21	NA	0	0	before 2020/4/9	NA	NA	NA	NA	NA	NA	NA	NA	NA	NA	NA	1	1	1	1	0	1	0	0	0	0	0	1	0	0	0	0	0	0	NA	NA	NA	NA	NA	NA	NA
706	0	0	35	America	NA	NA	NA	5	NA	NA	0	0	before 2020/4/20	NA	NA	NA	NA	NA	NA	NA	NA	NA	NA	NA	1	1	1	1	0	0	0	1	1	0	0	1	0	0	0	0	0	0	NA	NA	NA	NA	NA	NA	NA
707	0	0	68	America	NA	NA	NA	NA	NA	NA	0	0	before 2020/4/20	NA	NA	NA	NA	NA	NA	NA	NA	NA	NA	NA	1	0	0	1	0	0	0	1	0	0	0	1	0	0	0	0	0	0	NA	NA	NA	NA	NA	NA	NA
708	0	1	36	Austria	NA	2020-03-11	2020-04-21	NA	42	NA	0	0	2020-04-21	NA	NA	NA	NA	NA	NA	NA	NA	NA	NA	NA	1	1	0	1	0	0	0	0	0	0	0	NA	NA	NA	NA	NA	NA	NA	NA	NA	NA	NA	NA	NA	NA
709	0	0	59	Canada	2020-03-16	2020-03-28	NA	13	NA	NA	NA	NA	before 2020/4/19	NA	NA	NA	NA	NA	NA	NA	NA	NA	NA	NA	1	1	1	1	1	1	0	1	0	0	0	NA	NA	NA	NA	NA	NA	NA	NA	NA	NA	NA	NA	NA	NA
710	0	1	64	France	NA	NA	NA	NA	NA	NA	0	0	before 2020/4/27	NA	NA	NA	NA	NA	NA	NA	NA	NA	NA	NA	1	1	1	0	0	0	0	1	0	0	0	NA	NA	NA	NA	NA	NA	NA	NA	NA	NA	NA	NA	NA	NA
711	0	1	72	France	NA	NA	NA	NA	NA	NA	0	0	before 2020/4/27	NA	NA	NA	NA	NA	NA	NA	NA	NA	NA	NA	1	0	1	0	0	0	0	1	0	0	0	NA	NA	NA	NA	NA	NA	NA	NA	NA	NA	NA	NA	NA	NA
712	0	1	85	France	NA	NA	NA	NA	NA	NA	NA	NA	2020/3/20-2020/3/31	NA	NA	NA	NA	NA	NA	NA	NA	NA	NA	NA	1	0	0	0	1	0	0	0	0	0	0	1	0	0	0	0	0	0	NA	NA	NA	NA	NA	NA	NA
713	0	0	30	France	NA	NA	NA	NA	NA	4	NA	NA	2020/3/20-2020/3/31	NA	NA	NA	NA	NA	NA	NA	NA	NA	NA	NA	1	1	0	0	0	0	0	0	0	0	0	1	0	0	0	0	0	0	NA	NA	NA	NA	NA	NA	NA
714	0	0	45	France	NA	NA	NA	NA	NA	NA	0	0	2020/3/19-2020/4/19	NA	NA	NA	NA	NA	NA	NA	NA	NA	NA	NA	1	0	0	0	0	0	0	0	0	0	0	NA	NA	NA	NA	NA	NA	NA	NA	NA	NA	NA	NA	NA	NA
715	0	1	60	France	NA	NA	NA	NA	NA	NA	0	0	2020/3/19-2020/4/19	NA	NA	NA	NA	NA	NA	NA	NA	NA	NA	NA	1	0	0	1	0	0	0	0	0	0	0	NA	NA	NA	NA	NA	NA	NA	1	0	0	0	1	0	0
716	0	0	23	France	NA	NA	NA	NA	NA	NA	0	0	2020/3-2020/4	NA	NA	NA	NA	NA	NA	NA	NA	NA	NA	NA	1	0	0	0	1	1	0	0	1	0	1	NA	NA	NA	NA	NA	NA	NA	NA	NA	NA	NA	NA	NA	NA
717	0	0	31	France	NA	NA	NA	NA	NA	NA	0	0	2020/3-2020/4	NA	NA	NA	NA	NA	NA	NA	NA	NA	NA	NA	1	0	1	1	1	1	0	1	1	0	0	NA	NA	NA	NA	NA	NA	NA	NA	NA	NA	NA	NA	NA	NA
718	0	0	27	France	NA	NA	NA	NA	NA	NA	0	0	2020/3-2020/4	NA	NA	NA	NA	NA	NA	NA	NA	NA	NA	NA	1	1	1	0	1	1	0	0	1	0	1	NA	NA	NA	NA	NA	NA	NA	NA	NA	NA	NA	NA	NA	NA
719	0	0	60	Germany	NA	NA	NA	NA	NA	NA	NA	NA	before 2020/4/18	NA	NA	NA	NA	NA	NA	NA	NA	NA	NA	NA	1	1	0	1	1	0	0	0	0	0	0	NA	NA	NA	NA	NA	NA	NA	NA	NA	NA	NA	NA	NA	NA
720	0	1	78	Italy	NA	NA	NA	NA	NA	25	0	0	before 2020/3/27	NA	NA	NA	NA	NA	NA	NA	NA	NA	NA	NA	1	1	1	0	0	0	0	0	0	0	0	1	0	0	0	0	0	0	NA	NA	NA	NA	NA	NA	NA
721	0	0	62	Italy	NA	NA	NA	NA	NA	7	0	0	before 2020/3/27	NA	NA	NA	NA	NA	NA	NA	NA	NA	NA	NA	1	1	0	0	0	0	0	0	0	0	0	1	0	0	0	0	0	0	NA	NA	NA	NA	NA	NA	NA
722	0	1	65	Italy	NA	NA	NA	NA	NA	50	0	0	before 2020/3/27	NA	NA	NA	NA	NA	NA	NA	NA	NA	NA	NA	1	1	1	0	0	0	0	0	0	0	0	1	0	0	0	0	0	0	1	0	0	0	1	0	0
723	0	1	45	Italy	NA	NA	NA	NA	NA	15	0	0	before 2020/3/27	NA	NA	NA	NA	NA	NA	NA	NA	NA	NA	NA	1	1	1	0	0	0	0	0	0	0	0	NA	NA	NA	NA	NA	NA	NA	1	0	0	0	1	0	0
724	0	0	40	Italy	NA	NA	NA	NA	NA	26	0	0	before 2020/3/27	NA	NA	NA	NA	NA	NA	NA	NA	NA	NA	NA	1	1	1	0	0	0	0	0	0	0	0	1	0	0	0	0	0	0	1	0	0	0	1	0	0
725	0	1	46	Italy	NA	NA	NA	NA	NA	16	0	0	before 2020/3/27	NA	NA	NA	NA	NA	NA	NA	NA	NA	NA	NA	1	1	0	0	0	0	0	0	0	0	0	1	0	0	0	0	0	0	1	0	0	0	1	0	0
726	0	0	31	Portugal	NA	2020-03-17	NA	NA	NA	NA	NA	NA	before 2020/4/2	NA	NA	NA	NA	NA	NA	NA	NA	NA	NA	NA	1	0	1	0	0	0	0	0	0	0	0	NA	NA	NA	NA	NA	NA	NA	NA	NA	NA	NA	NA	NA	NA
727	0	0	104	America	2020-03-23	2020-03-23	NA	0	NA	NA	NA	NA	before 2020/4/10	NA	NA	NA	NA	NA	NA	NA	NA	NA	NA	NA	NA	NA	NA	NA	NA	NA	NA	NA	NA	NA	NA	NA	NA	NA	NA	NA	NA	NA	NA	NA	NA	NA	NA	NA	NA
728	0	0	54	Austria	NA	2020-03-16	2020-04-07	NA	23	NA	NA	NA	2020-04-07	NA	NA	NA	NA	NA	NA	NA	NA	NA	NA	NA	NA	NA	NA	NA	NA	NA	NA	NA	NA	NA	NA	NA	NA	NA	NA	NA	NA	NA	NA	NA	NA	NA	NA	NA	NA
729	0	0	26	Austria	2020-02-08	2020-03-09	NA	31	NA	NA	NA	NA	before 2020/3/10	NA	NA	NA	NA	NA	NA	NA	NA	NA	NA	NA	NA	NA	NA	NA	NA	NA	NA	NA	NA	NA	NA	NA	NA	NA	NA	NA	NA	NA	NA	NA	NA	NA	NA	NA	NA
730	0	1	50	Austria	2020-02-27	2020-03-09	NA	12	NA	NA	NA	NA	before 2020/3/10	NA	NA	NA	NA	NA	NA	NA	NA	NA	NA	NA	NA	NA	NA	NA	NA	NA	NA	NA	NA	NA	NA	NA	NA	NA	NA	NA	NA	NA	NA	NA	NA	NA	NA	NA	NA
731	0	1	49	Austria	2020-03-02	2020-03-09	NA	8	NA	NA	NA	NA	before 2020/3/10	NA	NA	NA	NA	NA	NA	NA	NA	NA	NA	NA	NA	NA	NA	NA	NA	NA	NA	NA	NA	NA	NA	NA	NA	NA	NA	NA	NA	NA	NA	NA	NA	NA	NA	NA	NA
732	0	0	25	Austria	2020-03-05	2020-03-09	NA	5	NA	NA	NA	NA	before 2020/3/10	NA	NA	NA	NA	NA	NA	NA	NA	NA	NA	NA	NA	NA	NA	NA	NA	NA	NA	NA	NA	NA	NA	NA	NA	NA	NA	NA	NA	NA	NA	NA	NA	NA	NA	NA	NA
733	0	0	23	Austria	2020-03-06	2020-03-09	NA	4	NA	NA	NA	NA	before 2020/3/10	NA	NA	NA	NA	NA	NA	NA	NA	NA	NA	NA	NA	NA	NA	NA	NA	NA	NA	NA	NA	NA	NA	NA	NA	NA	NA	NA	NA	NA	NA	NA	NA	NA	NA	NA	NA
734	0	0	24	Austria	2020-03-06	2020-03-09	NA	4	NA	NA	NA	NA	before 2020/3/10	NA	NA	NA	NA	NA	NA	NA	NA	NA	NA	NA	NA	NA	NA	NA	NA	NA	NA	NA	NA	NA	NA	NA	NA	NA	NA	NA	NA	NA	NA	NA	NA	NA	NA	NA	NA
735	0	1	43	Austria	2020-03-07	2020-03-09	NA	3	NA	NA	NA	NA	before 2020/3/10	NA	NA	NA	NA	NA	NA	NA	NA	NA	NA	NA	NA	NA	NA	NA	NA	NA	NA	NA	NA	NA	NA	NA	NA	NA	NA	NA	NA	NA	NA	NA	NA	NA	NA	NA	NA
736	0	0	30	Austria	2020-03-07	2020-03-09	NA	3	NA	NA	NA	NA	before 2020/3/10	NA	NA	NA	NA	NA	NA	NA	NA	NA	NA	NA	NA	NA	NA	NA	NA	NA	NA	NA	NA	NA	NA	NA	NA	NA	NA	NA	NA	NA	NA	NA	NA	NA	NA	NA	NA
737	0	1	52	Austria	2020-03-07	2020-03-09	NA	3	NA	NA	NA	NA	before 2020/3/10	NA	NA	NA	NA	NA	NA	NA	NA	NA	NA	NA	NA	NA	NA	NA	NA	NA	NA	NA	NA	NA	NA	NA	NA	NA	NA	NA	NA	NA	NA	NA	NA	NA	NA	NA	NA
738	0	1	44	Austria	2020-03-07	2020-03-09	NA	3	NA	NA	NA	NA	before 2020/3/10	NA	NA	NA	NA	NA	NA	NA	NA	NA	NA	NA	NA	NA	NA	NA	NA	NA	NA	NA	NA	NA	NA	NA	NA	NA	NA	NA	NA	NA	NA	NA	NA	NA	NA	NA	NA
739	0	0	44	Austria	2020-03-08	2020-03-10	NA	3	NA	NA	NA	NA	before 2020/3/10	NA	NA	NA	NA	NA	NA	NA	NA	NA	NA	NA	NA	NA	NA	NA	NA	NA	NA	NA	NA	NA	NA	NA	NA	NA	NA	NA	NA	NA	NA	NA	NA	NA	NA	NA	NA
740	0	0	25	Austria	NA	2020-03-06	NA	NA	NA	NA	NA	NA	before 2020/3/10	NA	NA	NA	NA	NA	NA	NA	NA	NA	NA	NA	NA	NA	NA	NA	NA	NA	NA	NA	NA	NA	NA	NA	NA	NA	NA	NA	NA	NA	NA	NA	NA	NA	NA	NA	NA
741	0	0	23	Austria	NA	2020-03-06	NA	NA	NA	NA	NA	NA	before 2020/3/10	NA	NA	NA	NA	NA	NA	NA	NA	NA	NA	NA	NA	NA	NA	NA	NA	NA	NA	NA	NA	NA	NA	NA	NA	NA	NA	NA	NA	NA	NA	NA	NA	NA	NA	NA	NA
742	0	0	40	Austria	NA	2020-03-09	NA	NA	NA	NA	NA	NA	before 2020/3/10	NA	NA	NA	NA	NA	NA	NA	NA	NA	NA	NA	NA	NA	NA	NA	NA	NA	NA	NA	NA	NA	NA	NA	NA	NA	NA	NA	NA	NA	NA	NA	NA	NA	NA	NA	NA
743	0	0	21	Austria	NA	2020-03-10	NA	NA	NA	NA	NA	NA	before 2020/3/10	NA	NA	NA	NA	NA	NA	NA	NA	NA	NA	NA	NA	NA	NA	NA	NA	NA	NA	NA	NA	NA	NA	NA	NA	NA	NA	NA	NA	NA	NA	NA	NA	NA	NA	NA	NA
744	0	1	47	Belgium	NA	NA	NA	NA	NA	NA	0	0	2020/3/31-2020/4/18	NA	NA	NA	NA	NA	NA	NA	NA	NA	NA	NA	NA	NA	NA	NA	NA	NA	NA	NA	NA	NA	NA	NA	NA	NA	NA	NA	NA	NA	NA	NA	NA	NA	NA	NA	NA
745	0	1	64	Belgium	NA	NA	NA	NA	NA	NA	0	0	2020/3/31-2020/4/18	NA	NA	NA	NA	NA	NA	NA	NA	NA	NA	NA	NA	NA	NA	NA	NA	NA	NA	NA	NA	NA	NA	NA	NA	NA	NA	NA	NA	NA	NA	NA	NA	NA	NA	NA	NA
746	0	0	56	France	NA	NA	NA	NA	NA	NA	0	0	2020/3/25-2020/4/25	NA	NA	NA	NA	NA	NA	NA	NA	NA	NA	NA	NA	NA	NA	NA	NA	NA	NA	NA	NA	NA	NA	NA	NA	NA	NA	NA	NA	NA	NA	NA	NA	NA	NA	NA	NA
747	0	1	60	France	NA	NA	NA	NA	NA	NA	0	0	2020/3/25-2020/4/25	NA	NA	NA	NA	NA	NA	NA	NA	NA	NA	NA	NA	NA	NA	NA	NA	NA	NA	NA	NA	NA	NA	NA	NA	NA	NA	NA	NA	NA	NA	NA	NA	NA	NA	NA	NA
748	0	0	30.9	France	NA	NA	NA	NA	NA	NA	0	0	2020/3/12-2020/4/13	NA	NA	NA	NA	NA	NA	NA	NA	NA	NA	NA	NA	NA	NA	NA	NA	NA	NA	NA	NA	NA	NA	NA	NA	NA	NA	NA	NA	NA	1	0	0	0	1	0	0
749	0	0	26.5	France	NA	NA	NA	NA	NA	NA	0	0	2020/3/12-2020/4/13	NA	NA	NA	NA	NA	NA	NA	NA	NA	NA	NA	NA	NA	NA	NA	NA	NA	NA	NA	NA	NA	NA	NA	NA	NA	NA	NA	NA	NA	1	0	0	0	1	0	0
750	0	0	33.6	France	NA	NA	NA	NA	NA	NA	0	0	2020/3/12-2020/4/13	NA	NA	NA	NA	NA	NA	NA	NA	NA	NA	NA	NA	NA	NA	NA	NA	NA	NA	NA	NA	NA	NA	NA	NA	NA	NA	NA	NA	NA	NA	NA	NA	NA	NA	NA	NA
751	0	0	33.1	France	NA	NA	NA	NA	NA	NA	0	0	2020/3/12-2020/4/13	NA	NA	NA	NA	NA	NA	NA	NA	NA	NA	NA	NA	NA	NA	NA	NA	NA	NA	NA	NA	NA	NA	NA	NA	NA	NA	NA	NA	NA	1	0	0	0	1	0	0
752	0	0	33.4	France	NA	NA	NA	NA	NA	NA	0	0	2020/3/12-2020/4/13	NA	NA	NA	NA	NA	NA	NA	NA	NA	NA	NA	NA	NA	NA	NA	NA	NA	NA	NA	NA	NA	NA	NA	NA	NA	NA	NA	NA	NA	NA	NA	NA	NA	NA	NA	NA
753	0	0	42.1	France	NA	NA	NA	NA	NA	NA	0	0	2020/3/12-2020/4/13	NA	NA	NA	NA	NA	NA	NA	NA	NA	NA	NA	NA	NA	NA	NA	NA	NA	NA	NA	NA	NA	NA	NA	NA	NA	NA	NA	NA	NA	1	0	0	0	1	0	0
754	0	1	48	Italy	NA	NA	NA	NA	NA	NA	0	0	before 2020/4/24	NA	NA	NA	NA	NA	NA	NA	NA	NA	NA	NA	NA	NA	NA	NA	NA	NA	NA	NA	NA	NA	NA	NA	NA	NA	NA	NA	NA	NA	NA	NA	NA	NA	NA	NA	NA
755	0	0	73	Italy	NA	NA	NA	NA	NA	11	0	0	before 2020/3/27	NA	NA	NA	NA	NA	NA	NA	NA	NA	NA	NA	NA	NA	NA	NA	NA	NA	NA	NA	NA	NA	NA	NA	NA	NA	NA	NA	NA	NA	NA	NA	NA	NA	NA	NA	NA
756	0	0	106	Slovenia	NA	NA	2020-04-20	NA	NA	NA	NA	NA	before 2020/4/20	NA	NA	NA	NA	NA	NA	NA	NA	NA	NA	NA	NA	NA	NA	NA	NA	NA	NA	NA	NA	NA	NA	NA	NA	NA	NA	NA	NA	NA	NA	NA	NA	NA	NA	NA	NA
757	0	1	101	Spain	NA	NA	NA	NA	NA	NA	NA	NA	before 2020/3/29	NA	NA	NA	NA	NA	NA	NA	NA	NA	NA	NA	NA	NA	NA	NA	NA	NA	NA	NA	NA	NA	NA	NA	NA	NA	NA	NA	NA	NA	NA	NA	NA	NA	NA	NA	NA
758	0	1	71	Turkey	NA	2020-04-01	2020-04-09	NA	9	NA	NA	NA	2020-04-09	NA	NA	NA	NA	NA	NA	NA	NA	NA	NA	NA	NA	NA	NA	NA	NA	NA	NA	NA	NA	NA	NA	NA	NA	NA	NA	NA	NA	NA	NA	NA	NA	NA	NA	NA	NA
759	0	1	29	America	NA	NA	NA	NA	NA	NA	0	0	before 2020/6/28	1	0	0	0	0	0	0	0	0	0	1	1	0	0	1	1	0	0	0	0	0	0	0	0	0	0	0	0	1	NA	NA	NA	NA	NA	NA	NA
760	0	1	53	America	NA	NA	NA	NA	NA	NA	0	0	before 2020/6/28	1	0	0	0	0	0	0	0	0	0	1	1	1	0	1	1	0	0	0	0	0	0	NA	NA	NA	NA	NA	NA	NA	NA	NA	NA	NA	NA	NA	NA
761	0	1	79	Croatia	NA	NA	NA	NA	NA	NA	NA	NA	before 2020/8/1	1	0	1	0	0	0	0	0	0	0	0	1	0	0	1	1	0	0	0	0	0	0	NA	NA	NA	NA	NA	NA	NA	1	0	0	0	0	0	1
762	0	1	55	France	NA	NA	NA	NA	21	NA	0	0	2020/4/6-2020/5/14	1	0	0	1	0	0	0	0	0	0	0	1	1	0	0	1	0	0	0	1	0	0	NA	NA	NA	NA	NA	NA	NA	NA	NA	NA	NA	NA	NA	NA
763	0	0	91	France	NA	NA	NA	NA	13	NA	0	0	2020/4/6-2020/5/14	1	0	1	1	0	0	0	0	0	0	0	1	1	0	0	1	0	0	0	1	0	0	NA	NA	NA	NA	NA	NA	NA	NA	NA	NA	NA	NA	NA	NA
764	0	1	85	France	NA	NA	NA	NA	17	NA	0	0	2020/4/6-2020/5/14	1	0	0	1	1	0	0	0	0	0	0	1	1	1	0	1	0	0	0	0	0	0	NA	NA	NA	NA	NA	NA	NA	NA	NA	NA	NA	NA	NA	NA
765	0	1	76	France	2020-02-22	2020-02-22	2020-03-15	1	23	23	0	1	before 2020/5/12	1	0	0	0	0	0	0	0	0	0	0	1	1	1	0	0	0	0	0	0	0	0	1	0	0	0	0	0	0	NA	NA	NA	NA	NA	NA	NA
766	0	1	48	France	2020-01-16	2020-01-24	2020-02-14	9	22	30	0	1	before 2020/3/27	1	1	0	0	0	0	0	0	0	0	0	1	1	1	0	0	0	0	0	0	0	0	1	0	0	0	0	0	0	NA	NA	NA	NA	NA	NA	NA
767	0	1	72	Mexico	NA	NA	NA	NA	NA	NA	0	0	2020/4/17-2020/5/8	1	1	1	0	0	0	0	0	0	0	0	1	0	0	1	0	0	0	0	0	0	0	NA	NA	NA	NA	NA	NA	NA	NA	NA	NA	NA	NA	NA	NA
768	0	1	27	Mexico	NA	NA	NA	NA	NA	NA	0	0	2020/4/17-2020/5/8	1	0	1	0	0	0	0	0	0	0	0	1	0	0	1	0	0	0	0	0	0	0	NA	NA	NA	NA	NA	NA	NA	NA	NA	NA	NA	NA	NA	NA
769	0	1	67	Romania	NA	NA	NA	NA	NA	NA	0	0	2020/4/1-2020/5/15	1	1	1	0	1	0	0	0	0	0	0	1	0	0	0	0	0	0	0	1	0	0	NA	NA	NA	NA	NA	NA	NA	1	0	0	0	0	0	1
770	0	0	78	Spain	NA	NA	NA	NA	NA	NA	1	0	2020/3/15-2020/4/30	0	0	0	0	0	0	0	0	0	0	0	0	0	0	0	0	0	0	0	0	0	0	NA	NA	NA	NA	NA	NA	NA	0	0	0	0	0	0	0
771	0	1	74	Spain	NA	NA	NA	NA	NA	NA	1	0	2020/3/15-2020/4/30	0	0	0	0	0	0	0	0	0	0	0	1	1	1	1	0	0	1	0	0	0	0	NA	NA	NA	NA	NA	NA	NA	1	0	0	0	1	0	0
772	0	0	66	Spain	NA	NA	NA	NA	NA	NA	1	0	2020/3/15-2020/4/30	0	0	0	0	0	0	0	0	0	0	0	1	1	1	1	0	0	0	1	0	0	0	NA	NA	NA	NA	NA	NA	NA	0	0	0	0	0	0	0
773	0	1	50	Spain	NA	NA	NA	NA	NA	NA	1	0	2020/3/15-2020/4/30	0	0	0	0	0	0	0	0	0	0	0	1	1	1	1	0	0	0	1	0	0	0	NA	NA	NA	NA	NA	NA	NA	0	0	0	0	0	0	0
774	0	0	69	Spain	NA	NA	NA	NA	NA	NA	1	0	2020/3/15-2020/4/30	0	0	0	0	0	0	0	0	0	0	0	1	1	1	0	0	0	0	0	0	0	0	NA	NA	NA	NA	NA	NA	NA	0	0	0	0	0	0	0
775	0	1	81	Spain	NA	NA	NA	NA	NA	NA	1	0	2020/3/15-2020/4/30	1	0	0	0	0	0	0	1	0	0	0	1	0	1	1	0	0	0	0	0	0	0	NA	NA	NA	NA	NA	NA	NA	0	0	0	0	0	0	0
776	0	0	73	Spain	NA	NA	NA	NA	NA	NA	1	0	2020/3/15-2020/4/30	1	0	1	1	0	0	0	1	0	0	0	1	0	1	1	0	0	0	0	0	0	0	NA	NA	NA	NA	NA	NA	NA	0	0	0	0	0	0	0
777	0	1	34	Spain	NA	NA	NA	NA	NA	NA	1	0	2020/3/15-2020/4/30	0	0	0	0	0	0	0	0	0	0	0	1	1	1	1	0	0	0	0	0	0	0	NA	NA	NA	NA	NA	NA	NA	0	0	0	0	0	0	0
778	0	1	59	Spain	NA	NA	NA	NA	NA	NA	1	0	2020/3/15-2020/4/30	0	0	0	0	0	0	0	0	0	0	0	1	1	1	1	0	0	0	0	0	0	0	NA	NA	NA	NA	NA	NA	NA	0	0	0	0	0	0	0
779	0	1	54	Spain	NA	NA	NA	NA	NA	NA	1	0	2020/3/15-2020/4/30	0	0	0	0	0	0	0	0	0	0	0	1	1	1	1	0	0	0	1	0	0	0	NA	NA	NA	NA	NA	NA	NA	0	0	0	0	0	0	0
780	0	1	54	Spain	NA	NA	NA	NA	NA	NA	1	0	2020/3/15-2020/4/30	0	0	0	0	0	0	0	0	0	0	0	1	1	1	1	0	0	0	0	0	0	0	NA	NA	NA	NA	NA	NA	NA	0	0	0	0	0	0	0
781	0	0	76	Spain	NA	NA	NA	NA	NA	NA	1	0	2020/3/15-2020/4/30	1	0	1	1	0	0	0	0	0	0	0	1	0	0	0	0	0	1	1	0	0	0	NA	NA	NA	NA	NA	NA	NA	0	0	0	0	0	0	0
782	0	1	49	Spain	NA	NA	NA	NA	NA	NA	1	0	2020/3/15-2020/4/30	0	0	0	0	0	0	0	0	0	0	0	1	1	0	0	0	0	0	1	0	0	0	NA	NA	NA	NA	NA	NA	NA	0	0	0	0	0	0	0
783	0	1	67	Spain	NA	NA	NA	NA	NA	NA	1	0	2020/3/15-2020/4/30	1	0	1	1	0	0	0	0	0	0	0	0	0	0	0	0	0	0	0	0	0	0	NA	NA	NA	NA	NA	NA	NA	0	0	0	0	0	0	0
784	0	0	82	Spain	NA	NA	NA	NA	NA	NA	1	0	2020/3/15-2020/4/30	1	0	0	1	0	0	0	0	0	0	0	1	1	0	1	0	0	0	0	0	0	0	NA	NA	NA	NA	NA	NA	NA	0	0	0	0	0	0	0
785	0	0	54	Spain	NA	NA	NA	NA	NA	NA	1	0	2020/3/15-2020/4/30	1	0	0	0	0	0	0	1	0	0	0	1	1	0	0	0	0	1	1	0	0	0	NA	NA	NA	NA	NA	NA	NA	0	0	0	0	0	0	0
786	0	0	63	Spain	NA	NA	NA	NA	NA	NA	1	0	2020/3/15-2020/4/30	0	0	0	0	0	0	0	0	0	0	0	1	1	1	1	0	0	0	0	0	0	0	NA	NA	NA	NA	NA	NA	NA	0	0	0	0	0	0	0
787	0	0	89	Spain	NA	NA	NA	NA	NA	NA	1	0	2020/3/15-2020/4/30	0	0	0	0	0	0	0	0	0	0	0	0	0	0	0	0	0	0	0	0	0	0	NA	NA	NA	NA	NA	NA	NA	0	0	0	0	0	0	0
788	0	1	74	Spain	NA	NA	NA	NA	NA	NA	1	0	2020/3/15-2020/4/30	1	0	1	0	0	0	0	0	0	0	0	1	1	1	1	0	0	1	0	0	0	0	NA	NA	NA	NA	NA	NA	NA	0	0	0	0	0	0	0
789	0	0	60	Spain	NA	NA	NA	NA	NA	NA	1	0	2020/3/15-2020/4/30	0	0	0	0	0	0	0	0	0	0	0	1	0	1	0	0	0	1	1	0	0	0	NA	NA	NA	NA	NA	NA	NA	0	0	0	0	0	0	0
790	0	1	89	Spain	NA	NA	NA	NA	NA	NA	1	0	2020/3/15-2020/4/30	0	0	0	0	0	0	0	0	0	0	0	0	0	0	0	0	0	0	0	0	0	0	NA	NA	NA	NA	NA	NA	NA	0	0	0	0	0	0	0
791	0	0	65	Spain	NA	NA	NA	NA	NA	NA	1	0	2020/3/15-2020/4/30	1	0	0	1	0	0	0	0	0	0	0	0	0	0	0	0	0	0	0	0	0	0	NA	NA	NA	NA	NA	NA	NA	0	0	0	0	0	0	0
792	0	0	102	Spain	NA	NA	NA	NA	NA	NA	1	0	2020/3/15-2020/4/30	1	0	0	1	0	0	0	0	0	0	0	1	1	1	0	0	0	1	1	0	0	0	NA	NA	NA	NA	NA	NA	NA	0	0	0	0	0	0	0
793	0	1	54	Spain	NA	NA	NA	NA	NA	NA	1	0	2020/3/15-2020/4/30	0	0	0	0	0	0	0	0	0	0	0	1	1	1	1	0	0	0	0	0	0	0	NA	NA	NA	NA	NA	NA	NA	0	0	0	0	0	0	0
794	0	1	54	Spain	NA	NA	NA	NA	NA	NA	1	0	2020/3/15-2020/4/30	1	0	0	1	0	0	0	0	0	0	0	1	1	0	1	0	0	0	0	0	0	0	NA	NA	NA	NA	NA	NA	NA	0	0	0	0	0	0	0
795	0	1	47	Spain	NA	NA	NA	NA	NA	NA	1	0	2020/3/15-2020/4/30	0	0	0	0	0	0	0	0	0	0	0	0	0	0	0	0	0	0	0	0	0	0	NA	NA	NA	NA	NA	NA	NA	0	0	0	0	0	0	0
796	0	0	81	Spain	NA	NA	NA	NA	NA	NA	1	0	2020/3/15-2020/4/30	1	0	1	1	0	0	0	0	0	0	0	1	1	1	0	0	0	1	0	0	0	0	NA	NA	NA	NA	NA	NA	NA	0	0	0	0	0	0	0
797	0	0	79	Spain	NA	NA	NA	NA	NA	NA	1	0	2020/3/15-2020/4/30	0	0	0	0	0	0	0	0	0	0	0	0	0	0	0	0	0	0	0	0	0	0	NA	NA	NA	NA	NA	NA	NA	0	0	0	0	0	0	0
798	0	1	61	Spain	NA	NA	NA	NA	NA	NA	1	0	2020/3/15-2020/4/30	0	0	0	0	0	0	0	0	0	0	0	1	0	1	1	0	0	0	0	0	0	0	NA	NA	NA	NA	NA	NA	NA	0	0	0	0	0	0	0
799	0	0	66	Spain	NA	NA	NA	NA	NA	NA	1	0	2020/3/15-2020/4/30	0	0	0	0	0	0	0	0	0	0	0	1	0	1	1	0	0	0	0	0	0	0	NA	NA	NA	NA	NA	NA	NA	0	0	0	0	0	0	0
800	0	1	77	Spain	NA	NA	NA	NA	NA	NA	1	0	2020/3/15-2020/4/30	1	0	0	1	0	0	0	0	0	0	0	1	1	0	1	0	0	0	0	0	0	0	NA	NA	NA	NA	NA	NA	NA	0	0	0	0	0	0	0
801	0	1	67	Spain	NA	NA	NA	NA	NA	NA	1	0	2020/3/15-2020/4/30	1	0	1	1	0	0	0	1	0	0	0	0	0	0	0	0	0	0	0	0	0	0	NA	NA	NA	NA	NA	NA	NA	0	0	0	0	0	0	0
802	0	0	65	Spain	NA	NA	NA	NA	NA	NA	1	0	2020/3/15-2020/4/30	0	0	0	0	0	0	0	0	0	0	0	1	1	1	0	0	0	0	1	0	0	0	NA	NA	NA	NA	NA	NA	NA	0	0	0	0	0	0	0
803	0	0	78	Spain	NA	NA	NA	NA	NA	NA	1	0	2020/3/15-2020/4/30	1	0	0	1	0	0	0	0	0	0	0	1	0	0	0	0	0	0	1	0	0	0	NA	NA	NA	NA	NA	NA	NA	0	0	0	0	0	0	0
804	0	0	83	Spain	NA	NA	NA	NA	NA	NA	1	0	2020/3/15-2020/4/30	1	0	1	1	0	0	0	0	0	0	0	0	0	0	0	0	0	0	0	0	0	0	NA	NA	NA	NA	NA	NA	NA	0	0	0	0	0	0	0
805	0	0	60	Spain	NA	NA	NA	NA	NA	NA	1	0	2020/3/15-2020/4/30	0	0	0	0	0	0	0	0	0	0	0	1	1	1	1	0	0	1	0	0	0	0	NA	NA	NA	NA	NA	NA	NA	0	0	0	0	0	0	0
806	0	0	72	Spain	NA	NA	NA	NA	NA	NA	1	0	2020/3/15-2020/4/30	1	0	0	1	0	0	0	0	0	0	0	1	0	1	1	0	0	1	0	0	0	0	NA	NA	NA	NA	NA	NA	NA	0	0	0	0	0	0	0
807	0	0	58	Spain	NA	NA	NA	NA	NA	NA	1	0	2020/3/15-2020/4/30	1	0	0	1	0	0	0	0	0	0	0	1	0	1	0	0	0	1	0	0	0	0	NA	NA	NA	NA	NA	NA	NA	0	0	0	0	0	0	0
808	0	0	89	Spain	NA	NA	NA	NA	NA	NA	1	0	2020/3/15-2020/4/30	0	0	0	0	0	0	0	0	0	0	0	1	1	0	1	0	0	0	0	0	0	0	NA	NA	NA	NA	NA	NA	NA	0	0	0	0	0	0	0
809	0	0	31	Spain	NA	NA	NA	NA	NA	NA	1	0	2020/3/15-2020/4/30	0	0	0	0	0	0	0	0	0	0	0	1	1	1	1	0	0	1	1	0	0	0	NA	NA	NA	NA	NA	NA	NA	0	0	0	0	0	0	0
810	0	0	74	Spain	NA	NA	NA	NA	NA	NA	1	0	2020/3/15-2020/4/30	1	0	1	1	0	0	0	0	0	0	0	0	0	0	0	0	0	0	0	0	0	0	NA	NA	NA	NA	NA	NA	NA	0	0	0	0	0	0	0
811	0	1	83	Spain	NA	NA	NA	NA	NA	NA	1	0	2020/3/15-2020/4/30	1	0	0	1	0	0	0	0	0	0	0	1	1	1	0	0	0	0	1	0	0	0	NA	NA	NA	NA	NA	NA	NA	0	0	0	0	0	0	0
812	0	1	61	Spain	NA	NA	NA	NA	NA	NA	1	0	2020/3/15-2020/4/30	0	0	0	0	0	0	0	0	0	0	0	1	1	0	0	0	0	0	0	0	0	0	NA	NA	NA	NA	NA	NA	NA	0	0	0	0	0	0	0
813	0	0	27	Spain	NA	NA	NA	NA	NA	NA	1	0	2020/3/15-2020/4/30	0	0	0	0	0	0	0	0	0	0	0	0	0	0	0	0	0	0	0	0	0	0	NA	NA	NA	NA	NA	NA	NA	0	0	0	0	0	0	0
814	0	1	34	Spain	NA	NA	NA	NA	NA	NA	1	0	2020/3/15-2020/4/30	0	0	0	0	0	0	0	0	0	0	0	1	1	1	1	0	0	0	0	0	0	0	NA	NA	NA	NA	NA	NA	NA	0	0	0	0	0	0	0
815	0	0	41	Spain	NA	NA	NA	NA	NA	NA	1	0	2020/3/15-2020/4/30	0	0	0	0	0	0	0	0	0	0	0	1	1	1	0	0	0	0	0	0	0	0	NA	NA	NA	NA	NA	NA	NA	0	0	0	0	0	0	0
816	0	1	79	Spain	NA	NA	NA	NA	NA	NA	1	0	2020/3/15-2020/4/30	0	0	0	0	0	0	0	0	0	0	0	1	1	0	1	0	0	0	0	0	0	0	NA	NA	NA	NA	NA	NA	NA	0	0	0	0	0	0	0
817	0	1	48	Spain	NA	NA	NA	NA	NA	NA	1	0	2020/3/15-2020/4/30	0	0	0	0	0	0	0	0	0	0	0	1	1	1	1	0	0	1	0	0	0	0	NA	NA	NA	NA	NA	NA	NA	0	0	0	0	0	0	0
818	0	1	75	Spain	NA	NA	NA	NA	NA	NA	1	0	2020/3/15-2020/4/30	1	0	1	0	0	0	0	0	0	0	0	1	1	1	1	0	0	1	1	0	0	0	NA	NA	NA	NA	NA	NA	NA	0	0	0	0	0	0	0
819	0	1	41	Spain	NA	NA	NA	NA	NA	NA	1	0	2020/3/15-2020/4/30	1	0	0	1	0	0	0	0	0	0	0	1	1	1	1	0	0	0	1	0	0	0	NA	NA	NA	NA	NA	NA	NA	0	0	0	0	0	0	0
820	0	1	32	Spain	NA	NA	NA	NA	NA	NA	1	0	2020/3/15-2020/4/30	0	0	0	0	0	0	0	0	0	0	0	1	1	0	1	0	0	0	0	0	0	0	NA	NA	NA	NA	NA	NA	NA	0	0	0	0	0	0	0
821	0	0	72	Spain	NA	NA	NA	NA	NA	NA	1	0	2020/3/15-2020/4/30	0	0	0	0	0	0	0	0	0	0	0	1	1	1	1	0	0	0	0	0	0	0	NA	NA	NA	NA	NA	NA	NA	0	0	0	0	0	0	0
822	0	1	67	Spain	NA	NA	NA	NA	NA	NA	1	0	2020/3/15-2020/4/30	0	0	0	0	0	0	0	0	0	0	0	1	1	0	0	0	0	0	1	0	0	0	NA	NA	NA	NA	NA	NA	NA	0	0	0	0	0	0	0
823	0	0	68	Spain	NA	NA	NA	NA	NA	NA	1	0	2020/3/15-2020/4/30	1	0	0	1	0	0	0	0	0	0	0	1	1	1	1	0	0	0	1	0	0	0	NA	NA	NA	NA	NA	NA	NA	0	0	0	0	0	0	0
824	0	1	53	Mexico	NA	NA	NA	NA	NA	NA	0	0	2020/4/17-2020/5/8	1	0	1	0	0	0	0	0	0	0	0	NA	NA	NA	NA	NA	NA	NA	NA	NA	NA	NA	NA	NA	NA	NA	NA	NA	NA	NA	NA	NA	NA	NA	NA	NA
825	0	1	64	Mexico	NA	NA	NA	NA	NA	NA	0	0	2020/4/17-2020/5/8	1	1	0	0	0	0	0	0	0	0	0	NA	NA	NA	NA	NA	NA	NA	NA	NA	NA	NA	NA	NA	NA	NA	NA	NA	NA	NA	NA	NA	NA	NA	NA	NA
826	0	1	38	Mexico	NA	NA	NA	NA	NA	NA	0	0	2020/4/17-2020/5/8	1	0	1	0	0	0	0	0	0	0	0	NA	NA	NA	NA	NA	NA	NA	NA	NA	NA	NA	NA	NA	NA	NA	NA	NA	NA	NA	NA	NA	NA	NA	NA	NA
827	0	0	65	Romania	NA	NA	NA	NA	NA	NA	1	0	2020/4/1-2020/5/15	1	0	1	1	0	0	0	0	0	0	0	NA	NA	NA	NA	NA	NA	NA	NA	NA	NA	NA	NA	NA	NA	NA	NA	NA	NA	1	0	0	0	0	0	1
828	0	1	61	Romania	NA	NA	NA	NA	NA	NA	0	0	2020/4/1-2020/5/15	1	0	1	0	0	0	0	0	0	0	0	NA	NA	NA	NA	NA	NA	NA	NA	NA	NA	NA	NA	NA	NA	NA	NA	NA	NA	1	0	0	0	0	0	1
829	0	0	60	America	NA	2020-03-23	2020-05-15	NA	54	NA	NA	NA	before 2020/5/26	NA	NA	NA	NA	NA	NA	NA	NA	NA	NA	NA	1	0	0	1	0	0	0	0	0	0	0	NA	NA	NA	NA	NA	NA	NA	NA	NA	NA	NA	NA	NA	NA
830	0	1	24	America	NA	2020-04-06	2020-06-21	NA	77	NA	NA	NA	before 2020/7/4	NA	NA	NA	NA	NA	NA	NA	NA	NA	NA	NA	1	1	1	1	0	0	1	0	0	0	0	NA	NA	NA	NA	NA	NA	NA	NA	NA	NA	NA	NA	NA	NA
831	0	1	20	America	NA	NA	NA	NA	NA	NA	NA	NA	before 2020/7/11	NA	NA	NA	NA	NA	NA	NA	NA	NA	NA	NA	1	1	1	0	1	0	0	0	0	0	0	NA	NA	NA	NA	NA	NA	NA	NA	NA	NA	NA	NA	NA	NA
832	0	0	28	America	NA	NA	NA	NA	NA	NA	NA	NA	before 2020/7/11	NA	NA	NA	NA	NA	NA	NA	NA	NA	NA	NA	1	0	0	0	1	0	0	0	1	0	1	NA	NA	NA	NA	NA	NA	NA	NA	NA	NA	NA	NA	NA	NA
833	0	0	28	America	NA	NA	NA	NA	NA	NA	NA	NA	before 2020/7/11	NA	NA	NA	NA	NA	NA	NA	NA	NA	NA	NA	1	0	0	1	1	0	0	0	0	0	0	NA	NA	NA	NA	NA	NA	NA	NA	NA	NA	NA	NA	NA	NA
834	0	0	24	America	NA	NA	NA	NA	NA	NA	NA	NA	before 2020/7/11	NA	NA	NA	NA	NA	NA	NA	NA	NA	NA	NA	1	0	0	0	0	0	0	0	0	0	1	NA	NA	NA	NA	NA	NA	NA	NA	NA	NA	NA	NA	NA	NA
835	0	0	21	America	NA	NA	NA	NA	NA	NA	NA	NA	before 2020/7/11	NA	NA	NA	NA	NA	NA	NA	NA	NA	NA	NA	1	1	0	0	1	0	1	0	0	0	0	NA	NA	NA	NA	NA	NA	NA	NA	NA	NA	NA	NA	NA	NA
836	0	0	25	America	NA	NA	NA	NA	NA	NA	NA	NA	before 2020/7/11	NA	NA	NA	NA	NA	NA	NA	NA	NA	NA	NA	1	1	0	0	1	0	0	0	0	0	0	NA	NA	NA	NA	NA	NA	NA	NA	NA	NA	NA	NA	NA	NA
837	0	1	25	America	NA	NA	NA	NA	NA	NA	NA	NA	before 2020/7/11	NA	NA	NA	NA	NA	NA	NA	NA	NA	NA	NA	1	1	0	0	1	0	0	0	0	0	0	NA	NA	NA	NA	NA	NA	NA	NA	NA	NA	NA	NA	NA	NA
838	0	1	28	America	NA	NA	NA	NA	NA	NA	NA	NA	before 2020/7/11	NA	NA	NA	NA	NA	NA	NA	NA	NA	NA	NA	1	0	0	1	1	0	1	0	0	0	0	NA	NA	NA	NA	NA	NA	NA	NA	NA	NA	NA	NA	NA	NA
839	0	0	20	America	NA	NA	NA	NA	NA	NA	NA	NA	before 2020/7/11	NA	NA	NA	NA	NA	NA	NA	NA	NA	NA	NA	1	1	1	0	0	0	0	0	0	0	0	NA	NA	NA	NA	NA	NA	NA	NA	NA	NA	NA	NA	NA	NA
840	0	0	51	America	NA	NA	NA	NA	14	NA	0	1	before 2020/4/5	NA	NA	NA	NA	NA	NA	NA	NA	NA	NA	NA	1	1	1	1	1	0	1	0	0	1	1	1	0	0	0	0	0	0	NA	NA	NA	NA	NA	NA	NA
841	0	1	61	America	NA	NA	NA	NA	16	NA	0	0	before 2020/7/10	NA	NA	NA	NA	NA	NA	NA	NA	NA	NA	NA	1	1	1	1	0	0	0	1	0	0	0	1	0	0	0	1	0	0	NA	NA	NA	NA	NA	NA	NA
842	0	0	64	America	NA	NA	NA	NA	NA	NA	0	0	before 2020/6/10	NA	NA	NA	NA	NA	NA	NA	NA	NA	NA	NA	1	0	0	1	0	0	0	0	0	0	0	1	0	0	0	0	0	0	NA	NA	NA	NA	NA	NA	NA
843	0	1	55	America	NA	NA	NA	5	NA	NA	0	0	before 2020/6/10	NA	NA	NA	NA	NA	NA	NA	NA	NA	NA	NA	1	1	1	0	0	0	1	1	0	1	0	1	0	0	0	0	0	0	NA	NA	NA	NA	NA	NA	NA
844	0	1	53	America	NA	NA	NA	4	36	40	0	0	before 2020/6/10	NA	NA	NA	NA	NA	NA	NA	NA	NA	NA	NA	1	1	1	1	1	1	0	0	0	0	1	1	0	0	0	0	0	0	NA	NA	NA	NA	NA	NA	NA
845	0	1	55	America	NA	NA	NA	21	7	28	0	0	before 2020/5/15	NA	NA	NA	NA	NA	NA	NA	NA	NA	NA	NA	1	1	1	0	0	0	0	0	0	0	0	1	0	0	0	0	0	0	NA	NA	NA	NA	NA	NA	NA
846	0	1	29	Belgium	2020-05-15	NA	NA	NA	NA	NA	NA	NA	before 2020/8/14	NA	NA	NA	NA	NA	NA	NA	NA	NA	NA	NA	1	0	0	0	1	0	0	0	1	0	0	NA	NA	NA	NA	NA	NA	NA	NA	NA	NA	NA	NA	NA	NA
847	0	1	28	Belgium	2020-05-16	NA	NA	NA	NA	NA	NA	NA	before 2020/8/14	NA	NA	NA	NA	NA	NA	NA	NA	NA	NA	NA	1	0	0	0	0	0	0	0	0	0	0	NA	NA	NA	NA	NA	NA	NA	NA	NA	NA	NA	NA	NA	NA
848	0	1	78	Canada	2020-03-22	2020-03-25	2020-05-05	4	42	45	0	0	before 2020/5/28	NA	NA	NA	NA	NA	NA	NA	NA	NA	NA	NA	1	0	0	1	1	0	0	0	0	0	0	1	0	0	0	0	0	0	NA	NA	NA	NA	NA	NA	NA
849	0	1	73	France	NA	NA	NA	NA	13	NA	0	0	2020/4/6-2020/5/14	NA	NA	NA	NA	NA	NA	NA	NA	NA	NA	NA	1	1	0	0	1	0	0	0	0	0	0	NA	NA	NA	NA	NA	NA	NA	NA	NA	NA	NA	NA	NA	NA
850	0	1	39	France	2020-02-21	2020-02-26	2020-03-16	6	20	25	0	1	before 2020/5/12	NA	NA	NA	NA	NA	NA	NA	NA	NA	NA	NA	1	1	1	0	0	0	0	0	0	0	0	NA	NA	NA	NA	NA	NA	NA	1	1	0	0	0	0	0
851	0	1	52	Italy	NA	NA	NA	7	NA	NA	0	0	before 2020/5/24	NA	NA	NA	NA	NA	NA	NA	NA	NA	NA	NA	1	1	1	0	0	1	0	0	1	0	0	NA	NA	NA	NA	NA	NA	NA	NA	NA	NA	NA	NA	NA	NA
852	0	1	43	Mexico	NA	NA	NA	NA	NA	NA	0	0	2020/4/17-2020/5/8	NA	NA	NA	NA	NA	NA	NA	NA	NA	NA	NA	1	0	0	1	0	0	0	0	0	0	0	NA	NA	NA	NA	NA	NA	NA	NA	NA	NA	NA	NA	NA	NA
853	0	1	46	Mexico	NA	NA	NA	NA	NA	NA	0	0	2020/4/17-2020/5/8	NA	NA	NA	NA	NA	NA	NA	NA	NA	NA	NA	1	0	0	1	0	0	0	0	0	0	0	NA	NA	NA	NA	NA	NA	NA	NA	NA	NA	NA	NA	NA	NA
854	0	0	48	Romania	NA	NA	NA	NA	NA	NA	0	0	2020/4/1-2020/5/15	NA	NA	NA	NA	NA	NA	NA	NA	NA	NA	NA	1	0	0	0	0	0	0	0	1	0	0	NA	NA	NA	NA	NA	NA	NA	1	0	0	0	0	0	1
855	0	1	53	Spain	2020-03-15	2020-03-29	2020-04-06	15	9	23	NA	NA	before 2020/7/1	NA	NA	NA	NA	NA	NA	NA	NA	NA	NA	NA	1	1	0	1	0	0	0	0	0	0	0	NA	NA	NA	NA	NA	NA	NA	NA	NA	NA	NA	NA	NA	NA
856	0	1	70	America	NA	2020-03-04	2020-05-04	NA	62	NA	NA	NA	2020-05-04	NA	NA	NA	NA	NA	NA	NA	NA	NA	NA	NA	NA	NA	NA	NA	NA	NA	NA	NA	NA	NA	NA	NA	NA	NA	NA	NA	NA	NA	NA	NA	NA	NA	NA	NA	NA
857	0	0	60	America	NA	2020-03-20	2020-05-19	NA	61	NA	NA	NA	before 2020/5/21	NA	NA	NA	NA	NA	NA	NA	NA	NA	NA	NA	NA	NA	NA	NA	NA	NA	NA	NA	NA	NA	NA	NA	NA	NA	NA	NA	NA	NA	NA	NA	NA	NA	NA	NA	NA
858	0	1	44	America	NA	NA	NA	NA	NA	3	NA	NA	before 2020/9/10	NA	NA	NA	NA	NA	NA	NA	NA	NA	NA	NA	NA	NA	NA	NA	NA	NA	NA	NA	NA	NA	NA	NA	NA	NA	NA	NA	NA	NA	NA	NA	NA	NA	NA	NA	NA
859	0	1	54	America	NA	NA	NA	NA	NA	13	NA	NA	before 2020/9/10	NA	NA	NA	NA	NA	NA	NA	NA	NA	NA	NA	NA	NA	NA	NA	NA	NA	NA	NA	NA	NA	NA	NA	NA	NA	NA	NA	NA	NA	NA	NA	NA	NA	NA	NA	NA
860	0	1	36	America	NA	NA	NA	NA	NA	7	NA	NA	before 2020/9/10	NA	NA	NA	NA	NA	NA	NA	NA	NA	NA	NA	NA	NA	NA	NA	NA	NA	NA	NA	NA	NA	NA	NA	NA	NA	NA	NA	NA	NA	NA	NA	NA	NA	NA	NA	NA
861	0	0	54	America	NA	NA	NA	NA	NA	18	NA	NA	before 2020/9/10	NA	NA	NA	NA	NA	NA	NA	NA	NA	NA	NA	NA	NA	NA	NA	NA	NA	NA	NA	NA	NA	NA	NA	NA	NA	NA	NA	NA	NA	NA	NA	NA	NA	NA	NA	NA
862	0	0	38	America	NA	NA	NA	NA	NA	12	NA	NA	before 2020/9/10	NA	NA	NA	NA	NA	NA	NA	NA	NA	NA	NA	NA	NA	NA	NA	NA	NA	NA	NA	NA	NA	NA	NA	NA	NA	NA	NA	NA	NA	NA	NA	NA	NA	NA	NA	NA
863	0	0	67	America	NA	NA	NA	NA	NA	11	NA	NA	before 2020/9/10	NA	NA	NA	NA	NA	NA	NA	NA	NA	NA	NA	NA	NA	NA	NA	NA	NA	NA	NA	NA	NA	NA	NA	NA	NA	NA	NA	NA	NA	NA	NA	NA	NA	NA	NA	NA
864	0	0	46	America	NA	NA	NA	NA	NA	16	NA	NA	before 2020/9/10	NA	NA	NA	NA	NA	NA	NA	NA	NA	NA	NA	NA	NA	NA	NA	NA	NA	NA	NA	NA	NA	NA	NA	NA	NA	NA	NA	NA	NA	NA	NA	NA	NA	NA	NA	NA
865	0	0	43	America	NA	NA	NA	NA	NA	11	NA	NA	before 2020/9/10	NA	NA	NA	NA	NA	NA	NA	NA	NA	NA	NA	NA	NA	NA	NA	NA	NA	NA	NA	NA	NA	NA	NA	NA	NA	NA	NA	NA	NA	NA	NA	NA	NA	NA	NA	NA
866	0	0	47	America	NA	NA	NA	NA	NA	13	NA	NA	before 2020/9/10	NA	NA	NA	NA	NA	NA	NA	NA	NA	NA	NA	NA	NA	NA	NA	NA	NA	NA	NA	NA	NA	NA	NA	NA	NA	NA	NA	NA	NA	NA	NA	NA	NA	NA	NA	NA
867	0	0	41	America	NA	NA	NA	NA	NA	2	NA	NA	before 2020/9/10	NA	NA	NA	NA	NA	NA	NA	NA	NA	NA	NA	NA	NA	NA	NA	NA	NA	NA	NA	NA	NA	NA	NA	NA	NA	NA	NA	NA	NA	NA	NA	NA	NA	NA	NA	NA
868	0	1	23	America	NA	NA	NA	NA	NA	12	NA	NA	before 2020/9/10	NA	NA	NA	NA	NA	NA	NA	NA	NA	NA	NA	NA	NA	NA	NA	NA	NA	NA	NA	NA	NA	NA	NA	NA	NA	NA	NA	NA	NA	NA	NA	NA	NA	NA	NA	NA
869	0	0	66	America	NA	NA	NA	NA	NA	6	NA	NA	before 2020/9/10	NA	NA	NA	NA	NA	NA	NA	NA	NA	NA	NA	NA	NA	NA	NA	NA	NA	NA	NA	NA	NA	NA	NA	NA	NA	NA	NA	NA	NA	NA	NA	NA	NA	NA	NA	NA
870	0	1	65	America	NA	NA	NA	NA	NA	11	NA	NA	before 2020/9/10	NA	NA	NA	NA	NA	NA	NA	NA	NA	NA	NA	NA	NA	NA	NA	NA	NA	NA	NA	NA	NA	NA	NA	NA	NA	NA	NA	NA	NA	NA	NA	NA	NA	NA	NA	NA
871	0	1	50	America	NA	NA	NA	NA	NA	14	NA	NA	before 2020/9/10	NA	NA	NA	NA	NA	NA	NA	NA	NA	NA	NA	NA	NA	NA	NA	NA	NA	NA	NA	NA	NA	NA	NA	NA	NA	NA	NA	NA	NA	NA	NA	NA	NA	NA	NA	NA
872	0	1	52	America	NA	NA	NA	NA	NA	12	NA	NA	before 2020/9/10	NA	NA	NA	NA	NA	NA	NA	NA	NA	NA	NA	NA	NA	NA	NA	NA	NA	NA	NA	NA	NA	NA	NA	NA	NA	NA	NA	NA	NA	NA	NA	NA	NA	NA	NA	NA
873	0	0	23	America	NA	NA	NA	NA	NA	9	NA	NA	before 2020/9/10	NA	NA	NA	NA	NA	NA	NA	NA	NA	NA	NA	NA	NA	NA	NA	NA	NA	NA	NA	NA	NA	NA	NA	NA	NA	NA	NA	NA	NA	NA	NA	NA	NA	NA	NA	NA
874	0	0	57	America	NA	NA	NA	NA	NA	12	NA	NA	before 2020/9/10	NA	NA	NA	NA	NA	NA	NA	NA	NA	NA	NA	NA	NA	NA	NA	NA	NA	NA	NA	NA	NA	NA	NA	NA	NA	NA	NA	NA	NA	NA	NA	NA	NA	NA	NA	NA
875	0	1	41	America	NA	NA	NA	NA	NA	7	NA	NA	before 2020/9/10	NA	NA	NA	NA	NA	NA	NA	NA	NA	NA	NA	NA	NA	NA	NA	NA	NA	NA	NA	NA	NA	NA	NA	NA	NA	NA	NA	NA	NA	NA	NA	NA	NA	NA	NA	NA
876	0	0	50	America	NA	NA	NA	NA	NA	16	NA	NA	before 2020/9/10	NA	NA	NA	NA	NA	NA	NA	NA	NA	NA	NA	NA	NA	NA	NA	NA	NA	NA	NA	NA	NA	NA	NA	NA	NA	NA	NA	NA	NA	NA	NA	NA	NA	NA	NA	NA
877	0	0	27	America	NA	NA	NA	NA	NA	17	NA	NA	before 2020/9/10	NA	NA	NA	NA	NA	NA	NA	NA	NA	NA	NA	NA	NA	NA	NA	NA	NA	NA	NA	NA	NA	NA	NA	NA	NA	NA	NA	NA	NA	NA	NA	NA	NA	NA	NA	NA
878	0	1	29	America	NA	NA	NA	NA	NA	10	NA	NA	before 2020/9/10	NA	NA	NA	NA	NA	NA	NA	NA	NA	NA	NA	NA	NA	NA	NA	NA	NA	NA	NA	NA	NA	NA	NA	NA	NA	NA	NA	NA	NA	NA	NA	NA	NA	NA	NA	NA
879	0	1	61	America	NA	NA	NA	NA	NA	14	NA	NA	before 2020/9/10	NA	NA	NA	NA	NA	NA	NA	NA	NA	NA	NA	NA	NA	NA	NA	NA	NA	NA	NA	NA	NA	NA	NA	NA	NA	NA	NA	NA	NA	NA	NA	NA	NA	NA	NA	NA
880	0	0	44	America	NA	NA	NA	NA	NA	6	NA	NA	before 2020/9/10	NA	NA	NA	NA	NA	NA	NA	NA	NA	NA	NA	NA	NA	NA	NA	NA	NA	NA	NA	NA	NA	NA	NA	NA	NA	NA	NA	NA	NA	NA	NA	NA	NA	NA	NA	NA
881	0	0	49	America	NA	NA	NA	NA	NA	6	NA	NA	before 2020/9/10	NA	NA	NA	NA	NA	NA	NA	NA	NA	NA	NA	NA	NA	NA	NA	NA	NA	NA	NA	NA	NA	NA	NA	NA	NA	NA	NA	NA	NA	NA	NA	NA	NA	NA	NA	NA
882	0	0	37	America	NA	NA	NA	NA	NA	19	NA	NA	before 2020/9/10	NA	NA	NA	NA	NA	NA	NA	NA	NA	NA	NA	NA	NA	NA	NA	NA	NA	NA	NA	NA	NA	NA	NA	NA	NA	NA	NA	NA	NA	NA	NA	NA	NA	NA	NA	NA
883	0	0	42	America	NA	NA	NA	NA	NA	18	NA	NA	before 2020/9/10	NA	NA	NA	NA	NA	NA	NA	NA	NA	NA	NA	NA	NA	NA	NA	NA	NA	NA	NA	NA	NA	NA	NA	NA	NA	NA	NA	NA	NA	NA	NA	NA	NA	NA	NA	NA
884	0	1	33	America	NA	NA	NA	NA	NA	3	NA	NA	before 2020/9/10	NA	NA	NA	NA	NA	NA	NA	NA	NA	NA	NA	NA	NA	NA	NA	NA	NA	NA	NA	NA	NA	NA	NA	NA	NA	NA	NA	NA	NA	NA	NA	NA	NA	NA	NA	NA
885	0	0	54	America	NA	NA	NA	NA	NA	1	NA	NA	before 2020/9/10	NA	NA	NA	NA	NA	NA	NA	NA	NA	NA	NA	NA	NA	NA	NA	NA	NA	NA	NA	NA	NA	NA	NA	NA	NA	NA	NA	NA	NA	NA	NA	NA	NA	NA	NA	NA
886	0	0	47	America	NA	NA	NA	NA	NA	1	NA	NA	before 2020/9/10	NA	NA	NA	NA	NA	NA	NA	NA	NA	NA	NA	NA	NA	NA	NA	NA	NA	NA	NA	NA	NA	NA	NA	NA	NA	NA	NA	NA	NA	NA	NA	NA	NA	NA	NA	NA
887	0	0	52	America	NA	NA	NA	NA	NA	9	NA	NA	before 2020/9/10	NA	NA	NA	NA	NA	NA	NA	NA	NA	NA	NA	NA	NA	NA	NA	NA	NA	NA	NA	NA	NA	NA	NA	NA	NA	NA	NA	NA	NA	NA	NA	NA	NA	NA	NA	NA
888	0	1	27	America	NA	NA	NA	NA	NA	16	NA	NA	before 2020/9/10	NA	NA	NA	NA	NA	NA	NA	NA	NA	NA	NA	NA	NA	NA	NA	NA	NA	NA	NA	NA	NA	NA	NA	NA	NA	NA	NA	NA	NA	NA	NA	NA	NA	NA	NA	NA
889	0	0	27	America	NA	NA	NA	NA	NA	10	NA	NA	before 2020/9/10	NA	NA	NA	NA	NA	NA	NA	NA	NA	NA	NA	NA	NA	NA	NA	NA	NA	NA	NA	NA	NA	NA	NA	NA	NA	NA	NA	NA	NA	NA	NA	NA	NA	NA	NA	NA
890	0	0	50	America	NA	NA	NA	NA	NA	15	NA	NA	before 2020/9/10	NA	NA	NA	NA	NA	NA	NA	NA	NA	NA	NA	NA	NA	NA	NA	NA	NA	NA	NA	NA	NA	NA	NA	NA	NA	NA	NA	NA	NA	NA	NA	NA	NA	NA	NA	NA
891	0	0	35	America	NA	NA	NA	NA	NA	6	NA	NA	before 2020/9/10	NA	NA	NA	NA	NA	NA	NA	NA	NA	NA	NA	NA	NA	NA	NA	NA	NA	NA	NA	NA	NA	NA	NA	NA	NA	NA	NA	NA	NA	NA	NA	NA	NA	NA	NA	NA
892	0	0	41	America	NA	NA	NA	NA	NA	3	NA	NA	before 2020/9/10	NA	NA	NA	NA	NA	NA	NA	NA	NA	NA	NA	NA	NA	NA	NA	NA	NA	NA	NA	NA	NA	NA	NA	NA	NA	NA	NA	NA	NA	NA	NA	NA	NA	NA	NA	NA
893	0	0	51	America	NA	NA	NA	NA	NA	7	NA	NA	before 2020/9/10	NA	NA	NA	NA	NA	NA	NA	NA	NA	NA	NA	NA	NA	NA	NA	NA	NA	NA	NA	NA	NA	NA	NA	NA	NA	NA	NA	NA	NA	NA	NA	NA	NA	NA	NA	NA
894	0	1	51	America	NA	NA	NA	NA	NA	4	NA	NA	before 2020/9/10	NA	NA	NA	NA	NA	NA	NA	NA	NA	NA	NA	NA	NA	NA	NA	NA	NA	NA	NA	NA	NA	NA	NA	NA	NA	NA	NA	NA	NA	NA	NA	NA	NA	NA	NA	NA
895	0	0	47	America	NA	NA	NA	NA	NA	12	NA	NA	before 2020/9/10	NA	NA	NA	NA	NA	NA	NA	NA	NA	NA	NA	NA	NA	NA	NA	NA	NA	NA	NA	NA	NA	NA	NA	NA	NA	NA	NA	NA	NA	NA	NA	NA	NA	NA	NA	NA
896	0	0	53	America	NA	NA	NA	NA	NA	8	NA	NA	before 2020/9/10	NA	NA	NA	NA	NA	NA	NA	NA	NA	NA	NA	NA	NA	NA	NA	NA	NA	NA	NA	NA	NA	NA	NA	NA	NA	NA	NA	NA	NA	NA	NA	NA	NA	NA	NA	NA
897	0	0	49	America	NA	NA	NA	NA	NA	10	NA	NA	before 2020/9/10	NA	NA	NA	NA	NA	NA	NA	NA	NA	NA	NA	NA	NA	NA	NA	NA	NA	NA	NA	NA	NA	NA	NA	NA	NA	NA	NA	NA	NA	NA	NA	NA	NA	NA	NA	NA
898	0	1	48	America	NA	NA	NA	NA	NA	15	NA	NA	before 2020/9/10	NA	NA	NA	NA	NA	NA	NA	NA	NA	NA	NA	NA	NA	NA	NA	NA	NA	NA	NA	NA	NA	NA	NA	NA	NA	NA	NA	NA	NA	NA	NA	NA	NA	NA	NA	NA
899	0	1	59	America	NA	NA	NA	NA	NA	6	NA	NA	before 2020/9/10	NA	NA	NA	NA	NA	NA	NA	NA	NA	NA	NA	NA	NA	NA	NA	NA	NA	NA	NA	NA	NA	NA	NA	NA	NA	NA	NA	NA	NA	NA	NA	NA	NA	NA	NA	NA
900	0	1	33	America	NA	NA	NA	NA	NA	10	NA	NA	before 2020/9/10	NA	NA	NA	NA	NA	NA	NA	NA	NA	NA	NA	NA	NA	NA	NA	NA	NA	NA	NA	NA	NA	NA	NA	NA	NA	NA	NA	NA	NA	NA	NA	NA	NA	NA	NA	NA
901	0	0	51	America	NA	NA	NA	NA	NA	9	NA	NA	before 2020/9/10	NA	NA	NA	NA	NA	NA	NA	NA	NA	NA	NA	NA	NA	NA	NA	NA	NA	NA	NA	NA	NA	NA	NA	NA	NA	NA	NA	NA	NA	NA	NA	NA	NA	NA	NA	NA
902	0	1	32	America	NA	NA	NA	NA	NA	21	NA	NA	before 2020/9/10	NA	NA	NA	NA	NA	NA	NA	NA	NA	NA	NA	NA	NA	NA	NA	NA	NA	NA	NA	NA	NA	NA	NA	NA	NA	NA	NA	NA	NA	NA	NA	NA	NA	NA	NA	NA
903	0	1	40	America	NA	NA	NA	NA	NA	12	NA	NA	before 2020/9/10	NA	NA	NA	NA	NA	NA	NA	NA	NA	NA	NA	NA	NA	NA	NA	NA	NA	NA	NA	NA	NA	NA	NA	NA	NA	NA	NA	NA	NA	NA	NA	NA	NA	NA	NA	NA
904	0	1	51	America	NA	NA	NA	NA	NA	14	NA	NA	before 2020/9/10	NA	NA	NA	NA	NA	NA	NA	NA	NA	NA	NA	NA	NA	NA	NA	NA	NA	NA	NA	NA	NA	NA	NA	NA	NA	NA	NA	NA	NA	NA	NA	NA	NA	NA	NA	NA
905	0	1	56	America	NA	NA	NA	NA	NA	8	NA	NA	before 2020/9/10	NA	NA	NA	NA	NA	NA	NA	NA	NA	NA	NA	NA	NA	NA	NA	NA	NA	NA	NA	NA	NA	NA	NA	NA	NA	NA	NA	NA	NA	NA	NA	NA	NA	NA	NA	NA
906	0	1	40	America	NA	NA	NA	NA	NA	14	NA	NA	before 2020/9/10	NA	NA	NA	NA	NA	NA	NA	NA	NA	NA	NA	NA	NA	NA	NA	NA	NA	NA	NA	NA	NA	NA	NA	NA	NA	NA	NA	NA	NA	NA	NA	NA	NA	NA	NA	NA
907	0	1	44	America	NA	NA	NA	NA	NA	5	NA	NA	before 2020/9/10	NA	NA	NA	NA	NA	NA	NA	NA	NA	NA	NA	NA	NA	NA	NA	NA	NA	NA	NA	NA	NA	NA	NA	NA	NA	NA	NA	NA	NA	NA	NA	NA	NA	NA	NA	NA
908	0	0	36	America	NA	NA	NA	NA	NA	16	NA	NA	before 2020/9/10	NA	NA	NA	NA	NA	NA	NA	NA	NA	NA	NA	NA	NA	NA	NA	NA	NA	NA	NA	NA	NA	NA	NA	NA	NA	NA	NA	NA	NA	NA	NA	NA	NA	NA	NA	NA
909	0	0	53	America	NA	NA	NA	NA	NA	11	NA	NA	before 2020/9/10	NA	NA	NA	NA	NA	NA	NA	NA	NA	NA	NA	NA	NA	NA	NA	NA	NA	NA	NA	NA	NA	NA	NA	NA	NA	NA	NA	NA	NA	NA	NA	NA	NA	NA	NA	NA
910	0	1	78	America	NA	NA	NA	NA	NA	16	NA	NA	before 2020/9/10	NA	NA	NA	NA	NA	NA	NA	NA	NA	NA	NA	NA	NA	NA	NA	NA	NA	NA	NA	NA	NA	NA	NA	NA	NA	NA	NA	NA	NA	NA	NA	NA	NA	NA	NA	NA
911	0	1	56	America	NA	NA	NA	NA	NA	7	NA	NA	before 2020/9/10	NA	NA	NA	NA	NA	NA	NA	NA	NA	NA	NA	NA	NA	NA	NA	NA	NA	NA	NA	NA	NA	NA	NA	NA	NA	NA	NA	NA	NA	NA	NA	NA	NA	NA	NA	NA
912	0	0	37	America	NA	NA	NA	NA	NA	9	NA	NA	before 2020/9/10	NA	NA	NA	NA	NA	NA	NA	NA	NA	NA	NA	NA	NA	NA	NA	NA	NA	NA	NA	NA	NA	NA	NA	NA	NA	NA	NA	NA	NA	NA	NA	NA	NA	NA	NA	NA
913	0	1	41	America	NA	NA	NA	NA	NA	21	NA	NA	before 2020/9/10	NA	NA	NA	NA	NA	NA	NA	NA	NA	NA	NA	NA	NA	NA	NA	NA	NA	NA	NA	NA	NA	NA	NA	NA	NA	NA	NA	NA	NA	NA	NA	NA	NA	NA	NA	NA
914	0	1	52	America	NA	NA	NA	NA	NA	14	NA	NA	before 2020/9/10	NA	NA	NA	NA	NA	NA	NA	NA	NA	NA	NA	NA	NA	NA	NA	NA	NA	NA	NA	NA	NA	NA	NA	NA	NA	NA	NA	NA	NA	NA	NA	NA	NA	NA	NA	NA
915	0	1	44	America	NA	NA	NA	NA	NA	14	NA	NA	before 2020/9/10	NA	NA	NA	NA	NA	NA	NA	NA	NA	NA	NA	NA	NA	NA	NA	NA	NA	NA	NA	NA	NA	NA	NA	NA	NA	NA	NA	NA	NA	NA	NA	NA	NA	NA	NA	NA
916	0	0	50	America	NA	NA	NA	NA	NA	2	NA	NA	before 2020/9/10	NA	NA	NA	NA	NA	NA	NA	NA	NA	NA	NA	NA	NA	NA	NA	NA	NA	NA	NA	NA	NA	NA	NA	NA	NA	NA	NA	NA	NA	NA	NA	NA	NA	NA	NA	NA
917	0	0	43	America	NA	NA	NA	NA	NA	12	NA	NA	before 2020/9/10	NA	NA	NA	NA	NA	NA	NA	NA	NA	NA	NA	NA	NA	NA	NA	NA	NA	NA	NA	NA	NA	NA	NA	NA	NA	NA	NA	NA	NA	NA	NA	NA	NA	NA	NA	NA
918	0	1	46	America	NA	NA	NA	NA	NA	29	NA	NA	before 2020/9/10	NA	NA	NA	NA	NA	NA	NA	NA	NA	NA	NA	NA	NA	NA	NA	NA	NA	NA	NA	NA	NA	NA	NA	NA	NA	NA	NA	NA	NA	NA	NA	NA	NA	NA	NA	NA
919	0	1	59	America	NA	NA	NA	NA	NA	13	NA	NA	before 2020/9/10	NA	NA	NA	NA	NA	NA	NA	NA	NA	NA	NA	NA	NA	NA	NA	NA	NA	NA	NA	NA	NA	NA	NA	NA	NA	NA	NA	NA	NA	NA	NA	NA	NA	NA	NA	NA
920	0	1	53	America	NA	NA	NA	NA	NA	16	NA	NA	before 2020/9/10	NA	NA	NA	NA	NA	NA	NA	NA	NA	NA	NA	NA	NA	NA	NA	NA	NA	NA	NA	NA	NA	NA	NA	NA	NA	NA	NA	NA	NA	NA	NA	NA	NA	NA	NA	NA
921	0	1	50	America	NA	NA	NA	NA	NA	14	NA	NA	before 2020/9/10	NA	NA	NA	NA	NA	NA	NA	NA	NA	NA	NA	NA	NA	NA	NA	NA	NA	NA	NA	NA	NA	NA	NA	NA	NA	NA	NA	NA	NA	NA	NA	NA	NA	NA	NA	NA
922	0	1	50	America	NA	NA	NA	NA	NA	NA	NA	NA	before 2020/9/10	NA	NA	NA	NA	NA	NA	NA	NA	NA	NA	NA	NA	NA	NA	NA	NA	NA	NA	NA	NA	NA	NA	NA	NA	NA	NA	NA	NA	NA	NA	NA	NA	NA	NA	NA	NA
923	0	1	45	America	NA	NA	NA	NA	NA	NA	NA	NA	before 2020/9/10	NA	NA	NA	NA	NA	NA	NA	NA	NA	NA	NA	NA	NA	NA	NA	NA	NA	NA	NA	NA	NA	NA	NA	NA	NA	NA	NA	NA	NA	NA	NA	NA	NA	NA	NA	NA
924	0	1	20	America	NA	NA	NA	NA	NA	NA	NA	NA	before 2020/9/10	NA	NA	NA	NA	NA	NA	NA	NA	NA	NA	NA	NA	NA	NA	NA	NA	NA	NA	NA	NA	NA	NA	NA	NA	NA	NA	NA	NA	NA	NA	NA	NA	NA	NA	NA	NA
925	0	1	34	America	NA	NA	NA	NA	NA	NA	NA	NA	before 2020/9/10	NA	NA	NA	NA	NA	NA	NA	NA	NA	NA	NA	NA	NA	NA	NA	NA	NA	NA	NA	NA	NA	NA	NA	NA	NA	NA	NA	NA	NA	NA	NA	NA	NA	NA	NA	NA
926	0	0	37	America	NA	NA	NA	NA	NA	NA	NA	NA	before 2020/9/10	NA	NA	NA	NA	NA	NA	NA	NA	NA	NA	NA	NA	NA	NA	NA	NA	NA	NA	NA	NA	NA	NA	NA	NA	NA	NA	NA	NA	NA	NA	NA	NA	NA	NA	NA	NA
927	0	0	38	America	NA	NA	NA	NA	NA	NA	NA	NA	before 2020/9/10	NA	NA	NA	NA	NA	NA	NA	NA	NA	NA	NA	NA	NA	NA	NA	NA	NA	NA	NA	NA	NA	NA	NA	NA	NA	NA	NA	NA	NA	NA	NA	NA	NA	NA	NA	NA
928	0	1	32	America	NA	NA	NA	NA	NA	NA	NA	NA	before 2020/9/10	NA	NA	NA	NA	NA	NA	NA	NA	NA	NA	NA	NA	NA	NA	NA	NA	NA	NA	NA	NA	NA	NA	NA	NA	NA	NA	NA	NA	NA	NA	NA	NA	NA	NA	NA	NA
929	0	1	38	America	NA	NA	NA	NA	NA	NA	NA	NA	before 2020/9/10	NA	NA	NA	NA	NA	NA	NA	NA	NA	NA	NA	NA	NA	NA	NA	NA	NA	NA	NA	NA	NA	NA	NA	NA	NA	NA	NA	NA	NA	NA	NA	NA	NA	NA	NA	NA
930	0	0	45	America	NA	NA	NA	NA	NA	NA	NA	NA	before 2020/9/10	NA	NA	NA	NA	NA	NA	NA	NA	NA	NA	NA	NA	NA	NA	NA	NA	NA	NA	NA	NA	NA	NA	NA	NA	NA	NA	NA	NA	NA	NA	NA	NA	NA	NA	NA	NA
931	0	0	35	America	NA	NA	NA	NA	NA	NA	NA	NA	before 2020/9/10	NA	NA	NA	NA	NA	NA	NA	NA	NA	NA	NA	NA	NA	NA	NA	NA	NA	NA	NA	NA	NA	NA	NA	NA	NA	NA	NA	NA	NA	NA	NA	NA	NA	NA	NA	NA
932	0	0	42	America	NA	NA	NA	NA	NA	NA	NA	NA	before 2020/9/10	NA	NA	NA	NA	NA	NA	NA	NA	NA	NA	NA	NA	NA	NA	NA	NA	NA	NA	NA	NA	NA	NA	NA	NA	NA	NA	NA	NA	NA	NA	NA	NA	NA	NA	NA	NA
933	0	0	52	America	NA	NA	NA	NA	NA	NA	NA	NA	before 2020/9/10	NA	NA	NA	NA	NA	NA	NA	NA	NA	NA	NA	NA	NA	NA	NA	NA	NA	NA	NA	NA	NA	NA	NA	NA	NA	NA	NA	NA	NA	NA	NA	NA	NA	NA	NA	NA
934	0	0	45	America	NA	NA	NA	NA	NA	NA	NA	NA	before 2020/9/10	NA	NA	NA	NA	NA	NA	NA	NA	NA	NA	NA	NA	NA	NA	NA	NA	NA	NA	NA	NA	NA	NA	NA	NA	NA	NA	NA	NA	NA	NA	NA	NA	NA	NA	NA	NA
935	0	0	59	America	NA	NA	NA	NA	NA	NA	NA	NA	before 2020/9/10	NA	NA	NA	NA	NA	NA	NA	NA	NA	NA	NA	NA	NA	NA	NA	NA	NA	NA	NA	NA	NA	NA	NA	NA	NA	NA	NA	NA	NA	NA	NA	NA	NA	NA	NA	NA
936	0	0	40	America	NA	NA	NA	NA	NA	NA	NA	NA	before 2020/9/10	NA	NA	NA	NA	NA	NA	NA	NA	NA	NA	NA	NA	NA	NA	NA	NA	NA	NA	NA	NA	NA	NA	NA	NA	NA	NA	NA	NA	NA	NA	NA	NA	NA	NA	NA	NA
937	0	1	39	America	NA	NA	NA	NA	NA	NA	NA	NA	before 2020/9/10	NA	NA	NA	NA	NA	NA	NA	NA	NA	NA	NA	NA	NA	NA	NA	NA	NA	NA	NA	NA	NA	NA	NA	NA	NA	NA	NA	NA	NA	NA	NA	NA	NA	NA	NA	NA
938	0	0	69	America	NA	NA	NA	NA	NA	NA	NA	NA	before 2020/9/10	NA	NA	NA	NA	NA	NA	NA	NA	NA	NA	NA	NA	NA	NA	NA	NA	NA	NA	NA	NA	NA	NA	NA	NA	NA	NA	NA	NA	NA	NA	NA	NA	NA	NA	NA	NA
939	0	0	43	America	NA	NA	NA	NA	NA	NA	NA	NA	before 2020/9/10	NA	NA	NA	NA	NA	NA	NA	NA	NA	NA	NA	NA	NA	NA	NA	NA	NA	NA	NA	NA	NA	NA	NA	NA	NA	NA	NA	NA	NA	NA	NA	NA	NA	NA	NA	NA
940	0	1	46	America	NA	NA	NA	NA	NA	NA	NA	NA	before 2020/9/10	NA	NA	NA	NA	NA	NA	NA	NA	NA	NA	NA	NA	NA	NA	NA	NA	NA	NA	NA	NA	NA	NA	NA	NA	NA	NA	NA	NA	NA	NA	NA	NA	NA	NA	NA	NA
941	0	1	43	America	NA	NA	NA	NA	NA	NA	NA	NA	before 2020/9/10	NA	NA	NA	NA	NA	NA	NA	NA	NA	NA	NA	NA	NA	NA	NA	NA	NA	NA	NA	NA	NA	NA	NA	NA	NA	NA	NA	NA	NA	NA	NA	NA	NA	NA	NA	NA
942	0	0	28	America	NA	NA	NA	NA	NA	NA	NA	NA	before 2020/9/10	NA	NA	NA	NA	NA	NA	NA	NA	NA	NA	NA	NA	NA	NA	NA	NA	NA	NA	NA	NA	NA	NA	NA	NA	NA	NA	NA	NA	NA	NA	NA	NA	NA	NA	NA	NA
943	0	1	31	America	NA	NA	NA	NA	NA	NA	NA	NA	before 2020/9/10	NA	NA	NA	NA	NA	NA	NA	NA	NA	NA	NA	NA	NA	NA	NA	NA	NA	NA	NA	NA	NA	NA	NA	NA	NA	NA	NA	NA	NA	NA	NA	NA	NA	NA	NA	NA
944	0	1	47	America	NA	NA	NA	NA	NA	NA	NA	NA	before 2020/9/10	NA	NA	NA	NA	NA	NA	NA	NA	NA	NA	NA	NA	NA	NA	NA	NA	NA	NA	NA	NA	NA	NA	NA	NA	NA	NA	NA	NA	NA	NA	NA	NA	NA	NA	NA	NA
945	0	0	41	America	NA	NA	NA	NA	NA	NA	NA	NA	before 2020/9/10	NA	NA	NA	NA	NA	NA	NA	NA	NA	NA	NA	NA	NA	NA	NA	NA	NA	NA	NA	NA	NA	NA	NA	NA	NA	NA	NA	NA	NA	NA	NA	NA	NA	NA	NA	NA
946	0	0	42	America	NA	NA	NA	NA	NA	NA	NA	NA	before 2020/9/10	NA	NA	NA	NA	NA	NA	NA	NA	NA	NA	NA	NA	NA	NA	NA	NA	NA	NA	NA	NA	NA	NA	NA	NA	NA	NA	NA	NA	NA	NA	NA	NA	NA	NA	NA	NA
947	0	1	59	America	NA	NA	NA	NA	NA	NA	NA	NA	before 2020/9/10	NA	NA	NA	NA	NA	NA	NA	NA	NA	NA	NA	NA	NA	NA	NA	NA	NA	NA	NA	NA	NA	NA	NA	NA	NA	NA	NA	NA	NA	NA	NA	NA	NA	NA	NA	NA
948	0	1	42	America	NA	NA	NA	NA	NA	NA	NA	NA	before 2020/9/10	NA	NA	NA	NA	NA	NA	NA	NA	NA	NA	NA	NA	NA	NA	NA	NA	NA	NA	NA	NA	NA	NA	NA	NA	NA	NA	NA	NA	NA	NA	NA	NA	NA	NA	NA	NA
949	0	1	40	America	NA	NA	NA	NA	NA	NA	NA	NA	before 2020/9/10	NA	NA	NA	NA	NA	NA	NA	NA	NA	NA	NA	NA	NA	NA	NA	NA	NA	NA	NA	NA	NA	NA	NA	NA	NA	NA	NA	NA	NA	NA	NA	NA	NA	NA	NA	NA
950	0	1	31	America	NA	NA	NA	NA	NA	NA	NA	NA	before 2020/9/10	NA	NA	NA	NA	NA	NA	NA	NA	NA	NA	NA	NA	NA	NA	NA	NA	NA	NA	NA	NA	NA	NA	NA	NA	NA	NA	NA	NA	NA	NA	NA	NA	NA	NA	NA	NA
951	0	0	36	America	NA	NA	NA	NA	NA	NA	NA	NA	before 2020/9/10	NA	NA	NA	NA	NA	NA	NA	NA	NA	NA	NA	NA	NA	NA	NA	NA	NA	NA	NA	NA	NA	NA	NA	NA	NA	NA	NA	NA	NA	NA	NA	NA	NA	NA	NA	NA
952	0	0	61	America	NA	NA	NA	NA	NA	NA	NA	NA	before 2020/9/10	NA	NA	NA	NA	NA	NA	NA	NA	NA	NA	NA	NA	NA	NA	NA	NA	NA	NA	NA	NA	NA	NA	NA	NA	NA	NA	NA	NA	NA	NA	NA	NA	NA	NA	NA	NA
953	0	1	28	America	NA	NA	NA	NA	NA	NA	NA	NA	before 2020/9/10	NA	NA	NA	NA	NA	NA	NA	NA	NA	NA	NA	NA	NA	NA	NA	NA	NA	NA	NA	NA	NA	NA	NA	NA	NA	NA	NA	NA	NA	NA	NA	NA	NA	NA	NA	NA
954	0	0	50	America	NA	NA	NA	NA	NA	NA	NA	NA	before 2020/9/10	NA	NA	NA	NA	NA	NA	NA	NA	NA	NA	NA	NA	NA	NA	NA	NA	NA	NA	NA	NA	NA	NA	NA	NA	NA	NA	NA	NA	NA	NA	NA	NA	NA	NA	NA	NA
955	0	1	46	America	NA	NA	NA	NA	NA	NA	NA	NA	before 2020/9/10	NA	NA	NA	NA	NA	NA	NA	NA	NA	NA	NA	NA	NA	NA	NA	NA	NA	NA	NA	NA	NA	NA	NA	NA	NA	NA	NA	NA	NA	NA	NA	NA	NA	NA	NA	NA
956	0	0	53	America	NA	NA	NA	NA	NA	NA	NA	NA	before 2020/9/10	NA	NA	NA	NA	NA	NA	NA	NA	NA	NA	NA	NA	NA	NA	NA	NA	NA	NA	NA	NA	NA	NA	NA	NA	NA	NA	NA	NA	NA	NA	NA	NA	NA	NA	NA	NA
957	0	0	54	America	NA	NA	NA	NA	NA	NA	NA	NA	before 2020/9/10	NA	NA	NA	NA	NA	NA	NA	NA	NA	NA	NA	NA	NA	NA	NA	NA	NA	NA	NA	NA	NA	NA	NA	NA	NA	NA	NA	NA	NA	NA	NA	NA	NA	NA	NA	NA
958	0	0	51	America	NA	NA	NA	NA	NA	NA	NA	NA	before 2020/9/10	NA	NA	NA	NA	NA	NA	NA	NA	NA	NA	NA	NA	NA	NA	NA	NA	NA	NA	NA	NA	NA	NA	NA	NA	NA	NA	NA	NA	NA	NA	NA	NA	NA	NA	NA	NA
959	0	0	40	America	NA	NA	NA	NA	NA	NA	NA	NA	before 2020/9/10	NA	NA	NA	NA	NA	NA	NA	NA	NA	NA	NA	NA	NA	NA	NA	NA	NA	NA	NA	NA	NA	NA	NA	NA	NA	NA	NA	NA	NA	NA	NA	NA	NA	NA	NA	NA
960	0	0	51	America	NA	NA	NA	NA	NA	NA	NA	NA	before 2020/9/10	NA	NA	NA	NA	NA	NA	NA	NA	NA	NA	NA	NA	NA	NA	NA	NA	NA	NA	NA	NA	NA	NA	NA	NA	NA	NA	NA	NA	NA	NA	NA	NA	NA	NA	NA	NA
961	0	0	61	America	NA	NA	NA	NA	NA	NA	NA	NA	before 2020/9/10	NA	NA	NA	NA	NA	NA	NA	NA	NA	NA	NA	NA	NA	NA	NA	NA	NA	NA	NA	NA	NA	NA	NA	NA	NA	NA	NA	NA	NA	NA	NA	NA	NA	NA	NA	NA
962	0	1	45	Belgium	NA	NA	NA	NA	NA	NA	NA	NA	Before 2020/8/14	NA	NA	NA	NA	NA	NA	NA	NA	NA	NA	NA	NA	NA	NA	NA	NA	NA	NA	NA	NA	NA	NA	NA	NA	NA	NA	NA	NA	NA	NA	NA	NA	NA	NA	NA	NA
963	0	1	23	Belgium	NA	NA	NA	NA	NA	NA	NA	NA	before 2020/8/14	NA	NA	NA	NA	NA	NA	NA	NA	NA	NA	NA	NA	NA	NA	NA	NA	NA	NA	NA	NA	NA	NA	NA	NA	NA	NA	NA	NA	NA	NA	NA	NA	NA	NA	NA	NA
964	0	0	29	Canada	NA	NA	NA	NA	NA	NA	NA	NA	before 2020/7/11	NA	NA	NA	NA	NA	NA	NA	NA	NA	NA	NA	NA	NA	NA	NA	NA	NA	NA	NA	NA	NA	NA	NA	NA	NA	NA	NA	NA	NA	NA	NA	NA	NA	NA	NA	NA
965	0	1	31	France	2020-01-19	2020-01-24	2020-02-12	6	20	25	0	1	before 2020/5/12	NA	NA	NA	NA	NA	NA	NA	NA	NA	NA	NA	NA	NA	NA	NA	NA	NA	NA	NA	NA	NA	NA	1	0	0	0	0	0	0	NA	NA	NA	NA	NA	NA	NA
966	0	0	103	Iceland	NA	NA	2020-05-02	NA	NA	NA	NA	NA	2020-05-07	NA	NA	NA	NA	NA	NA	NA	NA	NA	NA	NA	NA	NA	NA	NA	NA	NA	NA	NA	NA	NA	NA	NA	NA	NA	NA	NA	NA	NA	NA	NA	NA	NA	NA	NA	NA
967	0	1	64	Mexico	NA	NA	NA	NA	NA	NA	0	0	2020/4/17-2020/5/8	NA	NA	NA	NA	NA	NA	NA	NA	NA	NA	NA	NA	NA	NA	NA	NA	NA	NA	NA	NA	NA	NA	NA	NA	NA	NA	NA	NA	NA	NA	NA	NA	NA	NA	NA	NA
968	0	0	85	Russian	NA	2020-04-27	2020-05-29	NA	33	NA	NA	NA	before 2020/5/29	NA	NA	NA	NA	NA	NA	NA	NA	NA	NA	NA	NA	NA	NA	NA	NA	NA	NA	NA	NA	NA	NA	NA	NA	NA	NA	NA	NA	NA	NA	NA	NA	NA	NA	NA	NA
969	1	1	55	Haiti	NA	NA	2020-04-05	NA	NA	NA	NA	NA	before 2020/4/5	1	1	1	NA	NA	NA	NA	NA	NA	NA	NA	NA	NA	NA	NA	NA	NA	NA	NA	NA	NA	NA	NA	NA	NA	NA	NA	NA	NA	NA	NA	NA	NA	NA	NA	NA
970	0	1	26	Haiti	2020-01-06	2020-04-30	NA	115	NA	NA	0	0	before 2020/6/13	1	NA	NA	NA	NA	NA	NA	NA	NA	NA	1	1	1	1	1	NA	NA	NA	NA	NA	NA	NA	1	NA	NA	NA	NA	NA	NA	0	0	0	0	0	0	0
971	0	1	75	Slovakia	2020-06-10	NA	NA	NA	14	NA	NA	NA	before 2020/8/2	NA	NA	NA	NA	NA	NA	NA	NA	NA	NA	NA	1	1	1	1	NA	NA	NA	NA	NA	NA	NA	1	NA	NA	NA	NA	NA	0	1	NA	NA	1	NA	NA	NA
972	0	0	61	Bahamas	NA	2020-03-15	2020-03-24	NA	9	NA	NA	NA	2020-03-24	NA	NA	NA	NA	NA	NA	NA	NA	NA	NA	NA	NA	NA	NA	NA	NA	NA	NA	NA	NA	NA	NA	NA	NA	NA	NA	NA	NA	NA	NA	NA	NA	NA	NA	NA	NA
973	0	0	30	Finland	2020-01-26	2020-01-28	2020-02-05	2	8	10	NA	NA	before2020/3/6	NA	NA	NA	NA	NA	NA	NA	NA	NA	NA	NA	1	1	1	0	0	0	0	0	0	1	NA	NA	NA	NA	NA	NA	NA	NA	0	0	0	0	0	NA	0
974	1	1	75	Belarus	NA	2020-03-22	2020-03-30	NA	8	NA	NA	NA	2020-03-31	NA	NA	NA	NA	NA	NA	NA	NA	NA	NA	NA	NA	NA	NA	NA	NA	NA	NA	NA	NA	NA	NA	NA	NA	NA	NA	NA	NA	NA	NA	NA	NA	NA	NA	NA	NA
975	1	1	52	Barbados	NA	NA	NA	NA	NA	NA	NA	NA	2020-03-29	NA	NA	NA	NA	NA	NA	NA	NA	NA	NA	NA	NA	NA	NA	NA	NA	NA	NA	NA	NA	NA	NA	NA	NA	NA	NA	NA	NA	NA	NA	NA	NA	NA	NA	NA	NA
976	0	0	12	Georgia	NA	NA	NA	NA	NA	NA	0	1	before 2020/4/29	NA	NA	NA	NA	NA	NA	NA	NA	NA	NA	NA	1	1	1	1	NA	NA	NA	NA	NA	NA	1	NA	NA	NA	NA	NA	NA	1	1	NA	NA	NA	1	NA	NA
977	0	0	55	Georgia	NA	NA	NA	NA	NA	NA	0	0	before 2020/9	1	1	1	NA	NA	NA	NA	NA	NA	NA	NA	1	1	1	1	1	NA	NA	NA	NA	NA	NA	1	NA	NA	NA	NA	NA	NA	NA	NA	NA	NA	NA	NA	NA
978	0	0	16	Georgia	NA	NA	NA	NA	NA	NA	0	1	before 2020/4/16	NA	NA	NA	NA	NA	NA	NA	NA	NA	NA	NA	1	1	NA	1	1	NA	NA	1	NA	NA	NA	1	1	NA	NA	NA	NA	NA	1	NA	NA	NA	NA	1	NA
979	1	1	7	Georgia	NA	NA	NA	NA	NA	NA	NA	NA	before 2020/8/6	NA	NA	NA	NA	NA	NA	NA	NA	NA	NA	NA	NA	NA	NA	NA	NA	NA	NA	NA	NA	NA	NA	NA	NA	NA	NA	NA	NA	NA	NA	NA	NA	NA	NA	NA	NA
980	1	1	64	Georgia	NA	NA	NA	NA	NA	NA	NA	NA	before 2020/8/6	NA	NA	NA	NA	NA	NA	NA	NA	NA	NA	NA	NA	NA	NA	NA	NA	NA	NA	NA	NA	NA	NA	NA	NA	NA	NA	NA	NA	NA	NA	NA	NA	NA	NA	NA	NA
981	1	0	79	Georgia	NA	NA	NA	NA	NA	NA	NA	NA	2020-04-04	NA	NA	NA	NA	NA	NA	NA	NA	NA	NA	NA	NA	NA	NA	NA	NA	NA	NA	NA	NA	NA	NA	NA	NA	NA	NA	NA	NA	NA	NA	NA	NA	NA	NA	NA	NA
[truncated: 10 more columns]
