# Supplementary material for: Mortality risk of COVID-19 in elderly males with comorbidities: a multi-country study
Source: publisher site journal article supplement (doi:10.18632/aging.202456), 2020-12-31
Supplement: Supplementary file [file aging-v13i1-202456-supplementary-material-SD1.pdf]

**SUPPLEMENTARY FIGURES**

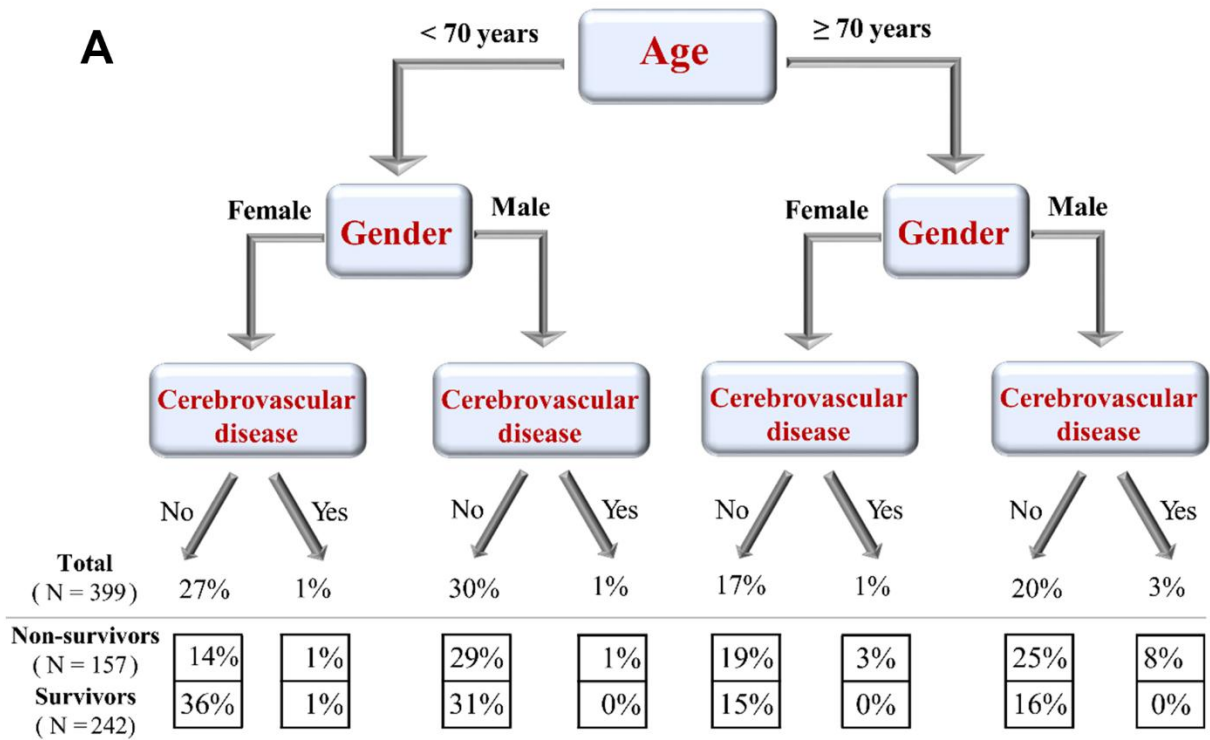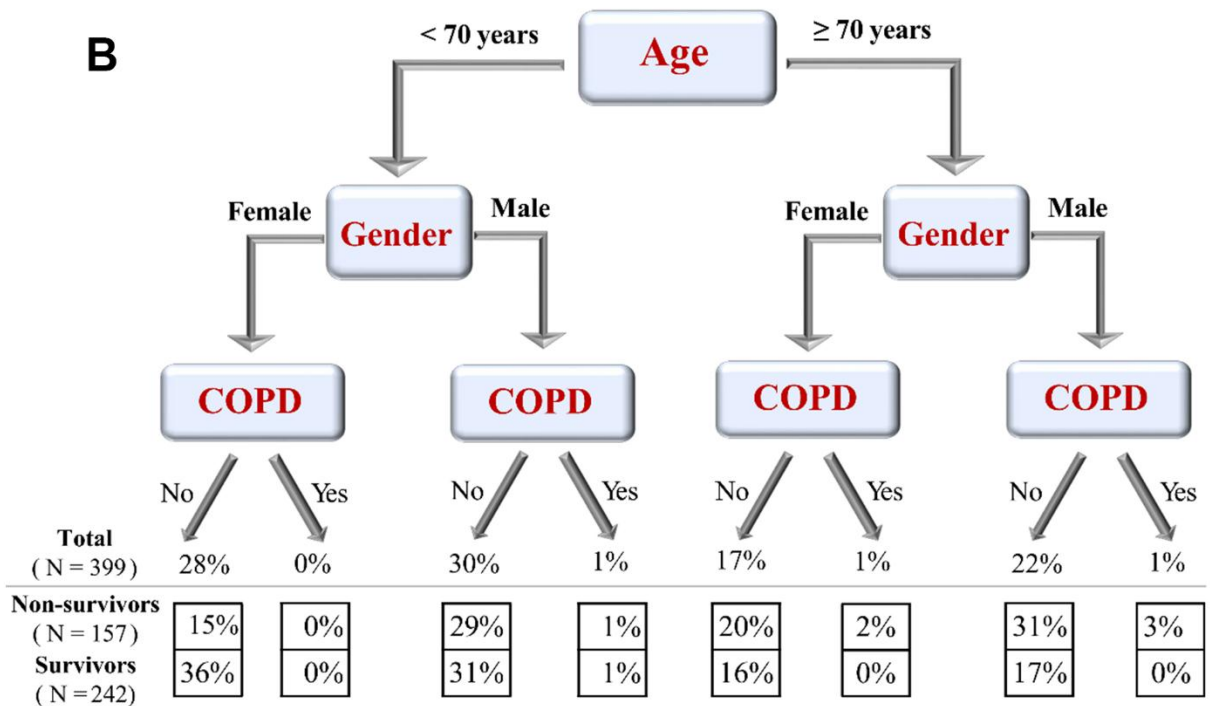

**Supplementary Figure 1.** A tree model shows proportions of COVID-19 survivors and non-survivors based on patient age and gender plus either cerebrovascular disease (A) or COPD (B).

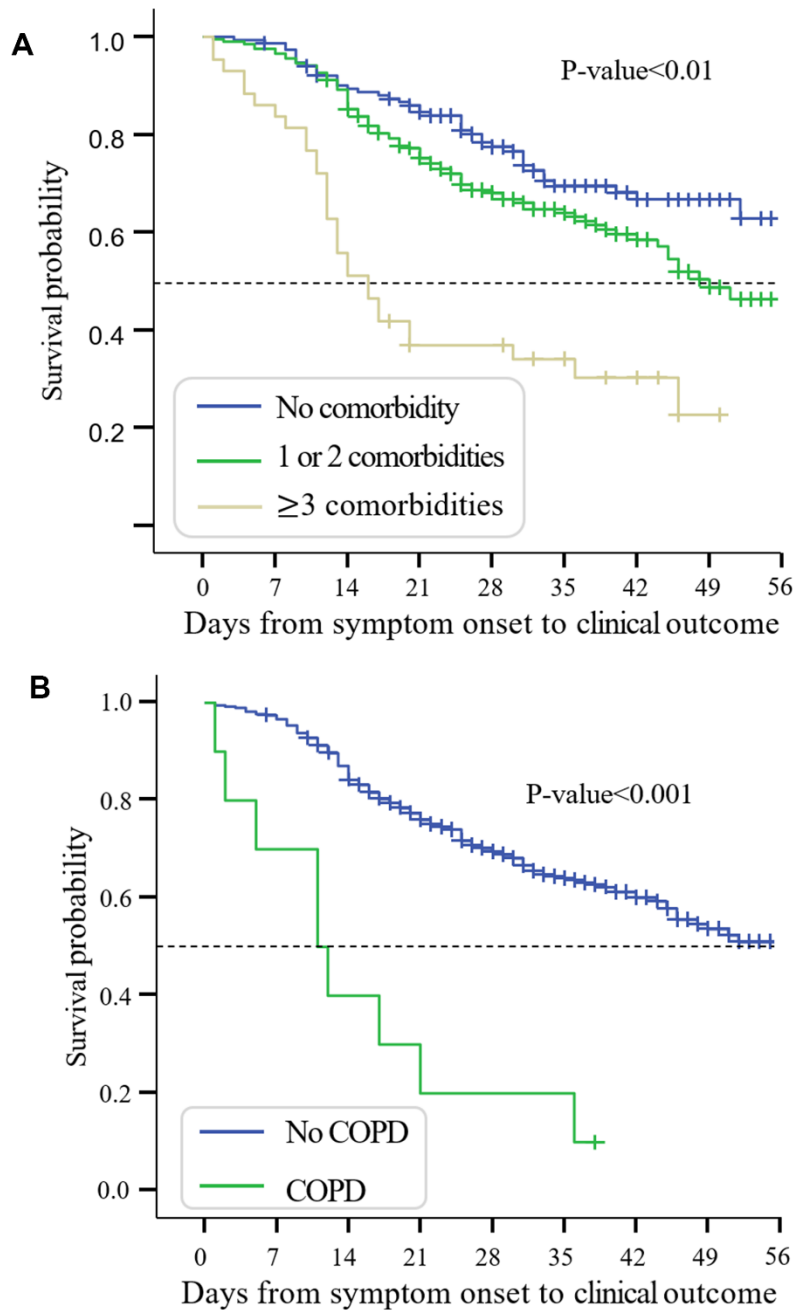

**Supplementary Figure 2. Kaplan-Meier curves of COVID-19 patients.** (A) Kaplan-Meier curves of COVID-19 patients with  $\geq 3$  comorbidities (brown), 1 or 2 comorbidities (green), or without any comorbidity (blue). (B) Kaplan-Meier curves of COVID-19 patients with or without COPD. Survival probabilities of patients with COPD (green) and without COPD (blue) are shown with the significant difference ( $p$ -value < 0.001).

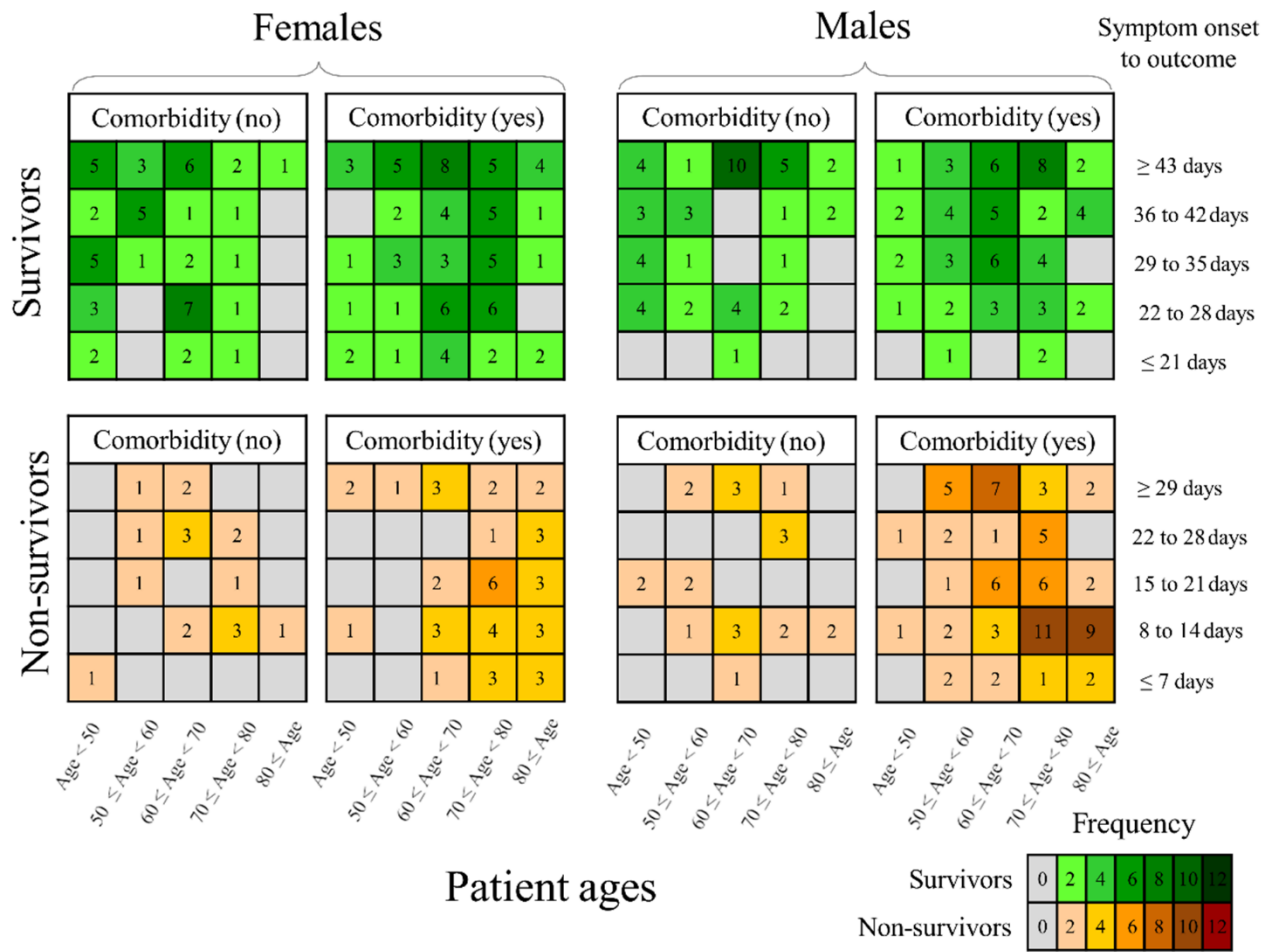

Supplementary Figure 3. Days from symptom onset to clinical outcomes under the conditions of patient age, gender, and comorbidities.
