# Supplementary material for: Mortality risk of COVID-19 in elderly males with comorbidities: a multi-country study
Source: publisher site journal article supplement (doi:10.18632/aging.202456), 2020-12-31
Supplement: Supplementary file [file aging-v13i1-202456-supplementary-material-SD2.pdf]

## SUPPLEMENTARY TABLES

**Supplementary Table 1. Proportions of comorbidities in females/males and survivors/non-survivors.**

|                         | <b>Total<br/>(N=598)</b> | <b>Survivors<br/>(N=359)</b> | <b>Non-survivors<br/>(N=239)</b> | <b>P-value</b>  | <b>Females<br/>(N=338)</b> | <b>Males<br/>(N=260)</b> | <b>P-value</b> |
|-------------------------|--------------------------|------------------------------|----------------------------------|-----------------|----------------------------|--------------------------|----------------|
| Any comorbidity         | 412 (69%)                | 218 (61%)                    | 194 (81%)                        | <b>&lt;0.01</b> | 173 (67%)                  | 239 (71%)                | 0.27           |
| 1 comorbidity           | 209 (35%)                | 122 (34%)                    | 87 (36%)                         |                 | 95 (37%)                   | 114 (34%)                |                |
| 2 comorbidities         | 142 (24%)                | 73 (20%)                     | 69 (29%)                         | <b>0.016</b>    | 58 (22%)                   | 84 (25%)                 | 0.20           |
| ≥3 comorbidities        | 61 (10%)                 | 23 (6%)                      | 38 (16%)                         |                 | 20 (8%)                    | 41 (12%)                 |                |
| Hypertension            | 198 (33%)                | 109 (30%)                    | 89 (37%)                         | 0.08            | 85 (33%)                   | 113 (33%)                | 0.85           |
| Diabetes mellitus       | 161 (27%)                | 87 (24%)                     | 74 (31%)                         | 0.07            | 68 (26%)                   | 93 (28%)                 | 0.71           |
| Cardiovascular disease  | 178 (30%)                | 85 (24%)                     | 93 (39%)                         | <b>&lt;0.01</b> | 72 (28%)                   | 106 (31%)                | 0.33           |
| Cancers                 | 47 (8%)                  | 22 (6%)                      | 25 (11%)                         | 0.05            | 15 (6%)                    | 32 (10%)                 | 0.10           |
| Cerebrovascular disease | 28 (5%)                  | 8 (2%)                       | 20 (8%)                          | <b>&lt;0.01</b> | 9 (3%)                     | 19 (6%)                  | 0.22           |
| COPD                    | 26 (4%)                  | 4 (1%)                       | 22 (9%)                          | <b>&lt;0.01</b> | 9 (3%)                     | 17 (5%)                  | 0.35           |
| Chronic bronchitis      | 16 (3%)                  | 7 (2%)                       | 9 (4%)                           | 0.18            | 4 (2%)                     | 12 (4%)                  | 0.13           |
| Chronic liver disease   | 11 (2%)                  | 4 (1%)                       | 7 (3%)                           | 0.11            | 4 (2%)                     | 7 (2%)                   | 0.62           |
| Digestive disease       | 8 (1%)                   | 3 (1%)                       | 5 (2%)                           | 0.19            | 4 (2%)                     | 4 (1%)                   | 0.71           |
| Tuberculosis            | 6 (1%)                   | 3 (1%)                       | 3 (1%)                           | 0.61            | 1 (0.4%)                   | 5 (1%)                   | 0.18           |

**Supplementary Table 2. Mortality-related complications in non-survivors before their death.**

|                                        | <b>Total (N=102)</b> | <b>Female (N=37)</b> | <b>Male (N=65)</b> | <b>P-value</b> |
|----------------------------------------|----------------------|----------------------|--------------------|----------------|
| Any complication                       | 102 (100%)           | 37 (100%)            | 65 (100%)          | 1.0            |
| Respiratory failure                    | 52 (51.0%)           | 18 (48.6%)           | 34 (52.3%)         | 0.72           |
| Acute respiratory distress syndrome    | 29 (28.4%)           | 9 (24.3%)            | 20 (30.8%)         | 0.49           |
| Multiple organ failure                 | 28 (27.5%)           | 11 (29.7%)           | 17 (26.2%)         | 0.70           |
| Shock                                  | 23 (22.5%)           | 9 (24.3%)            | 14 (21.5%)         | 0.75           |
| Hypoxia                                | 14 (13.7%)           | 6 (16.2%)            | 8 (12.3%)          | 0.58           |
| Coma                                   | 9 (8.8%)             | 2 (5.4%)             | 7 (10.8%)          | 0.36           |
| Hepatic insufficiency                  | 9 (8.8%)             | 3 (8.1%)             | 6 (9.2%)           | 0.85           |
| Fluid and electrolyte balance          | 9 (8.8%)             | 4 (10.8%)            | 5 (7.7%)           | 0.59           |
| Renal insufficiency                    | 8 (7.8%)             | 4 (10.8%)            | 4 (6.2%)           | 0.40           |
| Heart failure                          | 7 (6.9%)             | 4 (10.8%)            | 3 (4.6%)           | 0.23           |
| Acute myocardial injury                | 5 (4.9%)             | 0 (0.0%)             | 5 (7.7%)           | 0.08           |
| Acidosis                               | 4 (3.9%)             | 2 (5.4%)             | 2 (3.1%)           | 0.56           |
| Sepsis                                 | 3 (2.9%)             | 0 (0.0%)             | 3 (4.6%)           | 0.18           |
| Disseminated intravascular coagulation | 3 (2.9%)             | 0 (0.0%)             | 3 (4.6%)           | 0.18           |

**Supplementary Table 3.1. Comparisons of baseline characteristics in the original sample and the propensity score-matched sample by gender.**

|                          | Original sample |               |         | Matched sample  |               |         |
|--------------------------|-----------------|---------------|---------|-----------------|---------------|---------|
|                          | Female(n=184)   | Male(n=215)   | P-value | Female(n=157)   | Male(n=157)   | P-value |
| Age, median (IQR)        | 66 (56.3 to 73) | 67 (58 to 74) | 0.37    | 65 (55.5 to 73) | 67 (57 to 74) | 0.29    |
| <b>Region</b>            |                 |               |         |                 |               |         |
| China                    | 170 (92.4%)     | 196 (91.2%)   | 0.66    | 149 (94.9%)     | 145 (92.4%)   | 0.36    |
| Europe/North America     | 14 (7.6%)       | 19 (8.8%)     |         | 8 (5.1%)        | 12 (7.6%)     |         |
| <b>Signs or symptoms</b> |                 |               |         |                 |               |         |
| Fever                    | 152 (82.6%)     | 174 (80.9%)   | 0.67    | 130 (82.8%)     | 129 (82.2%)   | 0.88    |
| Cough                    | 117 (63.6%)     | 139 (64.7%)   | 0.83    | 97 (61.8%)      | 100 (63.7%)   | 0.73    |
| Shortness of breath      | 57 (31.0%)      | 92 (42.8%)    | 0.02    | 54 (34.4%)      | 56 (35.7%)    | 0.81    |
| Fatigue                  | 46 (25.0%)      | 61 (28.4%)    | 0.45    | 44 (28.0%)      | 43 (27.4%)    | 0.90    |
| Myalgia                  | 29 (15.8%)      | 29 (13.5%)    | 0.52    | 21 (13.4%)      | 23 (14.6%)    | 0.75    |
| Chills                   | 24 (13.0%)      | 39 (18.1%)    | 0.16    | 23 (14.6%)      | 27 (17.2%)    | 0.54    |
| Diarrhea                 | 28 (15.2%)      | 31 (14.4%)    | 0.82    | 22 (14.0%)      | 23 (14.6%)    | 0.87    |
| Headache                 | 16 (8.7%)       | 15 (7.0%)     | 0.52    | 12 (7.6%)       | 13 (8.3%)     | 0.84    |
| Nausea                   | 11 (6.0%)       | 18 (8.4%)     | 0.36    | 10 (6.4%)       | 11 (7.0%)     | 0.82    |
| Appetite loss            | 25 (13.6%)      | 32 (14.9%)    | 0.71    | 22 (14.0%)      | 24 (15.3%)    | 0.75    |
| <b>Comorbidity</b>       |                 |               |         |                 |               |         |
| Any comorbidity          | 114 (62.0%)     | 141 (65.6%)   | 0.45    | 93 (59.2%)      | 91 (58.0%)    | 0.82    |
| Hypertension             | 75 (40.8%)      | 88 (40.9%)    | 0.97    | 62 (39.5%)      | 62 (39.5%)    | 1.00    |
| Diabetes mellitus        | 50 (27.2%)      | 53 (24.7%)    | 0.57    | 41 (26.1%)      | 35 (22.3%)    | 0.43    |
| Cardiovascular disease   | 30 (16.3%)      | 38 (17.7%)    | 0.72    | 20 (12.7%)      | 25 (15.9%)    | 0.42    |
| Cerebrovascular disease  | 9 (4.9%)        | 16 (7.4%)     | 0.30    | 7 (4.5%)        | 10 (6.4%)     | 0.45    |
| Chronic liver disease    | 3 (1.6%)        | 6 (2.8%)      | 0.52    | 3 (1.9%)        | 1 (0.6%)      | 0.63    |
| Digestive disease        | 4 (2.2%)        | 4 (1.9%)      | 1.00    | 3 (1.9%)        | 1 (0.6%)      | 0.63    |
| Cancer                   | 4 (2.2%)        | 16 (7.4%)     | 0.02    | 4 (2.5%)        | 2 (1.3%)      | 0.68    |
| Chronic bronchitis       | 4 (2.2%)        | 12 (5.6%)     | 0.08    | 4 (2.5%)        | 4 (2.5%)      | 1.00    |
| COPD                     | 3 (1.6%)        | 8 (3.7%)      | 0.20    | 3 (1.9%)        | 2 (1.3%)      | 1.00    |
| Tuberculosis             | 1 (0.5%)        | 5 (2.3%)      | 0.22    | 1 (0.6%)        | 1 (0.6%)      | 1.00    |

IQR: Interquartile range.

**Supplementary Table 3.2. Comparisons of baseline characteristics in the original sample and the propensity score-matched sample by age.**

|                          | Original sample     |                     |                      | Matched sample      |                     |         |
|--------------------------|---------------------|---------------------|----------------------|---------------------|---------------------|---------|
|                          | <70 year<br>(n=235) | ≥70 year<br>(n=164) | P-value              | <70 year<br>(n=129) | ≥70 year<br>(n=129) | P-value |
| Male                     | 123 (52.3%)         | 92 (56.1%)          | 0.46                 | 56 (43.4%)          | 69 (53.5%)          | 0.11    |
| <b>Region</b>            |                     |                     |                      |                     |                     |         |
| China                    | 221 (94.0%)         | 145 (88.4%)         |                      | 126 (97.6%)         | 119 (92.2%)         |         |
| European region          | 9 (3.9%)            | 11 (6.7%)           | 0.12                 | 1 (0.8%)            | 8 (6.2%)            | 0.059   |
| North America            | 5 (2.1%)            | 8 (4.9%)            |                      | 2 (1.6%)            | 2 (1.6%)            |         |
| <b>Signs or symptoms</b> |                     |                     |                      |                     |                     |         |
| Fever                    | 194 (82.6%)         | 132 (80.5%)         | 0.60                 | 105 (81.4%)         | 109 (84.5%)         | 0.51    |
| Cough                    | 159 (67.7%)         | 97 (59.1%)          | 0.08                 | 80 (62.0%)          | 80 (62.0%)          | 1.00    |
| Shortness of breath      | 87 (37.0%)          | 62 (37.8%)          | 0.87                 | 41 (31.8%)          | 45 (34.9%)          | 0.60    |
| Fatigue                  | 62 (26.4%)          | 45 (27.4%)          | 0.82                 | 30 (23.3%)          | 38 (29.5%)          | 0.26    |
| Myalgia                  | 37 (15.7%)          | 21 (12.8%)          | 0.41                 | 19 (14.7%)          | 20 (15.5%)          | 0.86    |
| Chills                   | 40 (17.0%)          | 23 (14.0%)          | 0.42                 | 15 (11.6%)          | 19 (14.7%)          | 0.46    |
| Diarrhea                 | 36 (15.3%)          | 23 (14.0%)          | 0.72                 | 24 (18.6%)          | 21 (16.3%)          | 0.62    |
| Headache                 | 20 (8.5%)           | 11 (6.7%)           | 0.51                 | 11 (8.5%)           | 10 (7.8%)           | 0.82    |
| Nausea                   | 19 (8.1%)           | 10 (6.1%)           | 0.45                 | 8 (6.2%)            | 8 (6.2%)            | 1.00    |
| Appetite loss            | 28 (11.9%)          | 29 (17.7%)          | 0.11                 | 14 (10.9%)          | 26 (20.2%)          | 0.06    |
| <b>Comorbidity</b>       |                     |                     |                      |                     |                     |         |
| Any comorbidity          | 127 (54.0%)         | 128 (78.0%)         | $9.0 \times 10^{-7}$ | 89 (69.0%)          | 93 (72.1%)          | 0.59    |
| Hypertension             | 70 (29.8%)          | 93 (56.7%)          | $7.4 \times 10^{-8}$ | 60 (46.5%)          | 61 (47.3%)          | 0.90    |
| Diabetes mellitus        | 49 (20.9%)          | 54 (32.9%)          | 0.007                | 42 (32.6%)          | 42 (32.6%)          | 1.00    |
| Cardiovascular disease   | 23 (9.8%)           | 45 (27.4%)          | $4.0 \times 10^{-6}$ | 18 (14.0%)          | 18 (14.0%)          | 1.00    |
| Cerebrovascular disease  | 7 (3.0%)            | 18 (11.0%)          | 0.001                | 5 (3.9%)            | 4 (3.1%)            | 1.00    |
| Chronic liver disease    | 7 (3.0%)            | 2 (1.2%)            | 0.32                 | 3 (2.3%)            | 1 (0.8%)            | 0.62    |
| Digestive disease        | 1 (0.4%)            | 7 (4.3%)            | 0.01                 | 1 (0.8%)            | 1 (0.8%)            | 1.00    |
| Cancer                   | 8 (3.4%)            | 12 (7.3%)           | 0.08                 | 3 (2.3%)            | 9 (7.0%)            | 0.08    |
| Chronic bronchitis       | 6 (2.6%)            | 10 (6.1%)           | 0.08                 | 2 (1.6%)            | 8 (6.2%)            | 0.05    |
| COPD                     | 4 (1.7%)            | 7 (4.3%)            | 0.13                 | 3 (2.3%)            | 3 (2.3%)            | 1.00    |
| Tuberculosis             | 5 (2.1%)            | 1 (0.6%)            | 0.41                 | 4 (3.1%)            | 0 (0.0%)            | 0.12    |

**Supplementary Table 3.3. Comparisons of baseline characteristics in the original sample and the propensity score-matched sample by shortness of breath.**

|                          | Original sample             |                                 |         | Matched sample              |                                 |         |
|--------------------------|-----------------------------|---------------------------------|---------|-----------------------------|---------------------------------|---------|
|                          | Shortness of breath (n=149) | Non-Shortness of breath (n=250) | P-value | Shortness of breath (n=133) | Non-Shortness of breath (n=133) | P-value |
| Male                     | 92 (61.7%)                  | 123 (49.2%)                     | 0.02    | 81 (60.9%)                  | 78 (58.6%)                      | 0.71    |
| Age, median (IQR)        | 67 (58 to 73.5)             | 66 (56 to 74)                   | 0.29    | 66 (58 to 73)               | 64 (55 to 73)                   | 0.12    |
| <b>Region</b>            |                             |                                 |         |                             |                                 |         |
| China                    | 129 (86.6%)                 | 237 (94.8%)                     | 0.004   | 123 (92.5%)                 | 120 (90.2%)                     | 0.51    |
| Europe/North America     | 20 (13.4%)                  | 13 (5.2%)                       |         | 10 (7.5%)                   | 13 (9.8%)                       |         |
| <b>Signs or symptoms</b> |                             |                                 |         |                             |                                 |         |
| Fever                    | 120 (80.5%)                 | 206 (82.4%)                     | 0.64    | 110 (82.7%)                 | 109 (82.0%)                     | 0.87    |
| Cough                    | 100 (67.1%)                 | 156(62.4%)                      | 0.34    | 92 (69.2%)                  | 81 (60.9%)                      | 0.16    |
| Fatigue                  | 36 (24.2%)                  | 71 (28.4%)                      | 0.36    | 34 (25.6%)                  | 37 (27.8%)                      | 0.68    |
| Myalgia                  | 27 (18.1%)                  | 31 (12.4%)                      | 0.12    | 26 (19.5%)                  | 24 (18.0%)                      | 0.75    |
| Chills                   | 31 (20.8%)                  | 32 (12.8%)                      | 0.03    | 26 (19.5%)                  | 25 (18.8%)                      | 0.88    |
| Diarrhea                 | 24 (16.1%)                  | 35 (14.0%)                      | 0.57    | 21 (15.8%)                  | 17 (12.8%)                      | 0.48    |
| Headache                 | 12 (8.1%)                   | 19 (7.6%)                       | 0.87    | 10 (7.5%)                   | 10 (7.5%)                       | 1.00    |
| Nausea                   | 11 (7.4%)                   | 18 (7.2%)                       | 0.95    | 10 (7.5%)                   | 8 (6.0%)                        | 0.63    |
| Appetite loss            | 19 (12.8%)                  | 38 (15.2%)                      | 0.50    | 18 (13.5%)                  | 17 (12.8%)                      | 0.86    |
| <b>Comorbidity</b>       |                             |                                 |         |                             |                                 |         |
| Any comorbidity          | 100 (67.1%)                 | 155 (62.0%)                     | 0.30    | 84 (63.2%)                  | 83 (62.4%)                      | 0.90    |
| Hypertension             | 59 (39.6%)                  | 104 (41.6%)                     | 0.69    | 50 (37.6%)                  | 51 (38.3%)                      | 0.90    |
| Diabetes mellitus        | 42 (28.2%)                  | 61 (24.4%)                      | 0.40    | 37 (27.8%)                  | 33 (24.8%)                      | 0.58    |
| Cardiovascular disease   | 35 (23.5%)                  | 33 (13.2%)                      | 0.008   | 23 (17.3%)                  | 18 (13.5%)                      | 0.40    |
| Cerebrovascular disease  | 12 (8.1%)                   | 13 (5.2%)                       | 0.26    | 9 (6.8%)                    | 3 (2.3%)                        | 0.08    |
| Chronic liver disease    | 2 (1.3%)                    | 7 (2.8%)                        | 0.49    | 2 (1.5%)                    | 2 (1.5%)                        | 1.00    |
| Digestive disease        | 4 (2.7%)                    | 4 (1.6%)                        | 0.48    | 4 (3.0%)                    | 0 (0.0%)                        | 0.12    |
| Cancer                   | 6 (4.0%)                    | 14 (5.6%)                       | 0.49    | 6 (4.5%)                    | 6 (4.5%)                        | 1.00    |
| Chronic bronchitis       | 6 (4.0%)                    | 10 (4.0%)                       | 0.99    | 6 (4.5%)                    | 4 (3.0%)                        | 0.52    |
| COPD                     | 9 (6.0%)                    | 2 (0.8%)                        | 0.003   | 1 (0.8%)                    | 2 (1.5%)                        | 1.00    |
| Tuberculosis             | 1 (0.7%)                    | 5 (2.0%)                        | 0.42    | 1 (0.8%)                    | 4 (3.0%)                        | 0.37    |

IQR: interquartile range.

**Supplementary Table 3.4. Comparisons of baseline characteristics in the original sample and the propensity score-matched sample by any comorbidity.**

|                          | Original sample        |                                |                       | Matched sample         |                                |         |
|--------------------------|------------------------|--------------------------------|-----------------------|------------------------|--------------------------------|---------|
|                          | Comorbidity<br>(n=255) | Non-<br>comorbidity<br>(n=144) | P-value               | Comorbidity<br>(n=123) | Non-<br>comorbidity<br>(n=123) | P-value |
| Male                     | 141 (55.3%)            | 74 (51.4%)                     | 0.45                  | 64 (52.0%)             | 63 (51.2%)                     | 0.90    |
| Age, median (IQR)        | 70 (62 to 76)          | 62 (50 to 69.8)                | $2.5 \times 10^{-10}$ | 64 (56 to 70)          | 63 (57 to 70)                  | 0.92    |
| <b>Region</b>            |                        |                                |                       |                        |                                |         |
| China                    | 223 (87.5%)            | 143 (99.3%)                    | $3.6 \times 10^{-5}$  | 121 (98.4%)            | 122 (99.2%)                    | 1.00    |
| Europe/North America     | 32 (12.5%)             | 1 (0.7%)                       |                       | 2 (1.6%)               | 1 (0.8%)                       |         |
| <b>Signs or symptoms</b> |                        |                                |                       |                        |                                |         |
| Fever                    | 204 (80.0%)            | 122 (84.7%)                    | 0.24                  | 104 (84.6%)            | 105 (85.4%)                    | 0.86    |
| Cough                    | 159 (62.4%)            | 97 (67.4%)                     | 0.32                  | 79 (64.2%)             | 82 (66.7%)                     | 0.69    |
| Shortness of breath      | 100 (39.2%)            | 49 (34.0%)                     | 0.30                  | 44 (35.8%)             | 46 (37.4%)                     | 0.79    |
| Fatigue                  | 67 (26.3%)             | 40 (27.8%)                     | 0.75                  | 35 (28.5%)             | 34 (27.6%)                     | 0.89    |
| Myalgia                  | 34 (13.3%)             | 24 (16.7%)                     | 0.36                  | 19 (15.4%)             | 22 (17.9%)                     | 0.61    |
| Chills                   | 35 (13.7%)             | 28 (19.4%)                     | 0.13                  | 18 (14.6%)             | 23 (18.7%)                     | 0.39    |
| Diarrhea                 | 38 (14.9%)             | 21 (14.6%)                     | 0.93                  | 20 (16.3%)             | 19 (15.4%)                     | 0.86    |
| Headache                 | 18 (7.1%)              | 13 (9.0%)                      | 0.48                  | 11 (8.9%)              | 9 (7.3%)                       | 0.64    |
| Nausea                   | 18 (7.1%)              | 11 (7.6%)                      | 0.83                  | 12 (9.8%)              | 8 (6.5%)                       | 0.35    |
| Appetite loss            | 35 (13.7%)             | 22 (15.3%)                     | 0.67                  | 19 (15.4%)             | 18 (14.6%)                     | 0.86    |

IQR: interquartile range.

**Supplementary Table 3.5. Comparisons of baseline characteristics in the original sample and the propensity score-matched sample by cardiovascular disease.**

|                          | Original sample               |                                    |                       | Matched sample                |                                   |         |
|--------------------------|-------------------------------|------------------------------------|-----------------------|-------------------------------|-----------------------------------|---------|
|                          | Cardiovascular disease (n=68) | Non-cardiovascular disease (n=331) | P-value               | Cardiovascular disease (n=58) | Non-cardiovascular disease (n=58) | P-value |
| Male                     | 38 (55.9%)                    | 177 (53.5%)                        | 0.72                  | 31 (53.4%)                    | 34 (58.6%)                        | 0.58    |
| Age, median (IQR)        | 73.5 (67 to 82)               | 65 (56 to 72)                      | $2.1 \times 10^{-10}$ | 73 (66 to 80)                 | 73 (68 to 81)                     | 0.66    |
| <b>Region</b>            |                               |                                    |                       |                               |                                   |         |
| China                    | 55 (80.9%)                    | 311 (94.0%)                        | $3.6 \times 10^{-4}$  | 51 (87.9%)                    | 55 (94.8%)                        | 0.19    |
| Europe/North America     | 13 (19.1%)                    | 20 (6.0%)                          |                       | 7 (12.1%)                     | 3 (5.2%)                          |         |
| <b>Signs or symptoms</b> |                               |                                    |                       |                               |                                   |         |
| Fever                    | 50 (73.5%)                    | 276 (83.4%)                        | 0.06                  | 45 (77.6%)                    | 45 (77.6%)                        | 1.00    |
| Cough                    | 41 (60.3%)                    | 215 (65.0%)                        | 0.47                  | 36 (62.1%)                    | 28 (48.3%)                        | 0.14    |
| Shortness of breath      | 35 (51.5%)                    | 114 (34.4%)                        | 0.008                 | 25 (43.1%)                    | 26 (44.8%)                        | 0.85    |
| Fatigue                  | 14 (20.6%)                    | 93 (28.1%)                         | 0.20                  | 13 (22.4%)                    | 15 (25.9%)                        | 0.66    |
| Myalgia                  | 6 (8.8%)                      | 52 (15.7%)                         | 0.14                  | 6 (10.3%)                     | 7 (12.1%)                         | 0.77    |
| Chills                   | 11 (16.2%)                    | 52 (15.7%)                         | 0.92                  | 10 (17.2%)                    | 8 (13.8%)                         | 0.61    |
| Diarrhea                 | 9 (13.2%)                     | 50 (15.1%)                         | 0.69                  | 8 (13.8%)                     | 8 (13.8%)                         | 1.00    |
| Headache                 | 5 (7.4%)                      | 26 (7.9%)                          | 0.89                  | 5 (8.6%)                      | 4 (6.9%)                          | 1.00    |
| Nausea                   | 3 (4.4%)                      | 26 (7.9%)                          | 0.44                  | 3 (5.2%)                      | 3 (5.2%)                          | 1.00    |
| Appetite loss            | 5 (7.4%)                      | 52 (15.7%)                         | 0.07                  | 5 (8.6%)                      | 6 (10.3%)                         | 0.75    |
| <b>Comorbidity</b>       |                               |                                    |                       |                               |                                   |         |
| Any comorbidity          | 68 (100.0%)                   | 187 (56.5%)                        | $1.0 \times 10^{-11}$ | 58 (100.0%)                   | 58 (100.0%)                       | –       |
| Hypertension             | 43 (63.2%)                    | 120 (36.3%)                        | $3.7 \times 10^{-5}$  | 36 (62.1%)                    | 34 (58.6%)                        | 0.70    |
| Diabetes mellitus        | 24 (35.3%)                    | 79 (23.9%)                         | 0.05                  | 20 (34.5%)                    | 27 (46.6%)                        | 0.19    |
| Cerebrovascular disease  | 10 (14.7%)                    | 15 (4.5%)                          | 0.004                 | 6 (10.3%)                     | 8 (13.8%)                         | 0.57    |
| Chronic liver disease    | 2 (2.9%)                      | 7 (2.1%)                           | 0.65                  | 2 (3.4%)                      | 2 (3.4%)                          | 1.00    |
| Digestive disease        | 3 (4.4%)                      | 5 (1.5%)                           | 0.14                  | 3 (5.2%)                      | 3 (5.2%)                          | 1.00    |
| Cancer                   | 5 (7.4%)                      | 15 (4.5%)                          | 0.36                  | 5 (8.6%)                      | 4 (6.9%)                          | 1.00    |
| Chronic bronchitis       | 5 (7.4%)                      | 11 (3.3%)                          | 0.17                  | 4 (6.9%)                      | 4 (6.9%)                          | 1.00    |
| COPD                     | 8 (11.8%)                     | 3 (0.9%)                           | $5.3 \times 10^{-5}$  | 3 (5.2%)                      | 2 (3.4%)                          | 1.00    |
| Tuberculosis             | 2 (2.9%)                      | 4 (1.2%)                           | 0.27                  | 2 (3.4%)                      | 0 (0.0%)                          | 0.50    |

IQR: interquartile range.

**Supplementary Table 3.6. Comparisons of baseline characteristics in the original sample and the propensity score matched sample by cerebrovascular disease.**

|                          | Original sample                |                                     |                      | Matched sample                 |                                    |         |
|--------------------------|--------------------------------|-------------------------------------|----------------------|--------------------------------|------------------------------------|---------|
|                          | Cerebrovascular disease (n=25) | Non-cerebrovascular disease (n=374) | P-value              | Cerebrovascular disease (n=25) | Non-cerebrovascular disease (n=25) | P-value |
| Male                     | 16 (64.0%)                     | 199 (53.2%)                         | 0.30                 | 16 (64.0%)                     | 9 (36.0%)                          | 0.05    |
| Age, median (IQR)        | 78 (65.5 to 84)                | 66 (57 to 73)                       | 2.0×10 <sup>-4</sup> | 78 (65.5 to 84)                | 74 (65.5 to 83)                    | 0.83    |
| <b>Region</b>            |                                |                                     |                      |                                |                                    |         |
| China                    | 21 (84.0%)                     | 345 (92.2%)                         | 0.14                 | 21 (84.0%)                     | 25 (100%)                          | 0.11    |
| Europe/North America     | 4 (16.0%)                      | 29 (7.8%)                           |                      | 4 (16.0%)                      | 0 (0.0%)                           |         |
| <b>Signs or symptoms</b> |                                |                                     |                      |                                |                                    |         |
| Fever                    | 19 (76.0%)                     | 307 (82.1%)                         | 0.43                 | 19 (76.0%)                     | 18 (72.0%)                         | 0.75    |
| Cough                    | 13 (52.0%)                     | 243 (65.0%)                         | 0.19                 | 13 (52.0%)                     | 13 (52.0%)                         | 1.00    |
| Shortness of breath      | 12 (48.0%)                     | 137 (36.6%)                         | 0.26                 | 12 (48.0%)                     | 8 (32.0%)                          | 0.25    |
| Fatigue                  | 6 (24.0%)                      | 101 (27.0%)                         | 0.74                 | 6 (24.0%)                      | 6 (24.0%)                          | 1.00    |
| Myalgia                  | 4 (16.0%)                      | 54 (14.4%)                          | 0.77                 | 4 (16.0%)                      | 2 (8.0%)                           | 0.67    |
| Chills                   | 4 (16.0%)                      | 59 (15.8%)                          | 1.00                 | 4 (16.0%)                      | 0 (0.0%)                           | 0.11    |
| Diarrhea                 | 2 (8.0%)                       | 57 (15.2%)                          | 0.56                 | 2 (8.0%)                       | 4 (16.0%)                          | 0.67    |
| Headache                 | 3 (12.0%)                      | 28 (7.5%)                           | 0.43                 | 3 (12.0%)                      | 1 (4.0%)                           | 0.61    |
| Nausea                   | 4 (16.0%)                      | 25 (6.7%)                           | 0.10                 | 4 (16.0%)                      | 1 (4.0%)                           | 0.35    |
| Appetite loss            | 3 (12.0%)                      | 54 (14.4%)                          | 1.00                 | 3 (12.0%)                      | 2 (8.0%)                           | 1.00    |
| <b>Comorbidity</b>       |                                |                                     |                      |                                |                                    |         |
| Any comorbidity          | 25 (100.0%)                    | 230 (61.5%)                         | 1.0×10 <sup>-4</sup> | 25 (100.0%)                    | 25 (100.0%)                        | –       |
| Hypertension             | 18 (72.0%)                     | 145 (38.8%)                         | 0.001                | 18 (72.0%)                     | 20 (80.0%)                         | 0.51    |
| Diabetes mellitus        | 10 (40.0%)                     | 93 (24.9%)                          | 0.09                 | 10 (40.0%)                     | 14 (56.0%)                         | 0.26    |
| Cardiovascular disease   | 10 (40.0%)                     | 58 (15.5%)                          | 0.004                | 10 (40.0%)                     | 11 (44.0%)                         | 0.77    |
| Chronic liver disease    | 0 (0.0%)                       | 9 (2.4%)                            | 1.00                 | 0 (0.0%)                       | 0 (0.0%)                           | –       |
| Digestive disease        | 2 (8.0%)                       | 6 (1.6%)                            | 0.08                 | 2 (8.0%)                       | 0 (0.0%)                           | 0.49    |
| Cancer                   | 2 (8.0%)                       | 18 (4.8%)                           | 0.36                 | 2 (8.0%)                       | 1 (4.0%)                           | 1.00    |
| Chronic bronchitis       | 2 (8.0%)                       | 14 (3.7%)                           | 0.27                 | 2 (8.0%)                       | 1 (4.0%)                           | 1.00    |
| COPD                     | 1 (4.0%)                       | 10 (2.7%)                           | 0.51                 | 1 (4.0%)                       | 0 (0.0%)                           | 1.00    |
| Tuberculosis             | 0 (0.0%)                       | 6 (1.6%)                            | 1.00                 | 0 (0.0%)                       | 1 (4.0%)                           | 1.00    |

IQR: interquartile range.

**Supplementary Table 3.7. Comparisons of baseline characteristics in the original sample and the propensity score matched sample by COPD.**

|                          | Original sample |                     |                      | Matched sample |                   |         |
|--------------------------|-----------------|---------------------|----------------------|----------------|-------------------|---------|
|                          | COPD<br>(n=11)  | Non-COPD<br>(n=388) | P-value              | COPD<br>(n=9)  | Non-COPD<br>(n=9) | P-value |
| Male                     | 8 (72.7%)       | 207 (53.4%)         | 0.20                 | 8 (88.9%)      | 5 (55.6%)         | 0.29    |
| Age, median (IQR)        | 78 (66 to 84)   | 66 (57 to 73)       | 0.01                 | 75 (65 to 81)  | 72 (67 to 82)     | 0.93    |
| <b>Region</b>            |                 |                     |                      |                |                   |         |
| China                    | 7 (63.6%)       | 359 (92.5%)         | 0.009                | 7 (77.8%)      | 7 (77.8%)         | 1.00    |
| Europe/North America     | 4 (36.4%)       | 29 (7.5%)           |                      | 2 (22.2%)      | 2 (22.2%)         |         |
| <b>Signs or symptoms</b> |                 |                     |                      |                |                   |         |
| Fever                    | 6 (54.5%)       | 320 (82.5%)         | 0.03                 | 6 (66.7%)      | 6 (66.7%)         | 1.00    |
| Cough                    | 7 (63.6%)       | 249 (64.2%)         | 1.00                 | 6 (66.7%)      | 6 (66.7%)         | 1.00    |
| Shortness of breath      | 9 (81.8%)       | 140 (36.1%)         | 0.003                | 7 (77.8%)      | 6 (66.7%)         | 1.00    |
| Fatigue                  | 2 (18.2%)       | 105 (27.1%)         | 0.73                 | 2 (22.2%)      | 3 (33.3%)         | 1.00    |
| Myalgia                  | 1 (9.1%)        | 57 (14.7%)          | 1.00                 | 1 (11.1%)      | 1 (11.1%)         | 1.00    |
| Chills                   | 2 (18.2%)       | 61 (15.7%)          | 0.69                 | 2 (22.2%)      | 0 (0.0%)          | 0.47    |
| Diarrhea                 | 3 (27.3%)       | 56 (14.4%)          | 0.21                 | 3 (33.3%)      | 1 (11.1%)         | 0.58    |
| Headache                 | 2 (18.2%)       | 29 (7.5%)           | 0.21                 | 2 (22.2%)      | 1 (11.1%)         | 1.00    |
| Nausea                   | 1 (9.1%)        | 28 (7.2%)           | 0.57                 | 1 (11.1%)      | 0 (0.0%)          | 1.00    |
| Appetite loss            | 1 (9.1%)        | 56 (14.4%)          | 1.00                 | 1(11.1%)       | 1 (11.1%)         | 1.00    |
| <b>Comorbidity</b>       |                 |                     |                      |                |                   |         |
| Any comorbidity          | 11 (100%)       | 244 (62.9%)         | 0.009                | 9 (100%)       | 8 (88.9%)         | 1.00    |
| Hypertension             | 6 (54.5%)       | 157 (40.5%)         | 0.37                 | 4 (44.4%)      | 6 (66.7%)         | 0.64    |
| Diabetes mellitus        | 5 (45.5%)       | 98 (25.3%)          | 0.16                 | 4 (44.4%)      | 4 (44.4%)         | 1.00    |
| Cardiovascular disease   | 8 (72.7%)       | 60 (15.5%)          | $5.3 \times 10^{-5}$ | 6 (66.7%)      | 7 (77.8%)         | 1.00    |
| Cerebrovascular disease  | 1 (9.1%)        | 24 (6.2%)           | 0.51                 | 1 (11.1%)      | 2 (22.2%)         | 1.00    |
| Chronic liver disease    | 0 (0.0%)        | 9 (2.3%)            | 1.00                 | 0 (0.0%)       | 0 (0.0%)          | –       |
| Digestive disease        | 0 (0.0%)        | 8 (2.1%)            | 1.00                 | 0 (0.0%)       | 0 (0.0%)          | –       |
| Cancer                   | 1 (9.1%)        | 19 (4.9%)           | 0.44                 | 1 (11.1%)      | 0 (0.0%)          | 1.00    |
| Chronic bronchitis       | 1 (9.1%)        | 15 (3.9%)           | 0.37                 | 1 (11.1%)      | 0 (0.0%)          | 1.00    |
| Tuberculosis             | 0 (0.0%)        | 6 (1.5%)            | 1.00                 | 0 (0.0%)       | 0 (0.0%)          | –       |

IQR: interquartile range.



**Supplementary Table 4. Retrieved online records of COVID-19 patients in China, European regions, and North America.**

| Country                 | >5 dead cases by 2020/04/30 # | Retrieved records in total * | Excluded records & | Records in our analysis |
|-------------------------|-------------------------------|------------------------------|--------------------|-------------------------|
| China                   | Yes                           | 416                          | 1                  | 415                     |
| <b>European regions</b> |                               |                              |                    |                         |
| Albania                 | Yes                           | 5                            | 0                  | 5                       |
| Andorra                 | Yes                           | 1                            | 1                  | 0                       |
| Austria                 | Yes                           | 20                           | 0                  | 20                      |
| Belarus                 | Yes                           | 1                            | 1                  | 0                       |
| Belgium                 | Yes                           | 15                           | 4                  | 11                      |
| Bosnia and Herzegovina  | Yes                           | 2                            | 2                  | 0                       |
| Bulgaria                | Yes                           | 6                            | 0                  | 6                       |
| Croatia                 | Yes                           | 7                            | 1                  | 6                       |
| Cyprus                  | Yes                           | 3                            | 3                  | 0                       |
| Czechia                 | Yes                           | 4                            | 4                  | 0                       |
| Denmark                 | Yes                           | 3                            | 3                  | 0                       |
| Estonia                 | Yes                           | 3                            | 3                  | 0                       |
| Finland                 | Yes                           | 0                            | 0                  | 0                       |
| France                  | Yes                           | 62                           | 4                  | 58                      |
| Georgia                 | Yes                           | 6                            | 4                  | 2                       |
| Germany                 | Yes                           | 49                           | 0                  | 49                      |
| Greece                  | Yes                           | 15                           | 0                  | 15                      |
| Hungary                 | Yes                           | 15                           | 0                  | 15                      |
| Iceland                 | Yes                           | 3                            | 3                  | 0                       |
| Ireland                 | Yes                           | 8                            | 0                  | 8                       |
| Italy                   | Yes                           | 56                           | 3                  | 53                      |
| Latvia                  | Yes                           | 0                            | 0                  | 0                       |
| Liechtenstein           | No                            | -                            | -                  | -                       |
| Lithuania               | Yes                           | 6                            | 0                  | 6                       |
| Luxembourg              | Yes                           | 1                            | 1                  | 0                       |
| Malta                   | No                            | -                            | -                  | -                       |
| Monaco                  | No                            | -                            | -                  | -                       |
| Montenegro              | Yes                           | 1                            | 1                  | 0                       |
| Netherlands             | Yes                           | 9                            | 0                  | 9                       |
| North Macedonia         | Yes                           | 4                            | 4                  | 0                       |
| Norway                  | Yes                           | 1                            | 1                  | 0                       |
| Poland                  | Yes                           | 24                           | 0                  | 24                      |
| Portugal                | Yes                           | 4                            | 4                  | 0                       |
| Republic of Moldova     | Yes                           | 2                            | 2                  | 0                       |
| Romania                 | Yes                           | 7                            | 0                  | 7                       |
| Russian Federation      | Yes                           | 6                            | 1                  | 5                       |
| San Marino              | Yes                           | 1                            | 1                  | 0                       |
| Serbia                  | Yes                           | 7                            | 0                  | 7                       |
| Slovakia                | Yes                           | 1                            | 1                  | 0                       |

|                                  |     |      |     |      |
|----------------------------------|-----|------|-----|------|
| Slovenia                         | Yes | 3    | 3   | 0    |
| Spain                            | Yes | 201  | 76  | 125  |
| Sweden                           | Yes | 1    | 1   | 0    |
| Switzerland                      | Yes | 4    | 4   | 0    |
| The United Kingdom               | Yes | 35   | 0   | 35   |
| Ukraine                          | Yes | 2    | 2   | 0    |
| <b>North America</b>             |     |      |     |      |
| United States of America         | Yes | 191  | 24  | 167  |
| Antigua and Barbuda              | No  | -    | -   | 0    |
| Bahamas                          | Yes | 1    | 1   | 0    |
| Barbados                         | Yes | 1    | 1   | 0    |
| Belize                           | No  | -    | -   | 0    |
| Canada                           | Yes | 5    | 2   | 3    |
| Costa Rica                       | Yes | 2    | 2   | 0    |
| Cuba                             | Yes | 6    | 0   | 6    |
| Dominica                         | No  | -    | -   | 0    |
| Dominican Republic               | Yes | 4    | 4   | 0    |
| El Salvador                      | Yes | 0    | 0   | 0    |
| Grenada                          | No  | -    | -   | 0    |
| Guatemala                        | Yes | 1    | 1   | 0    |
| Haiti                            | Yes | 2    | 2   | 0    |
| Honduras                         | Yes | 4    | 4   | 0    |
| Jamaica                          | Yes | 2    | 2   | 0    |
| Mexico                           | Yes | 18   | 0   | 18   |
| Nicaragua                        | Yes | 1    | 1   | 0    |
| Panama                           | Yes | 3    | 3   | 0    |
| Saint Kitts and Nevis            | No  | -    | -   | 0    |
| Saint Lucia                      | No  | -    | -   | 0    |
| Saint Vincent and the Grenadines | No  | -    | -   | 0    |
| Trinidad and Tobago              | Yes | 2    | 2   | 0    |
| <b>Total</b>                     |     | 1267 | 192 | 1075 |

#: "Yes" indicates a country with  $\geq 5$  dead cases by 2020/04/30. The number of dead cases was retrieved based on the situation report of COVID-19 from the WHO (date: April 30, 2020).

\*: Total number of retrieved online records from each country.

&: Records were excluded if they failed to fulfill four selection criteria:

(i) Patients did not receive remdesivir;

(ii) Patients did not receive dexamethasone;

(iii) Patients cases were hospitalized after May 1 and had missing data of therapy;

(iv) Countries with limited number of COVID-19 cases in the dataset ( $< 5$ ).
